# Supplementary material for: EZ Clear for simple, rapid, and robust mouse whole organ clearing
Source: eLife. 2022 Oct 11;11:e77419. doi: 10.7554/eLife.77419 (PMC9555867; doi:10.7554/eLife.77419)
Supplement: Figure 1—figure supplement 1—source data 1. [file elife-77419-fig1-figsupp1-data1.xlsx]

## Sheet: Sheet1
Raw measurment							Ratio compared to after perfusion
	Sample #	Perfusion	Delipidation	Wash	RI Matching			Sample #	Perfusion	Delipidation	Wash	RI Matching
3DISCO	A	2653646	1630352		1603547		3DISCO	A	2653646	0.614382		0.604281
	B	2820498	1642891		1619853			B	2820498	0.582483		0.574315
	C	2795426	1676382		1660872			C	2795426	0.599687		0.594139
	D	2833117	1724020		1697385			D	2833117	0.608524		0.599123
Fast 3D	E	2597482	2008478	2891407	1936169		Fast 3D	E	2597482	0.77324	1.11316	0.745402
	F	2852558	2249657	3083497	2290936			F	2852558	0.788645	1.08096	0.803116
	G	2812439	2195654	3051867	2217128			G	2812439	0.780694	1.08513	0.788329
	H	2924934	2192006	3174385	2242652			H	2924934	0.749421	1.08528	0.766736
EZ Clear	I	2700176	2877379	4306922	3124547		EZ Clear	I	2700176	1.06563	1.59505	1.15716
	J	2573813	2760233	4066301	2609783			J	2573813	1.07243	1.57987	1.01398
	K	2692746	2874900	4276791	2806465			K	2692746	1.06765	1.58826	1.04223
	L	2655993	2858931	4387306	2858716			L	2655993	1.07641	1.65185	1.07633
X-Clarity	M	2551340	5065261	4143472	4237863		X-Clarity	M	2551340	1.98533	1.62404	1.66103
	N	2730501	5691696	4186400	4270154			N	2730501	2.08449	1.5332	1.56387
	O	2652395	5292615	4001592	4160061			O	2652395	1.99541	1.50867	1.56842
	P	2619033	5467651	4091440	4292690			P	2619033	2.08766	1.56219	1.63904
								Mean	Perfusion	Delipidation	Wash	RI Matching
							EZ Clear		1	1.07053	1.60376	1.07242
							FAST 3D		1	0.773	1.09113	0.775896
							3DISCO		1	0.601269		0.592964
							X-Clarity		1	2.03822	1.55703	1.60809
								SD	Perfusion	Delipidation	Wash	RI Matching
							EZ Clear		1	0.0048482	0.0326562	0.0619784
							FAST 3D		1	0.0169314	0.0148192	0.0252277
							3DISCO		1	0.0139046		0.0131045
							X-Clarity		1	0.0554218	0.0497433	0.0492949
								Perfusion	Delipidation		RI Matching
								Mean	Mean	Stdev	Mean	Stdev
							EZ Clear	1	1.07053	0.0048482	1.07242	0.0619784
							FAST 3D	1	0.773	0.0169314	0.775896	0.0252277
							3DISCO	1	0.601269	0.0139046	0.592964	0.0131045
							X-Clarity	1	2.03822	0.0554218	1.60809	0.0492949
