# Supplementary material for: EZ Clear for simple, rapid, and robust mouse whole organ clearing
Source: eLife. 2022 Oct 11;11:e77419. doi: 10.7554/eLife.77419 (PMC9555867; doi:10.7554/eLife.77419)
Supplement: Figure 1—source data 1. [file elife-77419-fig1-data1.xlsx]

## Sheet: Sheet1
Raw measurment
		Perfusion	Delipidation	Wash	RI Matching
3DISCO	A	2653646	1630352		1603547			Size Change after RI matching
	B	2820498	1642891		1619853				Mean	SD
	C	2795426	1676382		1660872			Perfusion	2.71663e+06	111312
	D	2833117	1724020		1697385			EZ Clear	2.84988e+06	212172
Fast 3D	E	2597482	2008478	2891407	1936169			Fast 3D	2.17172e+06	159990
	F	2852558	2249657	3083497	2290936			3DISCO	1.64541e+06	42214.3
	G	2812439	2195654	3051867	2217128			X-CLARITY	4240192	57966
	H	2924934	2192006	3174385	2242652
EZ Clear	I	2700176	2877379	4306922	3124547
	J	2573813	2760233	4066301	2609783
	K	2692746	2874900	4276791	2806465
	L	2655993	2858931	4387306	2858716
X-Clarity	M	2551340	5065261	4143472	4237863
	N	2730501	5691696	4186400	4270154
	O	2652395	5292615	4001592	4160061
	P	2619033	5467651	4091440	4292690
	Mean	Perfusion	Delipidation	Wash	RI Matching
EZ Clear		2655682	2.84286e+06	4259330	2.84988e+06
FAST 3D		2.79685e+06	2.16145e+06	3050289	2.17172e+06
3DISCO		2.77567e+06	1.66841e+06		1.64541e+06
X-Clarity		2.63832e+06	5.37931e+06	4105726	4240192
	SD	Perfusion	Delipidation	Wash	RI Matching
EZ Clear		57896.7	55688.5	136879	212172
FAST 3D		140830	105332	117967	159990
3DISCO		82845	41855.5		42214.3
X-Clarity		74460.2	265538	79542.5	57966
