# Supplementary material for: EZ Clear for simple, rapid, and robust mouse whole organ clearing
Source: eLife. 2022 Oct 11;11:e77419. doi: 10.7554/eLife.77419 (PMC9555867; doi:10.7554/eLife.77419)
Supplement: Figure 2—source data 1. [file elife-77419-fig2-data1.xlsx]

## Sheet: Nycodenz w Urea
Measurment of refractive index
Urea Only	MQ-H2O	phosphate buffer	1M	2M	3M	4M	5M	6M	7M	8M
1	1.3324	1.3329	1.342	1.3506	1.3591	1.367	1.3756	1.3828	1.3925	1.3997
2	1.3322	1.333	1.3421	1.3507	1.3592	1.367	1.3756	1.383	1.3926	1.3999
3	1.3325	1.333	1.3421	1.3506	1.3592	1.367	1.3756	1.3828	1.3925	1.4002
Nyco Only	MQ-H2O	phosphate buffer	0.1	0.2	0.3	0.4	0.5	0.6	0.7	0.8
1	1.3325	1.333	1.3485	1.3646	1.3803	1.3969	1.4117	1.4286	1.4436	1.4625
2	1.3324	1.333	1.3484	1.3645	1.3801	1.3967	1.4115	1.4295	1.4433	1.4652
3	1.3324	1.3329	1.3484	1.3645	1.3802	1.3966	1.4125	1.4308	1.4435	1.4615
80% Nyco + Urea	MQ-H2O	phosphate buffer	1M	2M	3M	4M	5M	6M	7M	8M
1	1.3324	1.333	1.4683	1.482	1.4885	1.4969	1.5048	1.5085	1.5181	1.5137
2	1.3324	1.333	1.4682	1.4821	1.4886	1.4966	1.5044	1.5085	1.5183	1.5149
3	1.3324	1.333	1.468	1.4818	1.4878	1.4968	1.5046	1.5085	1.5186	1.5144
										Oversaturated
Urea	MQ-H2O	phosphate buffer	1M	2M	3M	4M	5M	6M	7M	8M
Mean	1.33237	1.33297	1.34207	1.35063	1.35917	1.367	1.3756	1.38287	1.39253	1.39993
SD	0.000152753	5.7735e-05	5.7735e-05	5.7735e-05	5.7735e-05	0	2.71948e-16	0.00011547	5.7735e-05	0.000251661
Nyco Only	MQ-H2O	phosphate buffer	0.1	0.2	0.3	0.4	0.5	0.6	0.7	0.8
Mean	1.33243	1.33297	1.34843	1.36453	1.3802	1.39673	1.4119	1.42963	1.44347	1.46307
SD	5.7735e-05	5.7735e-05	5.7735e-05	5.7735e-05	0.0001	0.000152753	0.00052915	0.00110604	0.000152753	0.00191398
Nyco		80% Nyco	80% Nyco	80% Nyco	80% Nyco	80% Nyco	80% Nyco	80% Nyco	80% Nyco	80% Nyco
Urea	MQ-H2O	0M Urea	1M Urea	2M Urea	3M Urea	4M Urea	5M Urea	6M Urea	7M Urea	8M Urea
	1.3324	1.46307	1.46817	1.48197	1.4883	1.49677	1.5046	1.5085	1.51833	1.51433
	0	0.00191398	0.000152753	0.000152753	0.00043589	0.000152753	0.0002	0	0.000251661	0.000602771
										Oversaturated

## Sheet: EZ vs RIMS - intensity
Mean fluoorescence intensity (Raw)
low Th: 1000	EZ View			RIMS					EZ View		RIMS
Imaging depth (um)	D1	E1	F1	D1	E1	F1		Imaging depth (um)	Average	SD	Average	SD
1000	1428.34	1726.37	1798.08	1517.53	1614.55	1656.63		1000	1650.93	196.075	1596.24	71.3354
2000	1663.87	1691.1	1745.96	1359.83	1317.73	1663.48		2000	1700.31	41.8128	1447.01	188.644
3000	1605.81	1493.07	1483.24	1242.61	1280.49	1663.37		3000	1527.37	68.1057	1395.49	232.763
4000	1775.34	1624.73	1691.43	1207.83	1084.52	1280.52		4000	1697.17	75.4687	1190.96	99.0837
5000	1822.38	1581.18	1497.21	1042.04	1208.73	1045.61		5000	1633.59	168.802	1098.79	95.2247

## Sheet: EZ - tracing
Mean fluoorescence intensity (Raw)														Mean fluorescence intensity (average)
low Th: 1000	Day 14			Day 17			Day 43			Day 70
Imaging depth (um)	D1	E1	F1	D1	E1	F1	D1	E1	F1	D1	E1	F1		Imaging depth (um)	Day 14	Day17	Day 43	Day 70
1000	1669.52	1475.88	1514.49	1425.33	1848.78	1819.36	1450.41	1498.57	1646.76	1380.57	2603.53	1731.24		1000	1553.3	1697.82	1531.91	1905.11
2000	1832.38	1428.05	1747.61	1970.47	1677.79	1847.93	2153.43	1910.62	2005.82	1710.47	1618.56	1653.6		2000	1669.35	1832.06	2023.29	1660.88
3000	1597.17	1324.99	1511.03	2208.87	1658.61	1445.02	1988.14	1809.4	1731.85	1819.73	1762.49	1668.47		3000	1477.73	1770.83	1843.13	1750.23
4000	1973.6	1323.13	1252.95	2352.75	2049.04	1858.76	2516.68	1486.09	1411.03	2145.58	1909.6	2429.4		4000	1516.56	2086.85	1804.6	2161.53
5000	1564.94	1549.88	1300.03	1974.35	1465.67	1594.99	2523.65	2238.1	1564.37	1428.18	2464.37	2043.57		5000	1471.62	1678.34	2108.71	1978.71
														Mean fluorescence intensity (SD)
														Imaging depth (um)	Day 14	Day17	Day 43	Day 70
														1000	102.487	236.444	102.334	629.747
														2000	213.222	146.982	122.344	46.3877
														3000	139.111	394.097	131.432	76.3716
														4000	397.358	249.156	617.823	260.267
														5000	148.789	264.382	492.556	521.131
