# Supplementary material for: EZ Clear for simple, rapid, and robust mouse whole organ clearing
Source: eLife. 2022 Oct 11;11:e77419. doi: 10.7554/eLife.77419 (PMC9555867; doi:10.7554/eLife.77419)
Supplement: Figure 3—source data 1. [file elife-77419-fig3-data1.xlsx]

## Sheet: EZ vs FAST - Intensity
Mean fluoorescence intensity (Raw)
	EZ Clear			FAST 3D					EZ Clear		FAST 3D
Imaging depth (um)	D1	E1	F1	D1	E1	F1		Imaging depth (um)	Average	SD	Average	SD
1000	1425.33	1848.78	1819.36	1707.62	1338.15	1606.25		1000	1697.82	236.444	1550.67	190.902
2000	1970.47	1677.79	1847.93	1805.15	1756.2	1555.05		2000	1832.06	146.982	1705.47	132.544
3000	2208.87	1658.61	1445.02	1581.58	1875.09	1631.64		3000	1770.83	394.097	1696.1	157.014
4000	2352.75	2049.04	1858.76	1643.48	1851.96	1473.2		4000	2086.85	249.156	1656.21	189.701
5000	1974.35	1465.67	1594.99	1561.97	1309.44	1450.34		5000	1678.34	264.382	1440.58	126.547

## Sheet: EZ vs FAST - Contrast
	EZ Clear									FAST 3D
	D1			E1			F1			D1			E1			F1					EZ Clear		Fast 3D
Imaging depth (um)	Min	Max	Contrast	Min	Max	Contrast	Min	Max	Contrast	Min	Max	Contrast	Min	Max	Contrast	Min	Max	Contrast		Imaging depth (um)	Average	SD	Average	SD
5000	246	37826	0.987077	252	23830	0.979072	266	39232	0.986531	960	3652	0.583695	754	3596	0.653333	820	6384	0.772349		5000	0.984227	0.00447272	0.669792	0.0953979
4950	248	35996	0.986315	258	19510	0.973897	272	21020	0.97445	916	4692	0.673324	722	3866	0.685266	806	4792	0.71204		4950	0.978221	0.00701514	0.69021	0.0198259
4900	258	40542	0.987353	276	24514	0.977733	280	10926	0.950027	978	5236	0.685227	738	4880	0.737273	808	4356	0.687064		4900	0.971704	0.0193796	0.703188	0.0295327
4850	260	43050	0.987994	272	10562	0.949788	260	11372	0.955296	990	5116	0.675729	710	5276	0.76278	812	5262	0.732631		4850	0.964359	0.0206526	0.723713	0.0442054
4800	270	42990	0.987517	262	12120	0.957681	278	10076	0.946301	998	4182	0.614672	686	4012	0.707961	838	5046	0.71516		4800	0.963833	0.0212858	0.679264	0.0560543
4750	258	65535	0.992157	258	13060	0.961255	280	7260	0.925729	1000	4216	0.616564	786	2838	0.566225	838	5456	0.733715		4750	0.959714	0.0332407	0.638835	0.0859369
4700	268	65535	0.991854	264	8852	0.94208	264	13286	0.961033	1008	4428	0.629139	816	5858	0.755469	856	5794	0.742556		4700	0.964989	0.025122	0.709055	0.0695096
4650	258	48690	0.989458	268	13250	0.960349	268	7638	0.932203	986	3738	0.582557	834	5216	0.724298	878	5558	0.72716		4650	0.96067	0.0286288	0.678005	0.0826725
4600	264	38404	0.986345	280	11762	0.953496	250	8438	0.942449	1016	3432	0.543165	828	5660	0.74476	896	5728	0.729469		4600	0.960764	0.0228326	0.672465	0.112237
4550	264	44096	0.988097	264	13378	0.961296	266	12444	0.958143	1034	5470	0.682042	834	6006	0.75614	900	6406	0.753627		4550	0.969179	0.0164596	0.730603	0.0420741
4500	246	40790	0.988011	274	23296	0.97675	254	8532	0.942181	1010	9246	0.803042	816	8810	0.830459	898	6866	0.768676		4500	0.96898	0.0238824	0.800726	0.0309567
4450	266	30524	0.982722	280	18668	0.970445	270	15562	0.965892	1032	9780	0.809101	868	6096	0.750718	906	7840	0.79282		4450	0.97302	0.0087052	0.784213	0.0301281
4400	262	38334	0.986423	282	15028	0.963161	262	14980	0.965621	1030	9684	0.807728	860	7610	0.79693	890	8386	0.808107		4400	0.971735	0.0127796	0.804255	0.00634631
4350	282	31474	0.98224	224	28508	0.984408	260	36156	0.985721	1048	6744	0.731006	896	7382	0.783523	868	8296	0.810563		4350	0.984123	0.00175791	0.775031	0.0404526
4300	270	31896	0.983212	232	42506	0.989143	262	19690	0.973737	1068	8930	0.786357	918	7870	0.791079	874	6128	0.750357		4300	0.982031	0.00777073	0.775931	0.0222732
4250	262	65535	0.992036	256	33736	0.984938	274	10644	0.949808	1070	6782	0.727458	914	9884	0.830709	878	6946	0.775562		4250	0.975594	0.0226117	0.77791	0.0516657
4200	272	65535	0.991733	242	41704	0.988461	268	16328	0.967703	1018	8330	0.782199	932	9126	0.814675	862	6902	0.77795		4200	0.982633	0.0130325	0.791608	0.0200893
4150	256	40986	0.987585	256	34612	0.985316	270	20454	0.973943	1030	8216	0.777201	950	11188	0.843467	904	7466	0.78399		4150	0.982282	0.00730982	0.801553	0.036457
4100	278	39858	0.986147	282	42158	0.986711	240	17754	0.973324	996	9658	0.813028	906	13262	0.872106	914	6680	0.759284		4100	0.982061	0.00757109	0.814806	0.0564323
4050	284	41892	0.986533	268	65535	0.991854	270	15138	0.964953	938	9336	0.817403	894	19122	0.910671	900	5994	0.738903		4050	0.981113	0.0142458	0.822326	0.0859898
4000	290	49370	0.988321	270	45330	0.988158	280	25822	0.978546	980	10712	0.832364	924	22274	0.920338	910	10166	0.835681		4000	0.985008	0.00559715	0.862794	0.0498619
3950	290	40250	0.985693	276	32100	0.98295	286	12944	0.956765	956	9232	0.812328	956	21560	0.915083	938	11528	0.849511		3950	0.975136	0.0159689	0.858974	0.0520267
3900	296	42512	0.986171	282	56412	0.990052	282	11622	0.952621	984	7648	0.772011	964	18744	0.902172	936	6294	0.741079		3900	0.976281	0.0205821	0.805087	0.0854883
3850	298	33188	0.982202	278	65534	0.991552	278	13382	0.959297	1012	8502	0.787261	976	27396	0.9312	978	6650	0.743576		3850	0.977683	0.0165951	0.820679	0.0981744
3800	260	36658	0.985915	274	60122	0.990927	272	24740	0.97825	1028	8278	0.779067	1032	19466	0.899307	1002	11376	0.8381		3800	0.985031	0.00638414	0.838825	0.0601233
3750	282	44550	0.98742	282	62998	0.991087	280	65535	0.991491	972	25000	0.92515	1064	26114	0.921701	972	9064	0.806297		3750	0.989999	0.00224321	0.884383	0.0676461
3700	296	39828	0.985246	276	65535	0.991612	278	65535	0.991552	1022	10880	0.828264	1086	32818	0.935937	1018	7772	0.768373		3700	0.98947	0.00365842	0.844191	0.0849096
3650	276	38426	0.985737	276	30166	0.981867	276	18280	0.970252	894	9098	0.821057	1102	24794	0.91489	1032	10674	0.82368		3650	0.979286	0.00805883	0.853209	0.0534336
3600	282	38584	0.985489	272	52860	0.989761	280	14194	0.96131	940	9238	0.815288	1056	33816	0.939436	1006	39196	0.949953		3600	0.978853	0.0153425	0.901559	0.0748976
3550	290	65535	0.991189	288	45572	0.98744	276	23564	0.976846	918	16924	0.897097	1042	45466	0.955191	1018	16628	0.88462		3550	0.985158	0.00743885	0.912302	0.0376625
3500	292	56864	0.989782	276	65535	0.991612	286	14192	0.960492	958	15818	0.885789	1046	38316	0.946852	1002	15296	0.87704		3500	0.980629	0.0174632	0.903227	0.0380328
3450	284	50558	0.988828	264	65535	0.991976	308	16964	0.964335	994	13626	0.864022	1118	29940	0.928006	964	21156	0.912839		3450	0.981713	0.0151316	0.901622	0.0334342
3400	266	54648	0.990312	268	46706	0.988589	290	14672	0.961235	994	9372	0.808219	1120	30120	0.928297	910	16054	0.892714		3400	0.980046	0.0163131	0.87641	0.0616769
3350	284	65535	0.99137	266	65535	0.991915	296	12084	0.952181	990	24042	0.920901	1072	29538	0.929958	986	21026	0.910413		3350	0.978489	0.0227849	0.920424	0.00978126
3300	256	65535	0.992218	242	65535	0.992642	290	65535	0.991189	972	18576	0.900552	1068	45750	0.954377	1018	20692	0.906218		3300	0.992016	0.00074722	0.920382	0.0295757
3250	260	65535	0.992097	246	42228	0.988416	288	65535	0.991249	980	8650	0.796469	1038	25714	0.922398	994	21092	0.909988		3250	0.990587	0.0019273	0.876285	0.0694006
3200	284	44294	0.987258	254	43228	0.988317	268	15214	0.965379	1004	9676	0.811985	1018	23132	0.915694	982	19770	0.905359		3200	0.980318	0.0129484	0.877679	0.0571269
3150	294	25874	0.97753	260	27884	0.981524	252	59236	0.991528	990	18988	0.900891	1028	24518	0.919518	1002	30364	0.936109		3150	0.983527	0.0072108	0.918839	0.0176189
3100	268	25004	0.978791	266	26488	0.980115	260	65535	0.992097	992	11266	0.838147	1000	33154	0.941442	962	13900	0.870542		3100	0.983668	0.00732983	0.883377	0.0528301
3050	292	28402	0.979647	250	28006	0.982305	264	12804	0.959596	948	10780	0.838336	1012	33380	0.941149	1004	13268	0.859305		3050	0.973849	0.0124151	0.879597	0.0543274
3000	290	44074	0.986926	262	31242	0.983367	278	17426	0.968595	958	12796	0.860695	1002	31282	0.937926	1016	15188	0.874599		3000	0.979629	0.00972064	0.891073	0.0411668
2950	290	32382	0.982248	274	40768	0.986648	282	16968	0.967304	888	14182	0.88215	1016	24148	0.91925	992	13042	0.858629		2950	0.978733	0.0101393	0.886676	0.0305628
2900	276	35952	0.984763	266	54378	0.990264	288	18016	0.968531	926	33808	0.94668	1020	34078	0.941877	1012	11312	0.835768		2900	0.981186	0.0112993	0.908108	0.062695
2850	274	29078	0.98133	284	65535	0.99137	278	23012	0.976127	926	15100	0.884438	1078	31228	0.933263	1004	14560	0.870984		2850	0.982942	0.00774845	0.896228	0.0327708
2800	302	43974	0.986358	280	65535	0.991491	270	16298	0.967407	882	13036	0.873258	1056	40530	0.949214	950	16410	0.890553		2800	0.981752	0.0126856	0.904341	0.0398111
2750	296	40878	0.985622	264	65535	0.991976	272	24836	0.978334	948	9820	0.823923	1038	38932	0.948061	944	20708	0.912803		2750	0.98531	0.00682632	0.894929	0.0639702
2700	284	28044	0.979949	276	65535	0.991612	280	20898	0.973557	938	12778	0.863225	1066	39412	0.947329	956	13886	0.871176		2700	0.981706	0.0091548	0.89391	0.0464327
2650	304	21730	0.972406	268	65535	0.991854	276	13340	0.959459	898	10886	0.84759	1058	38976	0.947145	994	21498	0.911613		2650	0.974573	0.0163059	0.902116	0.0504524
2600	284	20200	0.972271	276	65535	0.991612	278	16728	0.967306	932	12436	0.860563	1066	56564	0.963005	986	63764	0.969544		2600	0.977063	0.0128424	0.931037	0.0611206
2550	282	32008	0.982533	280	65535	0.991491	296	18302	0.968169	978	16962	0.89097	1044	48596	0.957937	972	25054	0.925305		2550	0.980731	0.0117653	0.924738	0.0334872
2500	274	55906	0.990246	286	65535	0.99131	282	18532	0.970022	984	16090	0.884737	1036	35598	0.943441	908	46122	0.961386		2500	0.983859	0.0119949	0.929855	0.04009
2450	304	60364	0.989978	292	65535	0.991128	302	22706	0.973748	980	12334	0.852787	1030	37422	0.946427	942	36520	0.949709		2450	0.984952	0.00971939	0.916307	0.0550352
2400	286	28224	0.979937	258	65535	0.992157	264	17782	0.970741	930	13596	0.871954	924	33092	0.945673	916	30532	0.941745		2400	0.980945	0.0107434	0.91979	0.0414744
2350	308	41202	0.98516	276	65535	0.991612	272	20610	0.973949	982	13146	0.860985	952	48656	0.961619	888	17442	0.90311		2350	0.983574	0.00893796	0.908571	0.0505387
2300	296	43174	0.986381	280	65535	0.991491	266	21518	0.975578	886	16990	0.900873	888	42260	0.958839	902	9784	0.831181		2300	0.984484	0.00812441	0.896964	0.0639189
2250	294	38328	0.984776	266	65535	0.991915	268	24870	0.978678	988	32980	0.941828	882	44186	0.960859	896	15152	0.888335		2250	0.985123	0.00662549	0.930341	0.0376019
2200	292	38170	0.984816	258	28284	0.981921	296	24310	0.975941	922	28800	0.937958	884	35440	0.951327	898	16848	0.898794		2200	0.980893	0.0045262	0.92936	0.0273016
2150	292	20106	0.97137	280	57746	0.990349	260	26706	0.980716	976	27114	0.930509	850	27962	0.940997	862	20762	0.920274		2150	0.980812	0.00949006	0.930593	0.0103618
2100	274	22434	0.975868	276	65535	0.991612	280	24722	0.977602	944	29794	0.938578	818	42306	0.962063	880	26656	0.936084		2100	0.981694	0.00863329	0.945575	0.0143335
2050	270	25252	0.978842	286	65535	0.99131	262	38622	0.986524	986	38296	0.949799	804	41602	0.962081	886	23228	0.926516		2050	0.985559	0.00628982	0.946132	0.0180639
2000	282	37880	0.985221	268	65535	0.991854	284	28002	0.979919	990	37466	0.948513	790	47350	0.967179	864	21178	0.921604		2000	0.985665	0.00597992	0.945765	0.0229113
1950	266	60752	0.991281	270	53666	0.989988	264	25448	0.979465	980	32668	0.94175	762	39474	0.962123	782	24204	0.937405		1950	0.986911	0.00648125	0.947093	0.013197
1900	280	33140	0.983244	256	11328	0.955801	278	26612	0.979323	994	35894	0.946107	762	33806	0.955913	824	20246	0.921785		1900	0.972789	0.0148422	0.941268	0.0175713
1850	254	23468	0.978585	268	22646	0.976608	280	47672	0.988322	976	43064	0.955677	770	33468	0.955021	868	18498	0.910358		1850	0.981172	0.00627045	0.940352	0.0259773
1800	256	24130	0.979004	260	20050	0.974397	242	52104	0.990754	1036	45874	0.95583	792	28404	0.945746	872	20668	0.919034		1800	0.981385	0.00843436	0.940204	0.0190138
1750	268	21172	0.975	270	43400	0.987635	274	45414	0.988006	1028	54234	0.962795	732	25622	0.944449	782	23814	0.936412		1750	0.983547	0.00740399	0.947885	0.0135231
1700	250	18818	0.973778	268	16438	0.967916	276	39420	0.986094	1018	43350	0.954111	776	23184	0.935225	846	30590	0.946176		1700	0.975929	0.00927828	0.945171	0.00948291
1650	268	17490	0.969816	270	11816	0.95532	276	32526	0.983172	962	53414	0.964617	766	21232	0.930357	836	26668	0.939209		1650	0.969436	0.0139297	0.944728	0.017784
1600	256	17130	0.970551	272	13772	0.961265	278	37014	0.985091	990	51306	0.962139	804	30372	0.948422	856	35862	0.953374		1600	0.972302	0.0120092	0.954645	0.00694608
1550	258	18800	0.972925	258	28550	0.982088	290	30716	0.981294	980	38434	0.950271	764	20148	0.926932	846	37978	0.956419		1550	0.978769	0.00507683	0.944541	0.0155563
1500	266	17100	0.969365	256	65535	0.992218	282	31790	0.982415	874	50492	0.96597	752	21298	0.931791	852	36694	0.954616		1500	0.981333	0.0114645	0.950792	0.017407
1450	256	19842	0.974525	268	28132	0.981127	264	28538	0.981668	982	65535	0.970474	736	17500	0.919281	846	36164	0.954283		1450	0.979107	0.00397707	0.948012	0.0261663
1400	264	17032	0.969473	256	34958	0.98546	280	24828	0.977696	954	62372	0.96987	698	19236	0.929969	824	36808	0.956207		1400	0.977543	0.00799491	0.952016	0.0202783
1350	258	8490	0.941015	278	52342	0.989434	272	29860	0.981946	942	39174	0.953036	654	31382	0.959171	820	48802	0.96695		1350	0.970798	0.0260633	0.959719	0.00697315
1300	228	51240	0.99114	260	26514	0.980578	256	31806	0.984031	914	47242	0.96204	620	41176	0.970332	786	39686	0.961158		1300	0.98525	0.00538543	0.96451	0.00506118
1250	256	26818	0.981089	250	35694	0.986089	282	28360	0.980309	898	41912	0.958047	622	19322	0.937625	742	37456	0.96115		1250	0.982496	0.00313669	0.952274	0.0127807
1200	246	13038	0.962963	252	23236	0.978542	288	52042	0.988993	948	46226	0.959808	564	25434	0.956612	738	36736	0.960613		1200	0.976833	0.0130989	0.959011	0.00211615
1150	258	7302	0.931746	250	58668	0.991514	280	38396	0.985521	886	48570	0.96417	542	43416	0.97534	760	38438	0.961223		1150	0.969593	0.0329135	0.966911	0.00744717
1100	234	10504	0.956416	260	65535	0.992097	290	39750	0.985514	888	46270	0.962339	532	42754	0.975419	730	35366	0.959552		1100	0.978009	0.0189873	0.96577	0.00847166
1050	250	11186	0.956278	224	45430	0.990187	264	42312	0.987599	886	60324	0.97105	524	23534	0.956439	758	38788	0.961665		1050	0.978021	0.0188744	0.963051	0.00740394
1000	226	9306	0.952581	240	65535	0.992702	286	40564	0.985998	852	55596	0.969813	480	15832	0.941148	746	46134	0.968174		1000	0.977094	0.0214918	0.959712	0.0160977
950	226	17102	0.973915	238	65535	0.992763	250	37990	0.986925	814	52534	0.969483	468	65535	0.985819	712	41270	0.966081		950	0.984534	0.00964867	0.973794	0.0105516
900	250	10924	0.955253	232	65535	0.992945	276	40092	0.986326	800	54448	0.97104	506	17346	0.943312	700	40084	0.965673		900	0.978175	0.0201245	0.960008	0.0147064
850	234	12854	0.964242	224	50666	0.991197	258	40828	0.987441	762	48450	0.969032	506	17534	0.943902	662	41868	0.968869		850	0.98096	0.0145994	0.960601	0.0144617
800	224	11946	0.963188	238	65535	0.992763	270	31000	0.982731	566	41762	0.973256	500	20248	0.951803	594	33354	0.965005		800	0.979561	0.0150401	0.963355	0.0108218
750	220	19502	0.97769	206	65535	0.993733	256	30046	0.983103	352	32218	0.978385	436	32166	0.973253	558	28100	0.961058		750	0.984842	0.00816164	0.970899	0.00890022
700	238	13962	0.966479	198	65535	0.993976	258	28176	0.981853	300	31292	0.981008	372	24920	0.970584	470	58894	0.984165		700	0.980769	0.0137804	0.978586	0.00710756
650	230	13640	0.966835	180	34734	0.989689	226	24274	0.981551	278	35968	0.98466	322	19994	0.968301	426	32604	0.974205		650	0.979358	0.0115837	0.975722	0.00828458
600	222	32184	0.986299	174	38478	0.990997	196	34288	0.988632	280	43896	0.987323	292	22104	0.973924	370	37516	0.980468		600	0.988643	0.00234889	0.980572	0.00670036
550	202	18954	0.97891	188	32360	0.988448	194	31220	0.987649	278	49114	0.988743	250	21800	0.977324	318	42664	0.985203		550	0.985002	0.00529112	0.983757	0.0058452
500	190	19256	0.980459	184	30516	0.988013	182	32114	0.988729	266	65535	0.991915	238	36436	0.987021	272	26224	0.979469		500	0.985734	0.00458226	0.986135	0.00627033
450	180	27372	0.986934	180	18510	0.980738	178	25894	0.986346	266	60942	0.991308	218	32800	0.986795	236	27338	0.982882		450	0.984673	0.00341978	0.986995	0.00421652
400	172	25224	0.986455	174	15604	0.977944	192	28208	0.986479	250	61948	0.991961	218	32894	0.986833	218	26794	0.983859		400	0.983626	0.00492062	0.987551	0.00409855
350	176	23046	0.984842	174	24074	0.985648	180	24932	0.985664	242	65535	0.992642	218	29968	0.985556	220	14846	0.970795		350	0.985385	0.000470205	0.982998	0.0111458
300	174	10180	0.96639	172	27604	0.987615	178	26054	0.986429	262	65535	0.992036	194	26622	0.985531	206	10844	0.962715		300	0.980145	0.0119268	0.980094	0.0153982
250	174	8680	0.960696	170	35208	0.99039	170	23522	0.985649	276	48912	0.988778	194	22180	0.982658	212	16300	0.974322		250	0.978911	0.0159524	0.981919	0.00725631
200	166	13796	0.976221	170	23820	0.985827	176	30272	0.988439	260	39888	0.987048	198	23988	0.983627	216	17100	0.975052		200	0.983496	0.00643409	0.981909	0.00617974
150	170	11614	0.971147	174	42704	0.991884	172	24064	0.985806	246	47442	0.989683	186	26936	0.986284	214	12766	0.967026		150	0.982946	0.0106601	0.980998	0.0122185
100	164	12414	0.973923	162	28190	0.988572	168	35266	0.990518	230	22456	0.979723	174	20896	0.983484	200	13488	0.970777		100	0.984338	0.00907177	0.977995	0.00652712
50	164	11834	0.972662	168	16920	0.980337	164	20712	0.984288	204	3540	0.891026	178	7894	0.955897	196	6402	0.940588		50	0.979096	0.0059116	0.92917	0.0339094
0	168	10534	0.968604	170	18050	0.981339	152	13316	0.977428	180	836	0.645669	172	466	0.460815	190	8440	0.955968		0	0.97579	0.00652361	0.687484	0.250211

## Sheet: EZ organs - Contrast
Testis					Ovary					Kidney					Heart					Eye
relative depth (um)	relative depth (%)	Average	SD		relative depth (um)	relative depth (%)	Average	SD		relative depth (um)	relative depth (%)	Average	SD		relative depth (um)	relative depth (%)	Average	SD		relative depth (um)	relative depth (%)	Average	SD
3818.27	1	0.974315	0.0134438		3766.97	1	0.976199	0.0156727		6222.09	1	0.964969	0.0229542		6101.17	1	0.986513	0.00679508		2825.23	1	0.990989	0.00360238
3814.61	0.99904	0.974423	0.0134778		3763.3	0.999027	0.977329	0.0141753		6218.43	0.999411	0.963993	0.0255142		6097.51	0.999399	0.986374	0.00694164		2821.56	0.998703	0.990686	0.00352982
3810.94	0.998081	0.974754	0.0143314		3759.64	0.998055	0.977847	0.0145051		6214.77	0.998822	0.963015	0.0263613		6093.84	0.998798	0.986494	0.00695697		2817.9	0.997406	0.989974	0.00449214
3807.28	0.997121	0.972307	0.0170229		3755.97	0.997082	0.978269	0.0148583		6211.1	0.998233	0.963079	0.0263432		6090.18	0.998197	0.986988	0.00626408		2814.23	0.996109	0.989144	0.00542791
3803.61	0.996161	0.972146	0.0194697		3752.31	0.996109	0.978363	0.0164214		6207.44	0.997644	0.962232	0.0275496		6086.51	0.997596	0.98686	0.00654863		2810.57	0.994812	0.990199	0.00416195
3799.95	0.995202	0.973487	0.0179985		3748.65	0.995136	0.978108	0.015106		6203.77	0.997055	0.96242	0.0274141		6082.85	0.996995	0.987214	0.00608654		2806.9	0.993515	0.990276	0.00391218
3796.28	0.994242	0.972909	0.0188407		3744.98	0.994163	0.978859	0.0128335		6200.11	0.996466	0.961214	0.0280094		6079.19	0.996394	0.986734	0.00648213		2803.24	0.992218	0.989912	0.00430783
3792.62	0.993282	0.975816	0.0165594		3741.32	0.993191	0.978526	0.012051		6196.44	0.995877	0.961139	0.0271581		6075.52	0.995793	0.986154	0.00685173		2799.58	0.990921	0.991158	0.00406557
3788.95	0.992322	0.976565	0.0139544		3737.65	0.992218	0.977427	0.0122199		6192.78	0.995289	0.963234	0.0239459		6071.86	0.995192	0.986447	0.00699976		2795.91	0.989624	0.991444	0.00465126
3785.29	0.991363	0.977083	0.0117318		3733.99	0.991245	0.976763	0.0137329		6189.11	0.9947	0.961262	0.0253789		6068.19	0.994591	0.986206	0.0071024		2792.25	0.988327	0.992945	0.00302807
3781.63	0.990403	0.977829	0.0117026		3730.33	0.990273	0.975958	0.0144237		6185.45	0.994111	0.962509	0.0230248		6064.53	0.99399	0.985799	0.00673783		2788.58	0.98703	0.993887	0.00158054
3777.96	0.989443	0.978615	0.0114749		3726.66	0.9893	0.975736	0.0152938		6181.79	0.993522	0.960466	0.0247773		6060.86	0.993389	0.985835	0.00601705		2784.92	0.985733	0.994412	0.000611067
3774.3	0.988484	0.978607	0.0126952		3723	0.988327	0.976498	0.0156259		6178.12	0.992933	0.958304	0.0261664		6057.2	0.992788	0.98552	0.00559046		2781.25	0.984436	0.994455	0.000364912
3770.63	0.987524	0.977166	0.0147561		3719.33	0.987354	0.978979	0.0113981		6174.46	0.992344	0.95964	0.0245321		6053.53	0.992187	0.984262	0.00573557		2777.59	0.983139	0.993905	0.00105682
3766.97	0.986564	0.976199	0.0156727		3715.67	0.986381	0.980601	0.00935138		6170.79	0.991755	0.956657	0.0267158		6049.87	0.991587	0.984242	0.0049957		2773.93	0.981842	0.994027	0.00139535
3763.3	0.985605	0.977329	0.0141753		3712	0.985409	0.981251	0.00831466		6167.13	0.991166	0.956528	0.0253666		6046.21	0.990985	0.983792	0.00567301		2770.26	0.980545	0.994011	0.00125388
3759.64	0.984645	0.977847	0.0145051		3708.34	0.984436	0.980248	0.0104906		6163.46	0.990577	0.960246	0.0209169		6042.54	0.990385	0.984444	0.00527375		2766.6	0.979248	0.994579	0.00101971
3755.97	0.983685	0.978269	0.0148583		3704.67	0.983463	0.980727	0.0107297		6159.8	0.989988	0.957894	0.0199105		6038.88	0.989784	0.984579	0.00559198		2762.93	0.977951	0.994467	0.000944689
3752.31	0.982726	0.978363	0.0164214		3701.01	0.98249	0.981789	0.00928459		6156.14	0.989399	0.959342	0.0203694		6035.21	0.989183	0.984404	0.00500678		2759.27	0.976654	0.994031	0.00142835
3748.65	0.981766	0.978108	0.015106		3697.34	0.981517	0.982041	0.00814625		6152.47	0.98881	0.958205	0.0183137		6031.55	0.988582	0.9853	0.00444405		2755.6	0.975357	0.99347	0.00219965
3744.98	0.980806	0.978859	0.0128335		3693.68	0.980545	0.98413	0.00622277		6148.81	0.988221	0.957039	0.0189506		6027.88	0.987981	0.984293	0.00611698		2751.94	0.97406	0.993617	0.00225072
3741.32	0.979847	0.978526	0.012051		3690.02	0.979572	0.984229	0.00612983		6145.14	0.987632	0.959104	0.0175966		6024.22	0.98738	0.985677	0.00544841		2748.27	0.972763	0.993692	0.00186701
3737.65	0.978887	0.977427	0.0122199		3686.35	0.978599	0.984907	0.00526787		6141.48	0.987044	0.958455	0.0183665		6020.56	0.986779	0.98565	0.00631942		2744.61	0.971466	0.993909	0.00145594
3733.99	0.977927	0.976763	0.0137329		3682.69	0.977627	0.98538	0.00536911		6137.81	0.986455	0.959736	0.0171698		6016.89	0.986178	0.986647	0.00587038		2740.95	0.970169	0.994004	0.00137373
3730.33	0.976968	0.975958	0.0144237		3679.02	0.976654	0.985254	0.00474053		6134.15	0.985866	0.958923	0.0179233		6013.23	0.985577	0.986655	0.00605386		2737.28	0.968872	0.994186	0.0012182
3726.66	0.976008	0.975736	0.0152938		3675.36	0.975681	0.984672	0.0059812		6130.48	0.985277	0.960083	0.0208863		6009.56	0.984976	0.986478	0.00651818		2733.62	0.967575	0.993831	0.001516
3723	0.975048	0.976498	0.0156259		3671.7	0.974708	0.984184	0.00652363		6126.82	0.984688	0.959407	0.0181327		6005.9	0.984375	0.987007	0.00592782		2729.95	0.966277	0.994158	0.00121816
3719.33	0.974089	0.978979	0.0113981		3668.03	0.973735	0.983002	0.00718547		6123.16	0.984099	0.958849	0.0184726		6002.23	0.983774	0.988706	0.00540107		2726.29	0.964981	0.994412	0.000560872
3715.67	0.973129	0.980601	0.00935138		3664.37	0.972763	0.981349	0.00835898		6119.49	0.98351	0.959102	0.0166791		5998.57	0.983173	0.989199	0.00491269		2722.62	0.963684	0.994581	0.000214446
3712	0.972169	0.981251	0.00831466		3660.7	0.97179	0.982842	0.00730858		6115.83	0.982921	0.959059	0.0168597		5994.9	0.982572	0.989027	0.00490483		2718.96	0.962386	0.994416	0.000662745
3708.34	0.971209	0.980248	0.0104906		3657.04	0.970817	0.983699	0.00601814		6112.16	0.982332	0.957808	0.0148228		5991.24	0.981971	0.989629	0.00404281		2715.3	0.961089	0.994202	0.000878136
3704.67	0.97025	0.980727	0.0107297		3653.37	0.969844	0.984035	0.00543545		6108.5	0.981743	0.953558	0.0189063		5987.58	0.98137	0.989528	0.00412142		2711.63	0.959793	0.993938	0.00129113
3701.01	0.96929	0.981789	0.00928459		3649.71	0.968872	0.984064	0.00522446		6104.83	0.981154	0.95619	0.016963		5983.91	0.980769	0.989983	0.00346468		2707.97	0.958495	0.993154	0.00294812
3697.34	0.96833	0.982041	0.00814625		3646.04	0.967899	0.986293	0.00424451		6101.17	0.980565	0.957497	0.0153826		5980.25	0.980168	0.99048	0.00314361		2704.3	0.957198	0.99345	0.00228935
3693.68	0.967371	0.98413	0.00622277		3642.38	0.966926	0.987559	0.00398048		6097.51	0.979976	0.958889	0.0151456		5976.58	0.979567	0.990634	0.00294743		2700.64	0.955902	0.994012	0.00125461
3690.02	0.966411	0.984229	0.00612983		3638.71	0.965953	0.988199	0.00472416		6093.84	0.979387	0.959611	0.0132304		5972.92	0.978966	0.990951	0.00337471		2696.97	0.954604	0.993791	0.00184721
3686.35	0.965451	0.984907	0.00526787		3635.05	0.964981	0.989396	0.00355166		6090.18	0.978798	0.962767	0.0114093		5969.25	0.978365	0.990949	0.00236076		2693.31	0.953307	0.993975	0.00169384
3682.69	0.964492	0.98538	0.00536911		3631.39	0.964008	0.989795	0.00366554		6086.51	0.97821	0.962986	0.0107942		5965.59	0.977764	0.99063	0.00285527		2689.64	0.95201	0.994036	0.0011079
3679.02	0.963532	0.985254	0.00474053		3627.72	0.963035	0.989978	0.00380568		6082.85	0.977621	0.963174	0.0128056		5961.93	0.977163	0.990218	0.00250534		2685.98	0.950713	0.994798	0.000104013
3675.36	0.962572	0.984672	0.0059812		3624.06	0.962062	0.990263	0.0048241		6079.18	0.977032	0.963708	0.0133804		5958.26	0.976562	0.989353	0.00327844		2682.32	0.949416	0.994846	0.000371038
3671.7	0.961612	0.984184	0.00652363		3620.39	0.96109	0.989215	0.00463168		6075.52	0.976443	0.962728	0.0141656		5954.6	0.975961	0.988453	0.00345383		2678.65	0.948119	0.994927	0.000426593
3668.03	0.960653	0.983002	0.00718547		3616.73	0.960117	0.988801	0.0038066		6071.85	0.975854	0.960362	0.0159136		5950.93	0.975361	0.988301	0.00312555		2674.99	0.946822	0.994127	0.000913207
3664.37	0.959693	0.981349	0.00835898		3613.07	0.959144	0.988389	0.00334011		6068.19	0.975265	0.960246	0.0154509		5947.27	0.97476	0.98819	0.00265397		2671.32	0.945525	0.993616	0.00227727
3660.7	0.958733	0.982842	0.00730858		3609.4	0.958171	0.989332	0.0031593		6064.53	0.974676	0.958472	0.0167311		5943.6	0.974159	0.988896	0.00171815		2667.66	0.944228	0.99386	0.00146651
3657.04	0.957774	0.983699	0.00601814		3605.74	0.957198	0.99036	0.00160215		6060.86	0.974087	0.958364	0.0169434		5939.94	0.973558	0.988451	0.00191279		2663.99	0.942931	0.994695	0.000629684
3653.37	0.956814	0.984035	0.00543545		3602.07	0.956226	0.990991	0.000795069		6057.2	0.973498	0.956874	0.0165529		5936.27	0.972957	0.988809	0.00163607		2660.33	0.941634	0.994825	0.000121441
3649.71	0.955854	0.984064	0.00522446		3598.41	0.955253	0.991299	0.000780604		6053.53	0.972909	0.957028	0.0149753		5932.61	0.972356	0.988764	0.000879633		2656.66	0.940337	0.994846	3.50582e-05
3646.04	0.954894	0.986293	0.00424451		3594.74	0.95428	0.99174	0.00160245		6049.87	0.97232	0.955449	0.0149276		5928.95	0.971755	0.988961	0.000597196		2653	0.93904	0.994765	0.000105162
3642.38	0.953935	0.987559	0.00398048		3591.08	0.953308	0.990353	0.000659201		6046.2	0.971731	0.957001	0.0109586		5925.28	0.971154	0.989021	0.000967895		2649.34	0.937743	0.994906	0.000152825
3638.71	0.952975	0.988199	0.00472416		3587.41	0.952335	0.990251	0.00118501		6042.54	0.971143	0.956623	0.0132839		5921.62	0.970553	0.989023	0.00135077		2645.67	0.936446	0.994742	9.6277e-05
3635.05	0.952015	0.989396	0.00355166		3583.75	0.951362	0.987552	0.0011641		6038.88	0.970553	0.955438	0.00846271		5917.95	0.969952	0.98971	0.00157289		2642.01	0.935149	0.994561	0.000517885
3631.39	0.951056	0.989795	0.00366554		3580.09	0.950389	0.985306	0.00446425		6035.21	0.969965	0.953368	0.00954566		5914.29	0.969351	0.989381	0.0020073		2638.34	0.933852	0.994132	0.00103324
3627.72	0.950096	0.989978	0.00380568		3576.42	0.949416	0.984529	0.00513742		6031.55	0.969376	0.950362	0.0127473		5910.62	0.96875	0.989979	0.00234546		2634.68	0.932555	0.993574	0.000887427
3624.06	0.949136	0.990263	0.0048241		3572.76	0.948444	0.983727	0.0052354		6027.88	0.968787	0.951063	0.0125758		5906.96	0.968149	0.990308	0.00290511		2631.02	0.931258	0.99413	0.000539187
3620.39	0.948177	0.989215	0.00463168		3569.09	0.947471	0.982618	0.00648887		6024.22	0.968198	0.949673	0.0148038		5903.3	0.967548	0.99079	0.00306533		2627.35	0.929961	0.994341	0.000499589
3616.73	0.947217	0.988801	0.0038066		3565.43	0.946498	0.981124	0.00928315		6020.55	0.967609	0.949254	0.0126136		5899.63	0.966947	0.989722	0.00345661		2623.69	0.928664	0.994149	0.000598042
3613.07	0.946257	0.988389	0.00334011		3561.76	0.945525	0.981346	0.0111384		6016.89	0.96702	0.951788	0.00908738		5895.97	0.966346	0.99003	0.00362602		2620.02	0.927367	0.993889	0.00073449
3609.4	0.945298	0.989332	0.0031593		3558.1	0.944552	0.981815	0.00979146		6013.23	0.966431	0.95273	0.00901161		5892.3	0.965745	0.990131	0.00302334		2616.36	0.92607	0.993995	0.000930293
3605.74	0.944338	0.99036	0.00160215		3554.43	0.94358	0.982313	0.00956587		6009.56	0.965842	0.953819	0.0126879		5888.64	0.965144	0.990733	0.00235602		2612.69	0.924773	0.993157	0.00194595
3602.07	0.943378	0.990991	0.000795069		3550.77	0.942607	0.982088	0.00967579		6005.9	0.965253	0.951638	0.0104004		5884.97	0.964543	0.989829	0.003459		2609.03	0.923476	0.992786	0.00277935
3598.41	0.942418	0.991299	0.000780604		3547.11	0.941634	0.982059	0.0098506		6002.23	0.964664	0.954247	0.00813247		5881.31	0.963942	0.98911	0.005077		2605.36	0.922179	0.99343	0.00256936
3594.74	0.941459	0.99174	0.00160245		3543.44	0.940662	0.982287	0.00936759		5998.57	0.964075	0.952502	0.0105442		5877.65	0.963341	0.989947	0.00398514		2601.7	0.920882	0.993737	0.00152674
3591.08	0.940499	0.990353	0.000659201		3539.78	0.939689	0.982433	0.00911885		5994.9	0.963486	0.951861	0.0110606		5873.98	0.96274	0.990068	0.00317949		2598.04	0.919585	0.993721	0.00186671
3587.41	0.939539	0.990251	0.00118501		3536.11	0.938716	0.983116	0.00889355		5991.24	0.962898	0.954141	0.010411		5870.32	0.962139	0.990034	0.00314603		2594.37	0.918288	0.993977	0.00138606
3583.75	0.93858	0.987552	0.0011641		3532.45	0.937743	0.983725	0.00950687		5987.57	0.962309	0.95447	0.0151446		5866.65	0.961538	0.9909	0.00214498		2590.71	0.916991	0.994259	0.000933426
3580.09	0.93762	0.985306	0.00446425		3528.78	0.93677	0.983958	0.0098708		5983.91	0.96172	0.954531	0.0119094		5862.99	0.960937	0.991049	0.00256658		2587.04	0.915694	0.994165	0.00115867
3576.42	0.93666	0.984529	0.00513742		3525.12	0.935798	0.983425	0.0101055		5980.24	0.961131	0.954577	0.0138347		5859.32	0.960336	0.991171	0.00198866		2583.38	0.914397	0.994386	0.000738847
3572.76	0.935701	0.983727	0.0052354		3521.46	0.934825	0.983502	0.00960157		5976.58	0.960542	0.953788	0.0179471		5855.66	0.959736	0.991406	0.00237761		2579.71	0.9131	0.9944	0.00102176
3569.09	0.934741	0.982618	0.00648887		3517.79	0.933852	0.983984	0.00991816		5972.92	0.959953	0.955937	0.0197704		5851.99	0.959135	0.991345	0.00248171		2576.05	0.911803	0.994074	0.00141162
3565.43	0.933781	0.981124	0.00928315		3514.13	0.932879	0.984642	0.00969321		5969.25	0.959364	0.955164	0.019916		5848.33	0.958534	0.990966	0.00268631		2572.39	0.910506	0.99442	0.000411565
3561.76	0.932822	0.981346	0.0111384		3510.46	0.931907	0.984494	0.0092015		5965.59	0.958775	0.957375	0.0201298		5844.66	0.957933	0.990758	0.00310199		2568.72	0.909209	0.994987	0.000245422
3558.1	0.931862	0.981815	0.00979146		3506.8	0.930934	0.984368	0.00977349		5961.92	0.958186	0.955888	0.0224768		5841	0.957332	0.990194	0.00358582		2565.06	0.907912	0.994744	0.000185495
3554.43	0.930902	0.982313	0.00956587		3503.13	0.929961	0.984628	0.00936652		5958.26	0.957597	0.956421	0.0278091		5837.34	0.956731	0.989757	0.00393602		2561.39	0.906615	0.99494	0.000221659
3550.77	0.929943	0.982088	0.00967579		3499.47	0.928989	0.985492	0.00853515		5954.6	0.957008	0.957694	0.025976		5833.67	0.95613	0.989437	0.00507048		2557.73	0.905318	0.994455	0.0006075
3547.11	0.928983	0.982059	0.0098506		3495.8	0.928016	0.986128	0.00726294		5950.93	0.956419	0.954115	0.0317895		5830.01	0.955529	0.988889	0.00489212		2554.06	0.904021	0.994221	0.000892852
3543.44	0.928023	0.982287	0.00936759		3492.14	0.927043	0.985958	0.00756485		5947.27	0.95583	0.953521	0.0334705		5826.34	0.954928	0.988706	0.00496485		2550.4	0.902724	0.99437	0.000694326
3539.78	0.927064	0.982433	0.00911885		3488.48	0.92607	0.986988	0.00677827		5943.6	0.955241	0.95242	0.0318085		5822.68	0.954327	0.988547	0.00447		2546.73	0.901427	0.99464	0.000401937
3536.11	0.926104	0.983116	0.00889355		3484.81	0.925097	0.986909	0.00698607		5939.94	0.954652	0.947211	0.0355167		5819.02	0.953726	0.988315	0.00461588		2543.07	0.90013	0.994744	9.27435e-05
3532.45	0.925144	0.983725	0.00950687		3481.15	0.924125	0.985796	0.00784124		5936.27	0.954064	0.945556	0.0332951		5815.35	0.953125	0.988777	0.0043446		2539.41	0.898833	0.994825	0.000105174
3528.78	0.924184	0.983958	0.0098708		3477.48	0.923152	0.98408	0.00981332		5932.61	0.953475	0.945707	0.0292625		5811.69	0.952524	0.98891	0.00413813		2535.74	0.897536	0.995048	0.000355838
3525.12	0.923225	0.983425	0.0101055		3473.82	0.922179	0.981983	0.0124783		5928.94	0.952886	0.945135	0.0336138		5808.02	0.951923	0.989013	0.00485211		2532.08	0.896239	0.994658	0.000378642
3521.46	0.922265	0.983502	0.00960157		3470.16	0.921206	0.983183	0.0144408		5925.28	0.952297	0.949982	0.0310205		5804.36	0.951322	0.989033	0.00443296		2528.41	0.894942	0.994534	0.000981394
3517.79	0.921305	0.983984	0.00991816		3466.49	0.920233	0.982208	0.0127734		5921.62	0.951708	0.946992	0.0331906		5800.69	0.950721	0.9898	0.00399942		2524.75	0.893645	0.993936	0.00146744
3514.13	0.920346	0.984642	0.00969321		3462.83	0.919261	0.982629	0.0121446		5917.95	0.951119	0.948532	0.0289033		5797.03	0.95012	0.99	0.00372179		2521.08	0.892348	0.993544	0.00216693
3510.46	0.919386	0.984494	0.0092015		3459.16	0.918288	0.9835	0.0113398		5914.29	0.95053	0.951838	0.0243614		5793.36	0.949519	0.990096	0.00454144		2517.42	0.89105	0.993826	0.00162749
3506.8	0.918426	0.984368	0.00977349		3455.5	0.917315	0.983458	0.0119692		5910.62	0.949941	0.953313	0.0206424		5789.7	0.948918	0.990628	0.00459486		2513.76	0.889754	0.994127	0.00121083
3503.13	0.917467	0.984628	0.00936652		3451.83	0.916343	0.984985	0.00989866		5906.96	0.949352	0.953703	0.0189772		5786.03	0.948317	0.9913	0.00404023		2510.09	0.888456	0.99408	0.00156826
3499.47	0.916507	0.985492	0.00853515		3448.17	0.91537	0.98611	0.00842015		5903.29	0.948763	0.953491	0.0129468		5782.37	0.947716	0.991135	0.00452519		2506.43	0.887159	0.993843	0.00159666
3495.8	0.915547	0.986128	0.00726294		3444.5	0.914397	0.986869	0.00724392		5899.63	0.948174	0.954424	0.0119438		5778.71	0.947115	0.991001	0.00489145		2502.76	0.885863	0.993532	0.00218889
3492.14	0.914587	0.985958	0.00756485		3440.84	0.913424	0.98733	0.00671957		5895.97	0.947585	0.953908	0.011245		5775.04	0.946514	0.990637	0.00515789		2499.1	0.884565	0.993913	0.00148669
3488.48	0.913628	0.986988	0.00677827		3437.17	0.912451	0.987964	0.00653875		5892.3	0.946996	0.953295	0.0109942		5771.38	0.945913	0.991584	0.00351365		2495.43	0.883268	0.993972	0.00159324
3484.81	0.912668	0.986909	0.00698607		3433.51	0.911479	0.988128	0.00627178		5888.64	0.946407	0.95295	0.0123767		5767.71	0.945312	0.990843	0.00496697		2491.77	0.881972	0.99381	0.00191618
3481.15	0.911708	0.985796	0.00784124		3429.85	0.910506	0.987997	0.00657015		5884.97	0.945819	0.953326	0.0119253		5764.05	0.944712	0.99113	0.00380054		2488.1	0.880674	0.994374	0.000782343
3477.48	0.910749	0.98408	0.00981332		3426.18	0.909533	0.987799	0.00665751		5881.31	0.94523	0.953365	0.0107576		5760.39	0.944111	0.991167	0.00348028		2484.44	0.879377	0.994749	0.000396007
3473.82	0.909789	0.981983	0.0124783		3422.52	0.90856	0.988949	0.00499971		5877.64	0.944641	0.955599	0.011814		5756.72	0.94351	0.991193	0.00343266		2480.78	0.878081	0.994694	0.000223915
3470.16	0.908829	0.983183	0.0144408		3418.85	0.907588	0.988526	0.00550895		5873.98	0.944052	0.954502	0.0136004		5753.06	0.942909	0.991004	0.00254438		2477.11	0.876783	0.994618	0.000249356
3466.49	0.90787	0.982208	0.0127734		3415.19	0.906615	0.989166	0.00483974		5870.31	0.943463	0.954842	0.0120947		5749.39	0.942308	0.990897	0.00223568		2473.45	0.875486	0.993764	0.00130509
3462.83	0.90691	0.982629	0.0121446		3411.53	0.905642	0.989525	0.00470953		5866.65	0.942874	0.9544	0.0145585		5745.73	0.941707	0.990995	0.00250915		2469.78	0.874189	0.994437	0.000857165
3459.16	0.90595	0.9835	0.0113398		3407.86	0.904669	0.989034	0.00513674		5862.99	0.942285	0.95238	0.01615		5742.06	0.941106	0.990923	0.00221727		2466.12	0.872892	0.994519	0.000478363
3455.5	0.90499	0.983458	0.0119692		3404.2	0.903697	0.988251	0.00569362		5859.32	0.941696	0.95598	0.0126882		5738.4	0.940505	0.99063	0.00232473		2462.45	0.871595	0.994726	0.000243971
3451.83	0.904031	0.984985	0.00989866		3400.53	0.902724	0.987233	0.00652316		5855.66	0.941107	0.955283	0.0136715		5734.73	0.939904	0.991402	0.00245704		2458.79	0.870298	0.994797	0.000130945
3448.17	0.903071	0.98611	0.00842015		3396.87	0.901751	0.986672	0.0071755		5851.99	0.940518	0.959077	0.011699		5731.07	0.939303	0.991314	0.00245653		2455.12	0.869001	0.994696	0.000392634
3444.5	0.902111	0.986869	0.00724392		3393.2	0.900778	0.986445	0.00755874		5848.33	0.939929	0.956942	0.0132393		5727.41	0.938702	0.991423	0.00279083		2451.46	0.867704	0.994744	3.50539e-05
3440.84	0.901152	0.98733	0.00671957		3389.54	0.899806	0.985544	0.00877182		5844.66	0.93934	0.956894	0.0128989		5723.74	0.938101	0.991483	0.00269145		2447.8	0.866407	0.994947	0.000121456
3437.17	0.900192	0.987964	0.00653875		3385.87	0.898833	0.986344	0.00831909		5841	0.938751	0.961104	0.00958018		5720.08	0.9375	0.991547	0.00314642		2444.13	0.86511	0.994906	0.000126407
3433.51	0.899232	0.988128	0.00627178		3382.21	0.89786	0.987535	0.00787407		5837.34	0.938162	0.961759	0.010246		5716.41	0.936899	0.991325	0.00317855		2440.47	0.863813	0.994886	0.00026471
3429.85	0.898273	0.987997	0.00657015		3378.54	0.896887	0.987976	0.00829005		5833.67	0.937574	0.963177	0.00757075		5712.75	0.936298	0.991532	0.00366588		2436.8	0.862516	0.994785	0.000126392
3426.18	0.897313	0.987799	0.00665751		3374.88	0.895914	0.987684	0.00831978		5830.01	0.936985	0.964627	0.00906326		5709.08	0.935697	0.991484	0.00382426		2433.14	0.861219	0.994846	0.000185503
3422.52	0.896353	0.988949	0.00499971		3371.22	0.894942	0.988051	0.00792338		5826.34	0.936396	0.961992	0.00972044		5705.42	0.935096	0.992208	0.00249801		2429.47	0.859922	0.994825	0.000182162
3418.85	0.895394	0.988526	0.00550895		3367.55	0.893969	0.987588	0.00911701		5822.68	0.935807	0.962616	0.00931898		5701.76	0.934495	0.992562	0.00226761		2425.81	0.858625	0.99452	0.000238437
3415.19	0.894434	0.989166	0.00483974		3363.89	0.892996	0.987261	0.00960241		5819.01	0.935218	0.960784	0.00825606		5698.09	0.933894	0.993314	0.00126504		2422.15	0.857328	0.994118	0.000666767
3411.53	0.893474	0.989525	0.00470953		3360.22	0.892024	0.986279	0.0104468		5815.35	0.934629	0.961358	0.00760679		5694.43	0.933293	0.993213	0.000671927		2418.48	0.856031	0.993582	0.00203629
3407.86	0.892514	0.989034	0.00513674		3356.56	0.891051	0.985174	0.011354		5811.69	0.93404	0.963995	0.00706045		5690.76	0.932692	0.993897	0.000461329		2414.82	0.854734	0.993731	0.00156663
3404.2	0.891555	0.988251	0.00569362		3352.89	0.890078	0.985359	0.0105245		5808.02	0.933451	0.960985	0.0096787		5687.1	0.932091	0.994057	0.000350336		2411.15	0.853437	0.993727	0.00108716
3400.53	0.890595	0.987233	0.00652316		3349.23	0.889105	0.985638	0.0107868		5804.36	0.932862	0.961904	0.010344		5683.43	0.93149	0.994016	0.000494206		2407.49	0.85214	0.994297	0.000922128
3396.87	0.889635	0.986672	0.0071755		3345.57	0.888132	0.98697	0.00944185		5800.69	0.932273	0.959635	0.0115852		5679.77	0.930889	0.993955	0.000213055		2403.82	0.850843	0.994417	0.000867139
3393.2	0.888676	0.986445	0.00755874		3341.9	0.88716	0.987397	0.00767174		5797.03	0.931684	0.960071	0.0112597		5676.1	0.930288	0.993976	0.000218754		2400.16	0.849546	0.994087	0.00138371
3389.54	0.887716	0.985544	0.00877182		3338.24	0.886187	0.988381	0.00716757		5793.36	0.931095	0.956954	0.0146793		5672.44	0.929687	0.993875	0.00048655		2396.5	0.848249	0.993857	0.00107807
3385.87	0.886756	0.986344	0.00831909		3334.57	0.885214	0.989542	0.00459294		5789.7	0.930506	0.954349	0.0131819		5668.78	0.929086	0.993794	0.000337714		2392.83	0.846952	0.993041	0.00143637
3382.21	0.885797	0.987535	0.00787407		3330.91	0.884241	0.988734	0.00570188		5786.03	0.929917	0.955601	0.0116884		5665.11	0.928486	0.994057	0.000299322		2389.17	0.845655	0.993267	0.00117262
3378.54	0.884837	0.987976	0.00829005		3327.24	0.883268	0.989089	0.00471161		5782.37	0.929329	0.957031	0.0105286		5661.45	0.927885	0.993915	0.000397826		2385.5	0.844358	0.993757	0.000881344
3374.88	0.883877	0.987684	0.00831978		3323.58	0.882296	0.990025	0.00414777		5778.7	0.92874	0.958118	0.00743925		5657.78	0.927284	0.99379	0.000332424		2381.84	0.843061	0.99405	0.00106321
3371.22	0.882918	0.988051	0.00792338		3319.92	0.881323	0.990421	0.0037498		5775.04	0.928151	0.958902	0.00680685		5654.12	0.926683	0.993118	0.000976676		2378.17	0.841764	0.994387	0.000826704
3367.55	0.881958	0.987588	0.00911701		3316.25	0.88035	0.990666	0.00398712		5771.38	0.927562	0.959139	0.00713749		5650.45	0.926082	0.992861	0.00188351		2374.51	0.840467	0.99448	0.000546245
3363.89	0.880998	0.987261	0.00960241		3312.59	0.879378	0.990769	0.00366134		5767.71	0.926973	0.961737	0.0065644		5646.79	0.925481	0.992463	0.00225334		2370.85	0.83917	0.994534	0.000565152
3360.22	0.880039	0.986279	0.0104468		3308.92	0.878405	0.991101	0.00319688		5764.05	0.926384	0.960549	0.00659453		5643.12	0.92488	0.991913	0.00294183		2367.18	0.837873	0.994164	0.000895143
3356.56	0.879079	0.985174	0.011354		3305.26	0.877432	0.99114	0.00322305		5760.38	0.925795	0.961402	0.0071767		5639.46	0.924279	0.991428	0.00384859		2363.52	0.836576	0.994418	0.000658763
3352.89	0.878119	0.985359	0.0105245		3301.59	0.876459	0.991402	0.00312219		5756.72	0.925206	0.960702	0.00631253		5635.8	0.923678	0.991308	0.00409931		2359.85	0.835279	0.994654	0.0012655
3349.23	0.87716	0.985638	0.0107868		3297.93	0.875486	0.991164	0.00338365		5753.06	0.924617	0.960223	0.00737477		5632.13	0.923077	0.991331	0.00416118		2356.19	0.833982	0.994372	0.000785206
3345.57	0.8762	0.98697	0.00944185		3294.26	0.874514	0.991807	0.00307916		5749.39	0.924028	0.961037	0.00906084		5628.47	0.922476	0.990875	0.00479385		2352.52	0.832685	0.993678	0.00112502
3341.9	0.87524	0.987397	0.00767174		3290.6	0.873541	0.991419	0.00294065		5745.73	0.923439	0.958871	0.00837363		5624.8	0.921875	0.991492	0.0043678		2348.86	0.831388	0.993615	0.000948641
3338.24	0.87428	0.988381	0.00716757		3286.94	0.872568	0.991658	0.00284637		5742.06	0.92285	0.958665	0.00944377		5621.14	0.921274	0.991412	0.00360272		2345.19	0.830091	0.99386	0.000760741
3334.57	0.873321	0.989542	0.00459294		3283.27	0.871595	0.991884	0.00260841		5738.4	0.922261	0.959979	0.00977784		5617.48	0.920673	0.991812	0.002808		2341.53	0.828794	0.994024	0.000707112
3330.91	0.872361	0.988734	0.00570188		3279.61	0.870623	0.991979	0.00247324		5734.73	0.921673	0.959423	0.00915161		5613.81	0.920072	0.99193	0.00254959		2337.87	0.827497	0.994441	4.73343e-05
3327.24	0.871401	0.989089	0.00471161		3275.94	0.86965	0.991935	0.00291712		5731.07	0.921084	0.960982	0.00920152		5610.15	0.919471	0.992267	0.00228246		2334.2	0.8262	0.993954	0.000781419
3323.58	0.870442	0.990025	0.00414777		3272.28	0.868677	0.991792	0.00269876		5727.4	0.920495	0.960092	0.00989077		5606.48	0.91887	0.99264	0.00202047		2330.54	0.824903	0.994236	0.000979647
3319.92	0.869482	0.990421	0.0037498		3268.61	0.867704	0.992121	0.00236325		5723.74	0.919906	0.960384	0.0101201		5602.82	0.918269	0.992748	0.00132296		2326.87	0.823606	0.994323	0.000845102
3316.25	0.868522	0.990666	0.00398712		3264.95	0.866732	0.991709	0.00286432		5720.07	0.919317	0.960789	0.0109411		5599.15	0.917668	0.992934	0.00147983		2323.21	0.822309	0.994279	0.000689118
3312.59	0.867563	0.990769	0.00366134		3261.29	0.865759	0.991558	0.00313725		5716.41	0.918728	0.961426	0.013223		5595.49	0.917067	0.992794	0.00107333		2319.54	0.821011	0.99487	0.000663484
3308.92	0.866603	0.991101	0.00319688		3257.62	0.864786	0.991895	0.0027489		5712.75	0.918139	0.96148	0.0150906		5591.82	0.916466	0.992673	0.00149547		2315.88	0.819715	0.994389	0.000918087
3305.26	0.865643	0.99114	0.00322305		3253.96	0.863813	0.991651	0.00300174		5709.08	0.91755	0.958925	0.0192824		5588.16	0.915865	0.992336	0.0015526		2312.22	0.818418	0.994291	0.000738657
3301.59	0.864683	0.991402	0.00312219		3250.29	0.862841	0.991796	0.00304338		5705.42	0.916961	0.961149	0.0154905		5584.49	0.915264	0.992433	0.00177478		2308.55	0.81712	0.994338	0.000619004
3297.93	0.863724	0.991164	0.00338365		3246.63	0.861868	0.991586	0.00291013		5701.75	0.916372	0.96205	0.0145108		5580.83	0.914663	0.991715	0.00195822		2304.89	0.815824	0.994465	0.000709668
3294.26	0.862764	0.991807	0.00307916		3242.96	0.860895	0.99098	0.00341799		5698.09	0.915783	0.963619	0.0141455		5577.17	0.914062	0.991333	0.00313763		2301.22	0.814527	0.994539	0.000659454
3290.6	0.861804	0.991419	0.00294065		3239.3	0.859922	0.991291	0.00297996		5694.43	0.915194	0.96191	0.019351		5573.5	0.913462	0.990921	0.00306853		2297.56	0.813229	0.99463	0.000599973
3286.94	0.860845	0.991658	0.00284637		3235.63	0.858949	0.991888	0.00291989		5690.76	0.914605	0.959593	0.0190778		5569.84	0.91286	0.991076	0.00299389		2293.89	0.811933	0.994489	0.000594685
3283.27	0.859885	0.991884	0.00260841		3231.97	0.857977	0.992481	0.00239712		5687.1	0.914016	0.959357	0.0201059		5566.17	0.91226	0.991736	0.00200459		2290.23	0.810636	0.994501	0.000405205
3279.61	0.858925	0.991979	0.00247324		3228.31	0.857004	0.992836	0.00207188		5683.43	0.913428	0.95805	0.02035		5562.51	0.911659	0.99162	0.001934		2286.56	0.809338	0.994474	0.000932408
3275.94	0.857965	0.991935	0.00291712		3224.64	0.856031	0.992929	0.0019209		5679.77	0.912839	0.959528	0.0197892		5558.85	0.911058	0.992215	0.00131722		2282.9	0.808042	0.994215	0.00100923
3272.28	0.857006	0.991792	0.00269876		3220.98	0.855058	0.993413	0.00258505		5676.1	0.91225	0.961315	0.0172081		5555.18	0.910457	0.992778	0.00135226		2279.24	0.806744	0.994191	0.000819561
3268.61	0.856046	0.992121	0.00236325		3217.31	0.854086	0.99272	0.00205493		5672.44	0.911661	0.963602	0.0150205		5551.52	0.909856	0.992567	0.00103621		2275.57	0.805447	0.994157	0.00110824
3264.95	0.855086	0.991709	0.00286432		3213.65	0.853113	0.992831	0.00183111		5668.77	0.911072	0.962895	0.0146311		5547.85	0.909255	0.992714	0.0011084		2271.91	0.804151	0.994198	0.000883887
3261.29	0.854127	0.991558	0.00313725		3209.98	0.85214	0.993113	0.00169363		5665.11	0.910483	0.96163	0.0160234		5544.19	0.908654	0.992817	0.00137573		2268.24	0.802853	0.994372	0.000748902
3257.62	0.853167	0.991895	0.0027489		3206.32	0.851167	0.993088	0.00170462		5661.45	0.909894	0.961543	0.0155792		5540.52	0.908053	0.992698	0.00157646		2264.58	0.801556	0.994673	0.000140428
3253.96	0.852207	0.991651	0.00300174		3202.66	0.850195	0.993628	0.0013748		5657.78	0.909305	0.962551	0.0136833		5536.86	0.907452	0.992744	0.0016191		2260.91	0.80026	0.994886	0.000218954
3250.29	0.851248	0.991796	0.00304338		3198.99	0.849222	0.993184	0.00219145		5654.12	0.908716	0.962416	0.014223		5533.19	0.906851	0.992842	0.00189253		2257.25	0.798962	0.994947	0.000160678
3246.63	0.850288	0.991586	0.00291013		3195.33	0.848249	0.993319	0.00203791		5650.45	0.908127	0.961392	0.0138814		5529.53	0.90625	0.992565	0.00196089		2253.59	0.797665	0.994866	0.000126409
3242.96	0.849328	0.99098	0.00341799		3191.66	0.847276	0.993506	0.00197215		5646.79	0.907538	0.962155	0.0124734		5525.86	0.905649	0.992449	0.00214706		2249.92	0.796368	0.994866	7.01184e-05
3239.3	0.848369	0.991291	0.00297996		3188	0.846303	0.993867	0.00159708		5643.12	0.906949	0.963861	0.0101118		5522.2	0.905048	0.992767	0.00218466		2246.26	0.795071	0.994589	0.000198842
3235.63	0.847409	0.991888	0.00291989		3184.33	0.845331	0.994167	0.00135078		5639.46	0.90636	0.961017	0.010934		5518.54	0.904447	0.992529	0.00167395		2242.59	0.793774	0.99464	0.000164022
3231.97	0.846449	0.992481	0.00239712		3180.67	0.844358	0.994375	0.00166298		5635.8	0.905771	0.961271	0.0090502		5514.87	0.903846	0.992211	0.00171287		2238.93	0.792477	0.994866	0.000185518
3228.31	0.845489	0.992836	0.00207188		3177	0.843385	0.993857	0.00175369		5632.13	0.905183	0.956702	0.0114332		5511.21	0.903245	0.992013	0.00219113		2235.26	0.79118	0.995129	0.000482159
3224.64	0.84453	0.992929	0.0019209		3173.34	0.842413	0.993287	0.00220348		5628.47	0.904594	0.958554	0.00898517		5507.54	0.902644	0.991668	0.00163083		2231.6	0.789883	0.994683	0.000126996
3220.98	0.84357	0.993413	0.00258505		3169.68	0.84144	0.992828	0.00250628		5624.8	0.904005	0.958102	0.00954702		5503.88	0.902043	0.991005	0.00247015		2227.93	0.788586	0.994765	0.000160636
3217.31	0.84261	0.99272	0.00205493		3166.01	0.840467	0.992969	0.00216991		5621.14	0.903416	0.958549	0.0101368		5500.22	0.901442	0.991157	0.0025863		2224.27	0.787289	0.994846	0.000185503
3213.65	0.841651	0.992831	0.00183111		3162.35	0.839494	0.993594	0.00117676		5617.47	0.902827	0.957116	0.00930846		5496.55	0.900841	0.990551	0.00279562		2220.61	0.785992	0.994876	0.000150071
3209.98	0.840691	0.993113	0.00169363		3158.68	0.838522	0.993712	0.00119425		5613.81	0.902238	0.954562	0.0122453		5492.89	0.90024	0.990173	0.00367076		2216.94	0.784695	0.994577	0.000805255
3206.32	0.839731	0.993088	0.00170462		3155.02	0.837549	0.993941	0.00109368		5610.14	0.901649	0.953034	0.0133282		5489.22	0.899639	0.990173	0.00334619		2213.28	0.783398	0.994532	0.000441611
3202.66	0.838772	0.993628	0.0013748		3151.36	0.836576	0.994046	0.00080769		5606.48	0.90106	0.95656	0.0106592		5485.56	0.899038	0.990124	0.0033369		2209.61	0.782101	0.994713	0.000166505
3198.99	0.837812	0.993184	0.00219145		3147.69	0.835603	0.993872	0.0010839		5602.82	0.900471	0.9566	0.0138888		5481.89	0.898438	0.990284	0.00318213		2205.95	0.780804	0.994824	0.000122913
3195.33	0.836852	0.993319	0.00203791		3144.03	0.83463	0.994238	0.00144157		5599.15	0.899882	0.95793	0.0149173		5478.23	0.897836	0.990465	0.00367593		2202.28	0.779507	0.994825	0.000264656
3191.66	0.835893	0.993506	0.00197215		3140.36	0.833658	0.994157	0.00108558		5595.49	0.899293	0.960057	0.0113681		5474.56	0.897236	0.990038	0.00447001		2198.62	0.77821	0.994886	0.000182173
3188	0.834933	0.993867	0.00159708		3136.7	0.832685	0.994452	0.000542048		5591.82	0.898704	0.960629	0.0122231		5470.9	0.896635	0.989633	0.00472451		2194.96	0.776913	0.994846	9.27556e-05
3184.33	0.833973	0.994167	0.00135078		3133.03	0.831712	0.994393	0.000696658		5588.16	0.898115	0.961704	0.0143656		5467.24	0.896034	0.990249	0.00422248		2191.29	0.775616	0.994947	0.000182184
3180.67	0.833014	0.994375	0.00166298		3129.37	0.830739	0.994444	0.000823786		5584.49	0.897526	0.965722	0.0132489		5463.57	0.895433	0.989862	0.00435665		2187.63	0.774319	0.994617	0.000193169
3177	0.832054	0.993857	0.00175369		3125.7	0.829767	0.99427	0.000909636		5580.83	0.896938	0.964886	0.0137486		5459.91	0.894832	0.989881	0.00443737		2183.96	0.773022	0.994383	0.000467601
3173.34	0.831094	0.993287	0.00220348		3122.04	0.828794	0.994709	0.000270325		5577.16	0.896349	0.967482	0.0134218		5456.24	0.894231	0.990356	0.00387246		2180.3	0.771725	0.994731	0.000188075
3169.68	0.830135	0.992828	0.00250628		3118.38	0.827821	0.994552	0.000526636		5573.5	0.89576	0.967296	0.0137668		5452.58	0.89363	0.990099	0.00425629		2176.63	0.770428	0.994825	0.000218922
3166.01	0.829175	0.992969	0.00216991		3114.71	0.826848	0.994643	0.000580186		5569.84	0.895171	0.967416	0.0130597		5448.91	0.893029	0.990123	0.0044148		2172.97	0.769131	0.994967	7.01227e-05
3162.35	0.828215	0.993594	0.00117676		3111.05	0.825876	0.994089	0.00106742		5566.17	0.894582	0.968357	0.0124725		5445.25	0.892428	0.990462	0.0041755		2169.3	0.767834	0.994906	0.000175291
3158.68	0.827255	0.993712	0.00119425		3107.38	0.824903	0.993483	0.00243329		5562.51	0.893993	0.967967	0.0121877		5441.59	0.891827	0.990513	0.00392996		2165.64	0.766537	0.994906	0.000126407
3155.02	0.826296	0.993941	0.00109368		3103.72	0.82393	0.993369	0.00267961		5558.84	0.893404	0.967344	0.0108701		5437.92	0.891226	0.991268	0.00276875		2161.98	0.76524	0.994805	0.000152805
3151.36	0.825336	0.994046	0.00080769		3100.05	0.822957	0.99339	0.00254266		5555.18	0.892815	0.968302	0.0098073		5434.26	0.890625	0.991562	0.00239316		2158.31	0.763943	0.994886	0.000278262
3147.69	0.824376	0.993872	0.0010839		3096.39	0.821984	0.993452	0.0023789		5551.52	0.892226	0.968139	0.00857758		5430.59	0.890024	0.991725	0.00197056		2154.65	0.762646	0.994886	6.07244e-05
3144.03	0.823417	0.994238	0.00144157		3092.72	0.821012	0.993536	0.00228675		5547.85	0.891637	0.96626	0.0110261		5426.93	0.889423	0.991738	0.00204665		2150.98	0.761349	0.994588	0.000311363
3140.36	0.822457	0.994157	0.00108558		3089.06	0.820039	0.993642	0.00199643		5544.19	0.891048	0.965518	0.0125048		5423.26	0.888822	0.991522	0.00204513		2147.32	0.760052	0.994388	0.000815349
3136.7	0.821497	0.994452	0.000542048		3085.4	0.819066	0.993454	0.00248165		5540.52	0.890459	0.96438	0.0129326		5419.6	0.888221	0.990791	0.00258934		2143.65	0.758755	0.994342	0.000845834
3133.03	0.820538	0.994393	0.000696658		3081.73	0.818093	0.993421	0.00248679		5536.86	0.88987	0.964651	0.0137782		5415.93	0.88762	0.991276	0.00233781		2139.99	0.757458	0.994238	0.000872457
3129.37	0.819578	0.994444	0.000823786		3078.07	0.817121	0.993605	0.00206191		5533.19	0.889281	0.962817	0.0131893		5412.27	0.887019	0.991083	0.00185816		2136.33	0.756161	0.994244	0.00081714
3125.7	0.818618	0.99427	0.000909636		3074.4	0.816148	0.993742	0.00203936		5529.53	0.888692	0.960673	0.0137925		5408.61	0.886418	0.990946	0.00193876		2132.66	0.754864	0.994235	0.000747122
3122.04	0.817658	0.994709	0.000270325		3070.74	0.815175	0.993678	0.00209331		5525.86	0.888104	0.959453	0.0130631		5404.94	0.885817	0.990872	0.00244586		2129	0.753567	0.994312	0.000793817
3118.38	0.816699	0.994552	0.000526636		3067.07	0.814202	0.994038	0.00159333		5522.2	0.887515	0.957695	0.00958514		5401.28	0.885216	0.990681	0.00242665		2125.33	0.75227	0.994405	0.00109687
3114.71	0.815739	0.994643	0.000580186		3063.41	0.81323	0.994355	0.000763231		5518.53	0.886926	0.959398	0.00756138		5397.61	0.884615	0.99075	0.00261213		2121.67	0.750973	0.99438	0.000632305
3111.05	0.814779	0.994089	0.00106742		3059.75	0.812257	0.994487	0.000586809		5514.87	0.886337	0.959953	0.00960253		5393.95	0.884014	0.990338	0.00264177		2118	0.749676	0.994524	0.00057618
3107.38	0.81382	0.993483	0.00243329		3056.08	0.811284	0.994031	0.00138051		5511.21	0.885748	0.960612	0.010385		5390.28	0.883413	0.990594	0.00281523		2114.34	0.748379	0.994844	0.000793556
3103.72	0.81286	0.993369	0.00267961		3052.42	0.810311	0.993654	0.00143165		5507.54	0.885159	0.961654	0.00955648		5386.62	0.882812	0.990742	0.00185809		2110.68	0.747082	0.994633	0.000492354
3100.05	0.8119	0.99339	0.00254266		3048.75	0.809339	0.993399	0.00168239		5503.88	0.88457	0.963353	0.00882566		5382.95	0.882212	0.991493	0.00175859		2107.01	0.745785	0.994484	0.000501756
3096.39	0.810941	0.993452	0.0023789		3045.09	0.808366	0.993655	0.00186795		5500.21	0.883981	0.964403	0.00917819		5379.29	0.88161	0.991364	0.00178402		2103.35	0.744488	0.994906	0.000334456
3092.72	0.809981	0.993536	0.00228675		3041.42	0.807393	0.993831	0.00145712		5496.55	0.883392	0.962595	0.00844504		5375.63	0.88101	0.991592	0.00147829		2099.68	0.74319	0.994866	0.000140228
3089.06	0.809021	0.993642	0.00199643		3037.76	0.80642	0.994373	0.000892687		5492.89	0.882803	0.962345	0.00899354		5371.96	0.880409	0.992186	0.00126517		2096.02	0.741894	0.995048	0.000494718
3085.4	0.808061	0.993454	0.00248165		3034.09	0.805448	0.99434	0.00100224		5489.22	0.882214	0.961054	0.0111391		5368.3	0.879808	0.992366	0.00107915		2092.35	0.740597	0.994886	0.000398214
3081.73	0.807102	0.993421	0.00248679		3030.43	0.804475	0.994642	0.000909102		5485.56	0.881625	0.95893	0.0115515		5364.63	0.879207	0.992321	0.00171743		2088.69	0.739299	0.994846	0.000213251
3078.07	0.806142	0.993605	0.00206191		3026.77	0.803502	0.994479	0.000521131		5481.89	0.881037	0.956605	0.0129962		5360.97	0.878606	0.992105	0.00135833		2085.02	0.738003	0.994886	0.000160655
3074.4	0.805182	0.993742	0.00203936		3023.1	0.802529	0.994386	0.000576984		5478.23	0.880447	0.957599	0.0131684		5357.31	0.878005	0.992116	0.0013707		2081.36	0.736706	0.994866	0.000286985
3070.74	0.804223	0.993678	0.00209331		3019.44	0.801557	0.994231	0.000831666		5474.56	0.879859	0.955246	0.0175311		5353.64	0.877404	0.992415	0.00111744		2077.7	0.735408	0.994785	7.01099e-05
3067.07	0.803263	0.994038	0.00159333		3015.77	0.800584	0.99376	0.0010262		5470.9	0.87927	0.957844	0.0157289		5349.98	0.876803	0.991897	0.00071139		2074.03	0.734112	0.994947	6.07281e-05
3063.41	0.802303	0.994355	0.000763231		3012.11	0.799611	0.993406	0.00127062		5467.23	0.878681	0.957199	0.0168872		5346.31	0.876202	0.991739	0.000706609		2070.37	0.732815	0.994927	0.000345331
3059.75	0.801344	0.994487	0.000586809		3008.44	0.798638	0.993166	0.00155972		5463.57	0.878092	0.957183	0.0189756		5342.65	0.875601	0.991864	0.000678636		2066.7	0.731517	0.994846	0.000286941
3056.08	0.800384	0.994031	0.00138051		3004.78	0.797665	0.99274	0.00292466		5459.9	0.877503	0.957595	0.0187429		5338.98	0.875	0.99151	0.000754562		2063.04	0.730221	0.994927	0.000523605
3052.42	0.799424	0.993654	0.00143165		3001.12	0.796693	0.992832	0.0029623		5456.24	0.876914	0.958516	0.018202		5335.32	0.874399	0.991564	0.00116437		2059.37	0.728923	0.995068	0.000160697
3048.75	0.798465	0.993399	0.00168239		2997.45	0.79572	0.992549	0.00261126		5452.58	0.876325	0.958499	0.0199467		5331.65	0.873798	0.991068	0.00120703		2055.71	0.727626	0.994805	0.000195176
3045.09	0.797505	0.993655	0.00186795		2993.79	0.794747	0.992362	0.00285862		5448.91	0.875736	0.96034	0.0197309		5327.99	0.873197	0.991509	0.00136676		2052.05	0.72633	0.994785	0.000229861
3041.42	0.796545	0.993831	0.00145712		2990.12	0.793774	0.992382	0.00282506		5445.25	0.875147	0.95933	0.0200973		5324.32	0.872596	0.9914	0.00119369		2048.38	0.725032	0.994765	0.000218909
3037.76	0.795585	0.994373	0.000892687		2986.46	0.792802	0.992511	0.00254113		5441.58	0.874558	0.961352	0.0172696		5320.66	0.871995	0.991306	0.00104039		2044.72	0.723735	0.994947	0.000160665
3034.09	0.794626	0.99434	0.00100224		2982.79	0.791829	0.99252	0.00289588		5437.92	0.873969	0.963031	0.0159743		5317	0.871394	0.991356	0.00125363		2041.05	0.722438	0.994906	0.000229889
3030.43	0.793666	0.994642	0.000909102		2979.13	0.790856	0.992876	0.00248076		5434.26	0.87338	0.960707	0.0177689		5313.33	0.870793	0.991226	0.00130273		2037.39	0.721141	0.995028	0.000185537
3026.77	0.792706	0.994479	0.000521131		2975.46	0.789883	0.992777	0.00227141		5430.59	0.872792	0.960427	0.0184479		5309.67	0.870192	0.991619	0.00105053		2033.72	0.719844	0.994866	0.000195188
3023.1	0.791747	0.994386	0.000576984		2971.8	0.788911	0.992659	0.00245024		5426.93	0.872203	0.9591	0.0189936		5306	0.869591	0.99119	0.00162088		2030.06	0.718547	0.994744	0.000245362
3019.44	0.790787	0.994231	0.000831666		2968.14	0.787938	0.992641	0.00279042		5423.26	0.871614	0.960512	0.0180318		5302.34	0.86899	0.991034	0.00181919		2026.39	0.71725	0.99468	0.000339764
3015.77	0.789827	0.99376	0.0010262		2964.47	0.786965	0.992129	0.00262998		5419.6	0.871025	0.960688	0.0176135		5298.68	0.868389	0.990643	0.00282075		2022.73	0.715953	0.994636	0.000493878
3012.11	0.788868	0.993406	0.00127062		2960.81	0.785992	0.992555	0.00251159		5415.93	0.870436	0.959245	0.0191218		5295.01	0.867788	0.990529	0.00338813		2019.06	0.714656	0.994556	0.000313861
3008.44	0.787908	0.993166	0.00155972		2957.14	0.785019	0.993409	0.00219728		5412.27	0.869847	0.958687	0.0196422		5291.35	0.867188	0.990624	0.00252977		2015.4	0.713359	0.994662	0.000288948
3004.78	0.786948	0.99274	0.00292466		2953.48	0.784047	0.993736	0.00220786		5408.6	0.869258	0.960065	0.0183213		5287.68	0.866586	0.991025	0.00199654		2011.74	0.712062	0.994773	0.000288666
3001.12	0.785989	0.992832	0.0029623		2949.82	0.783074	0.993656	0.00213088		5404.94	0.868669	0.957058	0.0207904		5284.02	0.865986	0.991401	0.00142993		2008.07	0.710765	0.994825	0.000278245
2997.45	0.785029	0.992549	0.00261126		2946.15	0.782101	0.993432	0.00215809		5401.28	0.86808	0.958289	0.0202681		5280.35	0.865384	0.991426	0.00131035		2004.41	0.709468	0.994866	9.27548e-05
2993.79	0.784069	0.992362	0.00285862		2942.49	0.781128	0.992931	0.00212092		5397.61	0.867491	0.957967	0.0205746		5276.69	0.864784	0.99164	0.0012512		2000.74	0.708171	0.994765	0.000278228
2990.12	0.78311	0.992382	0.00282506		2938.82	0.780156	0.992234	0.00244778		5393.95	0.866902	0.957175	0.0207792		5273.02	0.864183	0.991826	0.00116184		1997.08	0.706874	0.994886	0.000182173
2986.46	0.78215	0.992511	0.00254113		2935.16	0.779183	0.992555	0.00226553		5390.28	0.866313	0.956129	0.0213728		5269.36	0.863582	0.991854	0.000786695		1993.41	0.705577	0.994967	0.000229903
2982.79	0.78119	0.99252	0.00289588		2931.49	0.77821	0.992529	0.00212699		5386.62	0.865724	0.957773	0.0207564		5265.69	0.862981	0.991624	0.00199844		1989.75	0.70428	0.994866	0.000311589
2979.13	0.780231	0.992876	0.00248076		2927.83	0.777237	0.992807	0.00181695		5382.95	0.865135	0.962437	0.016985		5262.03	0.86238	0.991339	0.00197333		1986.09	0.702983	0.994765	0.000104565
2975.46	0.779271	0.992777	0.00227141		2924.16	0.776265	0.992933	0.00242309		5379.29	0.864546	0.95976	0.0211202		5258.37	0.861779	0.991238	0.00185445		1982.42	0.701686	0.994595	0.000224805
2971.8	0.778311	0.992659	0.00245024		2920.5	0.775292	0.993445	0.00233873		5375.62	0.863958	0.960647	0.0194586		5254.7	0.861178	0.991196	0.00183401		1978.76	0.700389	0.994553	0.000258076
2968.14	0.777351	0.992641	0.00279042		2916.84	0.774319	0.993306	0.00257929		5371.96	0.863369	0.961952	0.0191348		5251.04	0.860577	0.991333	0.00111882		1975.09	0.699092	0.994684	0.000311532
2964.47	0.776392	0.992129	0.00262998		2913.17	0.773346	0.993409	0.00261043		5368.3	0.86278	0.961155	0.0194564		5247.37	0.859976	0.991363	0.00165605		1971.43	0.697795	0.994846	9.27556e-05
2960.81	0.775432	0.992555	0.00251159		2909.51	0.772374	0.99357	0.00249218		5364.63	0.862191	0.961375	0.0193669		5243.71	0.859375	0.991652	0.00139887		1967.76	0.696498	0.994825	0.000278245
2957.14	0.774472	0.993409	0.00219728		2905.84	0.771401	0.993411	0.00208464		5360.97	0.861602	0.962264	0.0204284		5240.05	0.858774	0.991295	0.00109336		1964.1	0.695201	0.994947	0.000379278
2953.48	0.773513	0.993736	0.00220786		2902.18	0.770428	0.993234	0.00147132		5357.3	0.861013	0.962163	0.0190604		5236.38	0.858173	0.990901	0.000867475		1960.44	0.693904	0.994744	0.000195164
2949.82	0.772553	0.993656	0.00213088		2898.51	0.769455	0.993071	0.00149053		5353.64	0.860424	0.961105	0.0186864		5232.72	0.857572	0.991094	0.00111132		1956.77	0.692607	0.994601	0.000348053
2946.15	0.771593	0.993432	0.00215809		2894.85	0.768483	0.993274	0.00136898		5349.98	0.859835	0.961133	0.0182456		5229.05	0.856971	0.9909	0.000821524		1953.11	0.69131	0.994303	0.000603015
2942.49	0.770633	0.992931	0.00212092		2891.18	0.76751	0.9937	0.00110758		5346.31	0.859246	0.962689	0.0173499		5225.39	0.85637	0.990418	0.00117329		1949.44	0.690013	0.994367	0.000906398
2938.82	0.769674	0.992234	0.00244778		2887.52	0.766537	0.994047	0.00129281		5342.65	0.858657	0.961272	0.0178245		5221.72	0.855769	0.989433	0.000782272		1945.78	0.688716	0.994421	0.000859089
2935.16	0.768714	0.992555	0.00226553		2883.86	0.765564	0.99409	0.00122098		5338.98	0.858068	0.962682	0.0160687		5218.06	0.855168	0.988767	0.00107896		1942.11	0.687419	0.994454	0.00065531
2931.49	0.767754	0.992529	0.00212699		2880.19	0.764592	0.99396	0.00160601		5335.32	0.857479	0.964274	0.0138016		5214.39	0.854567	0.98851	0.00166898		1938.45	0.686122	0.994536	0.000318652
2927.83	0.766795	0.992807	0.00181695		2876.53	0.763619	0.993905	0.00154125		5331.65	0.85689	0.964399	0.0127828		5210.73	0.853966	0.987968	0.00129221		1934.79	0.684825	0.994622	0.000352958
2924.16	0.765835	0.992933	0.00242309		2872.86	0.762646	0.993633	0.00201201		5327.99	0.856301	0.966044	0.0127172		5207.07	0.853365	0.98886	0.000715172		1931.12	0.683528	0.994801	0.000159944
2920.5	0.764875	0.993445	0.00233873		2869.2	0.761673	0.993524	0.00246713		5324.32	0.855713	0.967632	0.0130155		5203.4	0.852764	0.989221	0.00110621		1927.46	0.682231	0.994739	0.000494855
2916.84	0.763916	0.993306	0.00257929		2865.53	0.7607	0.993142	0.00312588		5320.66	0.855124	0.970505	0.011517		5199.74	0.852163	0.989956	0.00113549		1923.79	0.680934	0.994672	0.000133771
2913.17	0.762956	0.993409	0.00261043		2861.87	0.759728	0.993008	0.00330664		5316.99	0.854535	0.971474	0.0135978		5196.07	0.851562	0.990915	0.00137247		1920.13	0.679637	0.99469	2.42488e-05
2909.51	0.761996	0.99357	0.00249218		2858.21	0.758755	0.99294	0.00358213		5313.33	0.853946	0.972648	0.0160235		5192.41	0.850962	0.990805	0.00264117		1916.46	0.67834	0.994696	0.000112565
2905.84	0.761036	0.993411	0.00208464		2854.54	0.757782	0.993303	0.00317277		5309.67	0.853357	0.972439	0.01702		5188.74	0.85036	0.990753	0.0032559		1912.8	0.677043	0.994676	0.000258079
2902.18	0.760077	0.993234	0.00147132		2850.88	0.756809	0.993614	0.00209893		5306	0.852768	0.972816	0.014945		5185.08	0.84976	0.990981	0.00379322		1909.13	0.675746	0.994791	0.000307082
2898.51	0.759117	0.993071	0.00149053		2847.21	0.755837	0.993612	0.00200098		5302.34	0.852179	0.971565	0.0181771		5181.41	0.849159	0.991082	0.00341191		1905.47	0.674449	0.994744	0.000311551
2894.85	0.758157	0.993274	0.00136898		2843.55	0.754864	0.994046	0.00183629		5298.67	0.85159	0.970197	0.0177798		5177.75	0.848558	0.991252	0.00261349		1901.81	0.673152	0.994704	0.000278211
2891.18	0.757198	0.9937	0.00110758		2839.88	0.753891	0.993811	0.00170483		5295.01	0.851001	0.968773	0.0182776		5174.09	0.847957	0.991184	0.00268214		1898.14	0.671855	0.994947	0.000121456
2887.52	0.756238	0.994047	0.00129281		2836.22	0.752918	0.993751	0.00180809		5291.35	0.850412	0.96683	0.017223		5170.42	0.847356	0.991044	0.00217655		1894.48	0.670558	0.994846	0.000286941
2883.86	0.755278	0.99409	0.00122098		2832.55	0.751946	0.993687	0.00197094		5287.68	0.849823	0.963874	0.0187592		5166.76	0.846755	0.990845	0.00275642		1890.81	0.669261	0.994927	0.000213262
2880.19	0.754319	0.99396	0.00160601		2828.89	0.750973	0.993719	0.00186597		5284.02	0.849234	0.961067	0.0187348		5163.09	0.846154	0.990135	0.00254046		1887.15	0.667964	0.994765	0.000278228
2876.53	0.753359	0.993905	0.00154125		2825.23	0.75	0.993753	0.00180589		5280.35	0.848645	0.957795	0.022012		5159.43	0.845553	0.989953	0.00263175		1883.48	0.666667	0.994792	0.000113871
2872.86	0.752399	0.993633	0.00201201		2821.56	0.749027	0.993542	0.00222288		5276.69	0.848056	0.956217	0.0244935		5155.76	0.844952	0.989612	0.00251768		1879.82	0.66537	0.994544	0.000342477
2869.2	0.75144	0.993524	0.00246713		2817.9	0.748054	0.993671	0.00205219		5273.02	0.847468	0.957553	0.0244082		5152.1	0.844351	0.989442	0.00227742		1876.15	0.664073	0.994599	0.00027949
2865.53	0.75048	0.993142	0.00312588		2814.23	0.747082	0.99371	0.00193353		5269.36	0.846879	0.958148	0.0234384		5148.44	0.84375	0.98943	0.00251893		1872.49	0.662776	0.99444	0.00053123
2861.87	0.74952	0.993008	0.00330664		2810.57	0.746109	0.993411	0.00244985		5265.69	0.84629	0.957969	0.0250744		5144.77	0.843149	0.989456	0.00213483		1868.83	0.661478	0.994533	0.000505771
2858.21	0.748561	0.99294	0.00358213		2806.9	0.745136	0.993525	0.00220008		5262.03	0.845701	0.959456	0.0246197		5141.11	0.842548	0.988899	0.00157352		1865.16	0.660182	0.994374	0.000659099
2854.54	0.747601	0.993303	0.00317277		2803.24	0.744163	0.994038	0.00233014		5258.36	0.845112	0.958467	0.0240393		5137.44	0.841947	0.989943	0.00154109		1861.5	0.658885	0.994725	0.000403916
2850.88	0.746641	0.993614	0.00209893		2799.58	0.743191	0.993929	0.00161248		5254.7	0.844523	0.95996	0.0248231		5133.78	0.841346	0.990189	0.00095878		1857.83	0.657587	0.994715	0.000246469
2847.21	0.745681	0.993612	0.00200098		2795.91	0.742218	0.994155	0.00127964		5251.04	0.843934	0.960096	0.023575		5130.11	0.840745	0.990801	0.000687852		1854.17	0.656291	0.994582	0.000474971
2843.55	0.744722	0.994046	0.00183629		2792.25	0.741245	0.994223	0.00115042		5247.37	0.843345	0.960249	0.0217211		5126.45	0.840144	0.990957	0.000760316		1850.5	0.654994	0.994482	0.000344448
2839.88	0.743762	0.993811	0.00170483		2788.58	0.740273	0.994245	0.000901269		5243.71	0.842756	0.962192	0.0205538		5122.78	0.839543	0.99069	0.00180792		1846.84	0.653696	0.994367	0.000687716
2836.22	0.742802	0.993751	0.00180809		2784.92	0.7393	0.994241	0.00101281		5240.04	0.842167	0.96131	0.0215855		5119.12	0.838942	0.990927	0.00129344		1843.18	0.652399	0.994529	0.00081049
2832.55	0.741843	0.993687	0.00197094		2781.25	0.738327	0.994287	0.000722088		5236.38	0.841578	0.961992	0.0224536		5115.46	0.838341	0.991726	0.000655605		1839.51	0.651103	0.994262	0.000888853
2828.89	0.740883	0.993719	0.00186597		2777.59	0.737354	0.994477	0.000732258		5232.72	0.840989	0.962333	0.0205003		5111.79	0.83774	0.991827	8.81583e-05		1835.85	0.649805	0.994267	0.000735145
2825.23	0.739923	0.993753	0.00180589		2773.92	0.736381	0.994651	0.000483801		5229.05	0.8404	0.960552	0.0224987		5108.13	0.837139	0.992454	0.000592195		1832.18	0.648508	0.994351	0.000566589
2821.56	0.738964	0.993542	0.00222288		2770.26	0.735409	0.994576	0.000486295		5225.39	0.839811	0.961634	0.0211248		5104.46	0.836538	0.992005	0.000823815		1828.52	0.647211	0.994447	0.000554025
2817.9	0.738004	0.993671	0.00205219		2766.6	0.734436	0.994288	0.000932906		5221.72	0.839223	0.962263	0.0225954		5100.8	0.835937	0.991871	0.000960347		1824.85	0.645914	0.99456	0.000417767
2814.23	0.737044	0.99371	0.00193353		2762.93	0.733463	0.99407	0.00125652		5218.06	0.838634	0.959596	0.0226365		5097.13	0.835336	0.991862	0.00126628		1821.19	0.644617	0.994497	0.000677227
2810.57	0.736085	0.993411	0.00244985		2759.27	0.73249	0.994069	0.00110196		5214.39	0.838045	0.963211	0.0205763		5093.47	0.834736	0.991829	0.00223086		1817.52	0.64332	0.994561	0.000565502
2806.9	0.735125	0.993525	0.00220008		2755.6	0.731517	0.994217	0.00127646		5210.73	0.837456	0.960638	0.0208807		5089.81	0.834135	0.99186	0.00196491		1813.86	0.642023	0.994605	0.000618801
2803.24	0.734165	0.994038	0.00233014		2751.94	0.730545	0.994462	0.000952139		5207.06	0.836867	0.962482	0.0185354		5086.14	0.833534	0.991381	0.00174938		1810.2	0.640726	0.994454	0.000552227
2799.58	0.733206	0.993929	0.00161248		2748.27	0.729572	0.99459	0.000827575		5203.4	0.836278	0.963131	0.0187559		5082.48	0.832933	0.991616	0.00174296		1806.53	0.639429	0.994532	0.000504897
2795.91	0.732246	0.994155	0.00127964		2744.61	0.728599	0.994561	0.000615632		5199.73	0.835689	0.964193	0.0178313		5078.81	0.832332	0.991441	0.00215534		1802.87	0.638132	0.994468	0.000474944
2792.25	0.731286	0.994223	0.00115042		2740.95	0.727627	0.994652	0.000274634		5196.07	0.8351	0.963153	0.0185502		5075.15	0.831731	0.991146	0.00231053		1799.2	0.636835	0.99465	0.000269505
2788.58	0.730326	0.994245	0.000901269		2737.28	0.726654	0.994594	0.000349949		5192.41	0.834511	0.961724	0.0184197		5071.48	0.83113	0.9911	0.00229608		1795.54	0.635538	0.994745	0.000298217
2784.92	0.729367	0.994241	0.00101281		2733.62	0.725681	0.994881	0.000128857		5188.74	0.833922	0.960044	0.0210852		5067.82	0.830529	0.990452	0.00345738		1791.87	0.634241	0.994678	0.000204769
2781.25	0.728407	0.994287	0.000722088		2729.95	0.724708	0.994625	0.00036741		5185.08	0.833333	0.959427	0.0201329		5064.15	0.829928	0.98963	0.00354726		1788.21	0.632944	0.994572	0.000386958
2777.59	0.727447	0.994477	0.000732258		2726.29	0.723735	0.994572	0.000443491		5181.41	0.832744	0.958433	0.0205335		5060.49	0.829327	0.988924	0.00453491		1784.55	0.631647	0.994675	0.00052449
2773.92	0.726488	0.994651	0.000483801		2722.62	0.722763	0.994351	0.000982867		5177.75	0.832155	0.956541	0.0215292		5056.83	0.828726	0.988196	0.005946		1780.88	0.63035	0.994731	8.45194e-05
2770.26	0.725528	0.994576	0.000486295		2718.96	0.72179	0.99405	0.00139607		5174.09	0.831567	0.955263	0.0219846		5053.16	0.828125	0.987833	0.00585372		1777.22	0.629053	0.99475	0.00011995
2766.6	0.724568	0.994288	0.000932906		2715.29	0.720817	0.993809	0.00172136		5170.42	0.830978	0.955771	0.0211099		5049.5	0.827524	0.987635	0.00587841		1773.55	0.627756	0.994767	0.000212185
2762.93	0.723609	0.99407	0.00125652		2711.63	0.719844	0.993931	0.00160882		5166.76	0.830389	0.95983	0.0183066		5045.83	0.826923	0.987631	0.00572141		1769.89	0.626459	0.99481	9.4599e-05
2759.27	0.722649	0.994069	0.00110196		2707.97	0.718872	0.993885	0.00152485		5163.09	0.8298	0.959605	0.0181968		5042.17	0.826322	0.987099	0.00609084		1766.22	0.625162	0.994633	0.000271988
2755.6	0.721689	0.994217	0.00127646		2704.3	0.717899	0.993882	0.00184796		5159.43	0.829211	0.961002	0.0173715		5038.51	0.825721	0.986776	0.0063335		1762.56	0.623865	0.994535	0.000594894
2751.94	0.720729	0.994462	0.000952139		2700.64	0.716926	0.993896	0.00182046		5155.76	0.828622	0.964879	0.0157088		5034.84	0.82512	0.987882	0.00555287		1758.89	0.622568	0.994456	0.000724396
2748.27	0.71977	0.99459	0.000827575		2696.97	0.715953	0.993559	0.0021412		5152.1	0.828033	0.964007	0.0173758		5031.18	0.824519	0.988152	0.00647789		1755.23	0.621271	0.994047	0.000944533
2744.61	0.71881	0.994561	0.000615632		2693.31	0.714981	0.993728	0.00195415		5148.43	0.827444	0.962964	0.0183246		5027.51	0.823918	0.988933	0.00557635		1751.57	0.619974	0.994282	0.00094845
2740.95	0.71785	0.994652	0.000274634		2689.64	0.714008	0.993659	0.00191468		5144.77	0.826855	0.964446	0.0175152		5023.85	0.823317	0.98872	0.00589637		1747.9	0.618677	0.994157	0.00101113
2737.28	0.716891	0.994594	0.000349949		2685.98	0.713035	0.99424	0.00101315		5141.11	0.826266	0.963236	0.0194219		5020.18	0.822716	0.989268	0.00671461		1744.24	0.61738	0.994425	0.000542764
2733.62	0.715931	0.994881	0.000128857		2682.32	0.712062	0.994344	0.000730494		5137.44	0.825677	0.965971	0.0170591		5016.52	0.822115	0.989185	0.00704022		1740.57	0.616083	0.994364	0.00101333
2729.95	0.714971	0.994625	0.00036741		2678.65	0.71109	0.994588	0.000621752		5133.78	0.825088	0.96515	0.016967		5012.85	0.821514	0.989727	0.00661896		1736.91	0.614786	0.994343	0.000784225
2726.29	0.714012	0.994572	0.000443491		2674.99	0.710117	0.994575	0.000702017		5130.11	0.824499	0.96499	0.017314		5009.19	0.820913	0.989182	0.00695908		1733.25	0.613489	0.99464	0.000763614
2722.62	0.713052	0.994351	0.000982867		2671.32	0.709144	0.994434	0.00124134		5126.45	0.82391	0.965338	0.0166334		5005.52	0.820312	0.989084	0.00713226		1729.58	0.612192	0.994318	0.000931296
2718.96	0.712092	0.99405	0.00139607		2667.66	0.708171	0.993991	0.00128752		5122.78	0.823322	0.967053	0.0167154		5001.86	0.819712	0.989285	0.00695428		1725.92	0.610895	0.99401	0.00128374
2715.29	0.711132	0.993809	0.00172136		2663.99	0.707198	0.994275	0.000955466		5119.12	0.822733	0.964219	0.0160737		4998.2	0.81911	0.989182	0.00682845		1722.25	0.609598	0.993704	0.00179663
2711.63	0.710173	0.993931	0.00160882		2660.33	0.706226	0.994743	0.000762254		5115.45	0.822144	0.963111	0.0186238		4994.53	0.81851	0.988512	0.00774441		1718.59	0.608301	0.993495	0.00225736
2707.97	0.709213	0.993885	0.00152485		2656.66	0.705253	0.994554	0.000474141		5111.79	0.821555	0.960309	0.0185212		4990.87	0.817909	0.989467	0.00706999		1714.92	0.607004	0.993273	0.00243112
2704.3	0.708253	0.993882	0.00184796		2653	0.70428	0.99432	0.000928243		5108.13	0.820966	0.960993	0.0179519		4987.2	0.817308	0.989443	0.00652065		1711.26	0.605707	0.993193	0.00236315
2700.64	0.707294	0.993896	0.00182046		2649.34	0.703308	0.994392	0.000849091		5104.46	0.820377	0.961002	0.0180579		4983.54	0.816707	0.990782	0.00449526		1707.59	0.60441	0.993383	0.0022398
2696.97	0.706334	0.993559	0.0021412		2645.67	0.702335	0.993941	0.00130928		5100.8	0.819788	0.961605	0.0175155		4979.88	0.816106	0.991789	0.00255554		1703.93	0.603113	0.993451	0.00227638
2693.31	0.705374	0.993728	0.00195415		2642.01	0.701362	0.993887	0.00146946		5097.13	0.819199	0.961995	0.0169216		4976.21	0.815505	0.991137	0.00305995		1700.27	0.601816	0.993547	0.00242521
2689.64	0.704415	0.993659	0.00191468		2638.34	0.700389	0.99415	0.000964011		5093.47	0.81861	0.965039	0.0156018		4972.55	0.814904	0.990458	0.00439557		1696.6	0.600519	0.993526	0.00230813
2685.98	0.703455	0.99424	0.00101315		2634.68	0.699416	0.994683	0.000803184		5089.81	0.818021	0.962791	0.0172473		4968.88	0.814303	0.98975	0.00595445		1692.94	0.599222	0.99328	0.00257288
2682.32	0.702495	0.994344	0.000730494		2631.01	0.698444	0.994452	0.000428512		5086.14	0.817432	0.962425	0.0165046		4965.22	0.813702	0.990226	0.00562349		1689.27	0.597925	0.993487	0.00290863
2678.65	0.701536	0.994588	0.000621752		2627.35	0.697471	0.994633	0.000615118		5082.48	0.816843	0.962011	0.0166486		4961.55	0.813101	0.990947	0.00453326		1685.61	0.596628	0.993273	0.00284659
2674.99	0.700576	0.994575	0.000702017		2623.69	0.696498	0.994706	0.000157935		5078.81	0.816254	0.961194	0.0175826		4957.89	0.8125	0.991055	0.0041538		1681.94	0.595331	0.993218	0.00267927
2671.32	0.699616	0.994434	0.00124134		2620.02	0.695525	0.994947	0.000121456		5075.15	0.815665	0.959414	0.0188904		4954.22	0.811899	0.991024	0.00348782		1678.28	0.594034	0.993469	0.002202
2667.66	0.698656	0.993991	0.00128752		2616.36	0.694552	0.99521	0.000350742		5071.48	0.815077	0.961153	0.0164952		4950.56	0.811298	0.991017	0.00293743		1674.62	0.592737	0.993302	0.00253404
2663.99	0.697697	0.994275	0.000955466		2612.69	0.69358	0.994859	0.000367181		5067.82	0.814488	0.962397	0.0164015		4946.9	0.810697	0.990993	0.002948		1670.95	0.59144	0.993498	0.00250962
2660.33	0.696737	0.994743	0.000762254		2609.03	0.692607	0.994357	0.00107479		5064.15	0.813899	0.960877	0.0180953		4943.23	0.810096	0.990771	0.0025394		1667.29	0.590143	0.993433	0.00226458
2656.66	0.695777	0.994554	0.000474141		2605.36	0.691634	0.994079	0.00145006		5060.49	0.81331	0.961038	0.019255		4939.57	0.809495	0.990816	0.00229903		1663.62	0.588846	0.993587	0.00230369
2653	0.694818	0.99432	0.000928243		2601.7	0.690662	0.993972	0.00186563		5056.82	0.812721	0.960979	0.0193539		4935.9	0.808894	0.990225	0.00254947		1659.96	0.587549	0.993868	0.00145225
2649.34	0.693858	0.994392	0.000849091		2598.04	0.689689	0.994117	0.00143918		5053.16	0.812132	0.962738	0.0161977		4932.24	0.808293	0.990477	0.00170447		1656.29	0.586252	0.993482	0.00207467
2645.67	0.692898	0.993941	0.00130928		2594.37	0.688716	0.994062	0.00137434		5049.5	0.811543	0.963886	0.0163811		4928.57	0.807692	0.989264	0.00299885		1652.63	0.584955	0.993686	0.00186908
2642.01	0.691939	0.993887	0.00146946		2590.71	0.687743	0.994014	0.0014058		5045.83	0.810954	0.965905	0.0133617		4924.91	0.807091	0.989237	0.00291492		1648.96	0.583657	0.993708	0.00183055
2638.34	0.690979	0.99415	0.000964011		2587.04	0.68677	0.993778	0.00171291		5042.17	0.810365	0.963554	0.0157543		4921.24	0.80649	0.989888	0.00229825		1645.3	0.58236	0.993683	0.00188176
2634.68	0.690019	0.994683	0.000803184		2583.38	0.685798	0.993949	0.001729		5038.5	0.809776	0.96525	0.0148532		4917.58	0.805889	0.989515	0.00226271		1641.64	0.581064	0.993561	0.00208568
2631.01	0.68906	0.994452	0.000428512		2579.71	0.684825	0.994062	0.00127366		5034.84	0.809187	0.966301	0.0150964		4913.92	0.805288	0.989005	0.00273156		1637.97	0.579766	0.993803	0.00187918
2627.35	0.6881	0.994633	0.000615118		2576.05	0.683852	0.994136	0.00124657		5031.18	0.808598	0.965229	0.0161937		4910.25	0.804687	0.989515	0.00217282		1634.31	0.578469	0.993966	0.00155554
2623.69	0.68714	0.994706	0.000157935		2572.38	0.682879	0.994193	0.00104262		5027.51	0.808009	0.965219	0.0171187		4906.59	0.804086	0.989887	0.0010653		1630.64	0.577173	0.99397	0.00133267
2620.02	0.686181	0.994947	0.000121456		2568.72	0.681907	0.994366	0.000849184		5023.85	0.80742	0.965057	0.017208		4902.92	0.803486	0.989688	0.000892639		1626.98	0.575875	0.994107	0.00141016
2616.36	0.685221	0.99521	0.000350742		2565.06	0.680934	0.994271	0.00106588		5020.18	0.806832	0.9661	0.0157246		4899.26	0.802885	0.990238	0.00081681		1623.31	0.574578	0.993839	0.00160715
2612.69	0.684261	0.994859	0.000367181		2561.39	0.679961	0.99423	0.0011895		5016.52	0.806243	0.967059	0.0147303		4895.59	0.802284	0.990554	0.001081		1619.65	0.573282	0.993766	0.00173947
2609.03	0.683302	0.994357	0.00107479		2557.73	0.678988	0.99431	0.00105142		5012.85	0.805654	0.966874	0.0145339		4891.93	0.801683	0.990741	0.000966904		1615.98	0.571984	0.993841	0.00130716
2605.36	0.682342	0.994079	0.00145006		2554.06	0.678016	0.994289	0.000929028		5009.19	0.805065	0.967272	0.0139771		4888.27	0.801082	0.990931	0.00139915		1612.32	0.570687	0.993879	0.00155344
2601.7	0.681382	0.993972	0.00186563		2550.4	0.677043	0.994282	0.0008374		5005.52	0.804476	0.966647	0.0128687		4884.6	0.800481	0.990767	0.000795686		1608.66	0.56939	0.993785	0.00178067
2598.04	0.680422	0.994117	0.00143918		2546.73	0.67607	0.994123	0.00111262		5001.86	0.803887	0.96439	0.0153312		4880.94	0.79988	0.990812	0.000798248		1604.99	0.568093	0.99383	0.00167918
2594.37	0.679463	0.994062	0.00137434		2543.07	0.675097	0.994029	0.00138527		4998.19	0.803298	0.965438	0.0156452		4877.27	0.799279	0.990381	0.000355637		1601.33	0.566796	0.993807	0.00151643
2590.71	0.678503	0.994014	0.0014058		2539.41	0.674125	0.994134	0.00130429		4994.53	0.802709	0.963247	0.0163199		4873.61	0.798678	0.990512	0.000506891		1597.66	0.565499	0.993818	0.00174518
2587.04	0.677543	0.993778	0.00171291		2535.74	0.673152	0.993996	0.00139173		4990.87	0.80212	0.962303	0.0180633		4869.94	0.798077	0.990583	0.000701253		1594	0.564202	0.993783	0.00206929
2583.38	0.676584	0.993949	0.001729		2532.08	0.672179	0.994263	0.00103032		4987.2	0.801531	0.964465	0.0171768		4866.28	0.797476	0.990626	0.00105796		1590.33	0.562905	0.993421	0.00248936
2579.71	0.675624	0.994062	0.00127366		2528.41	0.671206	0.994326	0.00128695		4983.54	0.800942	0.964078	0.0181481		4862.61	0.796875	0.9901	0.000642434		1586.67	0.561608	0.993426	0.0024314
2576.05	0.674664	0.994136	0.00124657		2524.75	0.670233	0.994117	0.00133337		4979.87	0.800353	0.965865	0.0170134		4858.95	0.796274	0.990268	0.000812713		1583.01	0.560311	0.993672	0.00200597
2572.38	0.673704	0.994193	0.00104262		2521.08	0.669261	0.993933	0.00160585		4976.21	0.799764	0.966457	0.0151401		4855.29	0.795673	0.990143	0.00118761		1579.34	0.559014	0.993288	0.00246491
2568.72	0.672745	0.994366	0.000849184		2517.42	0.668288	0.994457	0.00100678		4972.55	0.799175	0.965033	0.0172574		4851.62	0.795072	0.989904	0.00152383		1575.68	0.557717	0.993518	0.002373
2565.06	0.671785	0.994271	0.00106588		2513.75	0.667315	0.994401	0.000632766		4968.88	0.798586	0.966106	0.0165019		4847.96	0.794471	0.989894	0.000969003		1572.01	0.55642	0.993535	0.00213359
2561.39	0.670825	0.99423	0.0011895		2510.09	0.666343	0.994824	0.000371735		4965.22	0.797998	0.966077	0.0156053		4844.29	0.79387	0.989503	0.00151958		1568.35	0.555123	0.993393	0.00248768
2557.73	0.669866	0.99431	0.00105142		2506.43	0.66537	0.994646	0.000363855		4961.55	0.797409	0.964572	0.0158099		4840.63	0.793269	0.989109	0.00191936		1564.68	0.553826	0.993184	0.00289731
2554.06	0.668906	0.994289	0.000929028		2502.76	0.664397	0.99464	0.000216299		4957.89	0.79682	0.963217	0.0173774		4836.96	0.792668	0.988775	0.00211973		1561.02	0.552529	0.993859	0.00212583
2550.4	0.667946	0.994282	0.0008374		2499.1	0.663424	0.994707	0.000373632		4954.22	0.796231	0.963515	0.0180535		4833.3	0.792067	0.988814	0.00269792		1557.35	0.551232	0.994386	0.00103786
2546.73	0.666987	0.994123	0.00111262		2495.43	0.662451	0.994778	8.15217e-05		4950.56	0.795642	0.96375	0.0179258		4829.64	0.791466	0.98941	0.00272874		1553.69	0.549935	0.994499	0.000675894
2543.07	0.666027	0.994029	0.00138527		2491.77	0.661479	0.994437	0.000570777		4946.89	0.795053	0.963175	0.0213658		4825.97	0.790865	0.989836	0.00335746		1550.03	0.548638	0.994526	0.000590374
2539.41	0.665067	0.994134	0.00130429		2488.11	0.660506	0.994466	0.000780451		4943.23	0.794464	0.961091	0.0219558		4822.31	0.790264	0.990029	0.00302214		1546.36	0.547341	0.994711	0.000763889
2535.74	0.664107	0.993996	0.00139173		2484.44	0.659533	0.994343	0.000888091		4939.57	0.793875	0.963387	0.0200135		4818.64	0.789663	0.99048	0.0032688		1542.7	0.546044	0.994813	0.000626366
2532.08	0.663148	0.994263	0.00103032		2480.78	0.65856	0.994575	0.000751642		4935.9	0.793286	0.965363	0.0180205		4814.98	0.789062	0.990584	0.00243805		1539.03	0.544747	0.994728	0.00018672
2528.41	0.662188	0.994326	0.00128695		2477.11	0.657587	0.993999	0.00132753		4932.24	0.792697	0.962265	0.0202542		4811.31	0.788462	0.990507	0.00274957		1535.37	0.54345	0.994588	0.000211739
2524.75	0.661228	0.994117	0.00133337		2473.45	0.656615	0.99427	0.000963475		4928.57	0.792108	0.962148	0.0210127		4807.65	0.787861	0.991824	0.00238764		1531.7	0.542153	0.994699	0.000330191
2521.08	0.660269	0.993933	0.00160585		2469.78	0.655642	0.99426	0.00113782		4924.91	0.791519	0.962655	0.0197571		4803.98	0.78726	0.991819	0.00240838		1528.04	0.540856	0.99488	0.000324995
2517.42	0.659309	0.994457	0.00100678		2466.12	0.654669	0.994144	0.00118105		4921.24	0.790931	0.96302	0.0192736		4800.32	0.786659	0.991727	0.00264421		1524.38	0.539559	0.995149	0.00041349
2513.75	0.658349	0.994401	0.000632766		2462.45	0.653697	0.993911	0.00153358		4917.58	0.790341	0.962171	0.0195555		4796.66	0.786058	0.991068	0.0026362		1520.71	0.538262	0.994765	0.000160636
2510.09	0.65739	0.994824	0.000371735		2458.79	0.652724	0.994019	0.00160753		4913.91	0.789753	0.963285	0.0183132		4792.99	0.785457	0.990938	0.00265348		1517.05	0.536965	0.994846	3.50582e-05
2506.43	0.65643	0.994646	0.000363855		2455.12	0.651751	0.994168	0.00119233		4910.25	0.789164	0.962186	0.0175565		4789.33	0.784856	0.990937	0.00260697		1513.38	0.535668	0.994987	0.000355816
2502.76	0.65547	0.99464	0.000216299		2451.46	0.650778	0.994363	0.000803873		4906.59	0.788575	0.962336	0.0168973		4785.66	0.784255	0.991736	0.0021131		1509.72	0.534371	0.994927	0.0001952
2499.1	0.654511	0.994707	0.000373632		2447.8	0.649806	0.994559	0.000797733		4902.92	0.787986	0.962957	0.0152146		4782	0.783654	0.991815	0.00257214		1506.05	0.533074	0.994923	0.000295871
2495.43	0.653551	0.994778	8.15217e-05		2444.13	0.648833	0.994558	0.000420215		4899.26	0.787397	0.963218	0.0145683		4778.34	0.783053	0.992026	0.00238958		1502.39	0.531777	0.995068	0.000817248
2491.77	0.652591	0.994437	0.000570777		2440.47	0.64786	0.994701	0.000247825		4895.59	0.786808	0.961922	0.0144601		4774.67	0.782452	0.991974	0.0025799		1498.72	0.53048	0.994805	0.000152805
2488.11	0.651632	0.994466	0.000780451		2436.8	0.646887	0.994504	0.000466775		4891.93	0.786219	0.961259	0.0142538		4771.01	0.781851	0.991734	0.00251786		1495.06	0.529183	0.994852	0.00029464
2484.44	0.650672	0.994343	0.000888091		2433.14	0.645914	0.994562	0.000562037		4888.26	0.78563	0.958338	0.0163716		4767.34	0.78125	0.991695	0.00283598		1491.4	0.527886	0.99492	0.000164446
2480.78	0.649712	0.994575	0.000751642		2429.47	0.644942	0.994379	0.000655211		4884.6	0.785041	0.958344	0.0172286		4763.68	0.780649	0.991608	0.0026747		1487.73	0.526589	0.994805	0.00031157
2477.11	0.648752	0.993999	0.00132753		2425.81	0.643969	0.994135	0.000845982		4880.94	0.784452	0.957609	0.0163794		4760.01	0.780048	0.991771	0.00279166		1484.07	0.525292	0.994825	0.000338093
2473.45	0.647793	0.99427	0.000963475		2422.15	0.642996	0.994017	0.000807505		4877.27	0.783863	0.957698	0.0157611		4756.35	0.779447	0.9917	0.00282179		1480.4	0.523995	0.994866	0.000252797
2469.78	0.646833	0.99426	0.00113782		2418.48	0.642024	0.994141	0.00138195		4873.61	0.783274	0.957457	0.0158432		4752.68	0.778846	0.991643	0.00310891		1476.74	0.522698	0.994765	0.000218909
2466.12	0.645873	0.994144	0.00118105		2414.82	0.641051	0.994135	0.00114433		4869.94	0.782686	0.957634	0.0164565		4749.02	0.778245	0.991942	0.00247466		1473.08	0.521401	0.994846	0.000213251
2462.45	0.644914	0.993911	0.00153358		2411.15	0.640078	0.994319	0.000668921		4866.28	0.782097	0.957611	0.0176186		4745.35	0.777644	0.991898	0.00249086		1469.41	0.520104	0.994825	0.000182162
2458.79	0.643954	0.994019	0.00160753		2407.49	0.639105	0.994484	0.000706676		4862.61	0.781508	0.958736	0.0176411		4741.69	0.777043	0.991772	0.00303745		1465.75	0.518807	0.994744	0.000213223
2455.12	0.642994	0.994168	0.00119233		2403.82	0.638132	0.994309	0.00073133		4858.95	0.780919	0.960473	0.0177925		4738.03	0.776442	0.99137	0.00343206		1462.08	0.51751	0.994886	0.000242897
2451.46	0.642035	0.994363	0.000803873		2400.16	0.63716	0.994094	0.000951235		4855.28	0.78033	0.960739	0.0187965		4734.36	0.775841	0.991274	0.0032448		1458.42	0.516213	0.994805	0.000286968
2447.8	0.641075	0.994559	0.000797733		2396.49	0.636187	0.994165	0.000987286		4851.62	0.779741	0.962426	0.0165669		4730.7	0.77524	0.991394	0.00337065		1454.75	0.514916	0.994866	9.27548e-05
2444.13	0.640115	0.994558	0.000420215		2392.83	0.635214	0.994116	0.00138952		4847.96	0.779152	0.962612	0.0168607		4727.03	0.774639	0.991334	0.00403887		1451.09	0.513619	0.994744	0.000311551
2440.47	0.639156	0.994701	0.000247825		2389.17	0.634241	0.994144	0.00118652		4844.29	0.778563	0.963723	0.0165401		4723.37	0.774038	0.991523	0.00348333		1447.42	0.512321	0.994728	0.000246341
2436.8	0.638196	0.994504	0.000466775		2385.5	0.633268	0.994126	0.00116163		4840.63	0.777974	0.964764	0.014576		4719.7	0.773437	0.991207	0.00335975		1443.76	0.511025	0.994855	0.000300341
2433.14	0.637236	0.994562	0.000562037		2381.84	0.632296	0.994037	0.00157731		4836.96	0.777385	0.964098	0.0157627		4716.04	0.772837	0.991651	0.00310208		1440.1	0.509728	0.994714	9.7812e-05
2429.47	0.636277	0.994379	0.000655211		2378.17	0.631323	0.993899	0.00155476		4833.3	0.776796	0.964306	0.0143138		4712.38	0.772236	0.991962	0.00213227		1436.43	0.50843	0.994805	0.00014022
2425.81	0.635317	0.994135	0.000845982		2374.51	0.63035	0.99423	0.00113587		4829.64	0.776207	0.962962	0.0159727		4708.71	0.771635	0.991858	0.0021354		1432.77	0.507134	0.994825	6.07207e-05
2422.15	0.634357	0.994017	0.000807505		2370.84	0.629378	0.994253	0.000833998		4825.97	0.775618	0.961374	0.0182323		4705.05	0.771034	0.99248	0.00194625		1429.1	0.505837	0.994947	0.000182184
2418.48	0.633397	0.994141	0.00138195		2367.18	0.628405	0.994578	0.000692869		4822.31	0.775029	0.963364	0.016316		4701.38	0.770433	0.992792	0.00135154		1425.44	0.504539	0.994846	0.000185503
2414.82	0.632438	0.994135	0.00114433		2363.52	0.627432	0.994633	0.000693262		4818.64	0.77444	0.963164	0.0183777		4697.72	0.769832	0.992806	0.000741875		1421.77	0.503243	0.994846	0.000185503
2411.15	0.631478	0.994319	0.000668921		2359.85	0.626459	0.994744	0.000195661		4814.98	0.773852	0.963657	0.0180007		4694.05	0.769231	0.992187	0.000411107		1418.11	0.501945	0.994643	0.00032122
2407.49	0.630518	0.994484	0.000706676		2356.19	0.625486	0.994454	0.000290965		4811.31	0.773263	0.964201	0.0167243		4690.39	0.76863	0.991679	0.0013266		1414.44	0.500648	0.994825	0.000264656
2403.82	0.629559	0.994309	0.00073133		2352.52	0.624514	0.994526	0.000266637		4807.65	0.772674	0.966652	0.014138		4686.73	0.768029	0.99237	0.000342297		1410.78	0.499352	0.995149	0.000471844
2400.16	0.628599	0.994094	0.000951235		2348.86	0.623541	0.994518	0.000452219		4803.98	0.772085	0.966564	0.0141006		4683.06	0.767428	0.991962	0.000606377		1407.12	0.498054	0.994744	0.000213223
2396.49	0.627639	0.994165	0.000987286		2345.19	0.622568	0.994603	0.000252217		4800.32	0.771496	0.968969	0.0111325		4679.4	0.766827	0.992297	0.000544236		1403.45	0.496757	0.994927	3.50603e-05
2392.83	0.62668	0.994116	0.00138952		2341.53	0.621595	0.994411	0.000414142		4796.65	0.770907	0.968828	0.0104334		4675.73	0.766226	0.991837	0.000842176		1399.79	0.495461	0.994947	0.000518884
2389.17	0.62572	0.994144	0.00118652		2337.87	0.620623	0.994613	0.000337692		4792.99	0.770318	0.969917	0.0094292		4672.07	0.765625	0.991958	0.000917134		1396.12	0.494163	0.994906	0.000213264
2385.5	0.62476	0.994126	0.00116163		2334.2	0.61965	0.994277	0.000672245		4789.33	0.769729	0.969397	0.00829609		4668.4	0.765024	0.991419	0.0011979		1392.46	0.492866	0.994927	0.000185529
2381.84	0.6238	0.994037	0.00157731		2330.54	0.618677	0.994388	0.000663722		4785.66	0.76914	0.969405	0.00839127		4664.74	0.764423	0.991273	0.00162734		1388.79	0.491569	0.995068	0.000264759
2378.17	0.622841	0.993899	0.00155476		2326.87	0.617704	0.994252	0.000751206		4782	0.768551	0.967486	0.00674268		4661.07	0.763822	0.991375	0.00203086		1385.13	0.490272	0.994886	0.000121449
2374.51	0.621881	0.99423	0.00113587		2323.21	0.616732	0.994437	0.000883247		4778.33	0.767962	0.96745	0.00864497		4657.41	0.763221	0.992084	0.00182062		1381.47	0.488975	0.994816	0.000483236
2370.84	0.620921	0.994253	0.000833998		2319.54	0.615759	0.994279	0.00095372		4774.67	0.767373	0.96491	0.00609093		4653.75	0.76262	0.992319	0.00144151		1377.8	0.487678	0.994765	0.000121434
2367.18	0.619962	0.994578	0.000692869		2315.88	0.614786	0.994234	0.000920491		4771.01	0.766784	0.965907	0.00771027		4650.08	0.762019	0.992585	0.00121322		1374.14	0.486381	0.995028	0.000404426
2363.52	0.619002	0.994633	0.000693262		2312.21	0.613813	0.994095	0.00126509		4767.34	0.766195	0.963697	0.00815759		4646.42	0.761418	0.993037	0.000547741		1370.47	0.485084	0.994805	0.000152805
2359.85	0.618042	0.994744	0.000195661		2308.55	0.612841	0.994297	0.00118729		4763.68	0.765607	0.962764	0.00729439		4642.75	0.760817	0.992791	0.000705481		1366.81	0.483787	0.994765	0.000105162
2356.19	0.617083	0.994454	0.000290965		2304.89	0.611868	0.994228	0.00109168		4760.01	0.765018	0.960834	0.00708624		4639.09	0.760216	0.992957	0.000587009		1363.14	0.48249	0.994705	0.000209327
2352.52	0.616123	0.994526	0.000266637		2301.22	0.610895	0.994094	0.00121779		4756.35	0.764429	0.961277	0.00674695		4635.42	0.759615	0.993054	0.000639678		1359.48	0.481193	0.994846	3.50582e-05
2348.86	0.615163	0.994518	0.000452219		2297.56	0.609922	0.994119	0.00117366		4752.68	0.76384	0.959824	0.00882927		4631.76	0.759014	0.99305	0.000747017		1355.82	0.479896	0.995068	0.000642864
2345.19	0.614203	0.994603	0.000252217		2293.89	0.608949	0.993992	0.00123319		4749.02	0.763251	0.959707	0.00858985		4628.1	0.758413	0.992988	0.000833186		1352.15	0.478599	0.994724	0.000245367
2341.53	0.613244	0.994411	0.000414142		2290.23	0.607977	0.99428	0.000840205		4745.35	0.762662	0.958284	0.00926005		4624.43	0.757812	0.993035	0.000655754		1348.49	0.477302	0.994866	0.000245392
2337.87	0.612284	0.994613	0.000337692		2286.56	0.607004	0.994269	0.000966011		4741.69	0.762073	0.960689	0.0106204		4620.77	0.757211	0.993491	0.00084004		1344.82	0.476005	0.994866	0.000126409
2334.2	0.611324	0.994277	0.000672245		2282.9	0.606031	0.994205	0.000816641		4738.02	0.761484	0.960129	0.0110125		4617.1	0.756611	0.99343	0.000528534		1341.16	0.474708	0.994866	0.000126409
2330.54	0.610365	0.994388	0.000663722		2279.24	0.605058	0.99439	0.000806988		4734.36	0.760895	0.95953	0.0121877		4613.44	0.75601	0.99343	0.000915497		1337.49	0.473411	0.994785	7.01099e-05
2326.87	0.609405	0.994252	0.000751206		2275.57	0.604086	0.994758	5.13474e-05		4730.7	0.760306	0.962502	0.00866531		4609.77	0.755409	0.993228	0.000807186		1333.83	0.472114	0.994726	0.000210702
2323.21	0.608445	0.994437	0.000883247		2271.91	0.603113	0.994825	6.07207e-05		4727.03	0.759717	0.959773	0.0109896		4606.11	0.754808	0.993349	0.000403729		1330.16	0.470817	0.994542	0.000649909
2319.54	0.607486	0.994279	0.00095372		2268.24	0.60214	0.99521	0.000574207		4723.37	0.759128	0.959261	0.0115306		4602.44	0.754207	0.993309	0.00055562		1326.5	0.46952	0.994745	0.000454651
2315.88	0.606526	0.994234	0.000920491		2264.58	0.601167	0.994927	7.01227e-05		4719.7	0.758539	0.958896	0.0118037		4598.78	0.753606	0.993092	0.000511805		1322.84	0.468223	0.994716	0.000318943
2312.21	0.605566	0.994095	0.00126509		2260.91	0.600195	0.994886	0.000160668		4716.04	0.75795	0.960028	0.0105665		4595.12	0.753005	0.993283	0.000723303		1319.17	0.466926	0.994542	0.000334301
2308.55	0.604607	0.994297	0.00118729		2257.25	0.599222	0.994987	0.000126424		4712.38	0.757362	0.960084	0.0106462		4591.45	0.752404	0.99312	0.000535356		1315.51	0.465629	0.994406	0.000780145
2304.89	0.603647	0.994228	0.00109168		2253.59	0.598249	0.994906	0.000152825		4708.71	0.756773	0.961064	0.0101147		4587.79	0.751803	0.992944	0.000578902		1311.84	0.464332	0.994423	0.000619978
2301.22	0.602687	0.994094	0.00121779		2249.92	0.597276	0.995109	0.000213301		4705.05	0.756184	0.961303	0.0119611		4584.12	0.751202	0.992993	0.000637161		1308.18	0.463035	0.994785	0.000126392
2297.56	0.601728	0.994119	0.00117366		2246.26	0.596303	0.994785	0.000152806		4701.38	0.755595	0.963627	0.0122478		4580.46	0.750601	0.993383	0.000672782		1304.51	0.461738	0.994906	7.01184e-05
2293.89	0.600768	0.993992	0.00123319		2242.59	0.595331	0.994906	7.01184e-05		4697.72	0.755006	0.963625	0.0132972		4576.79	0.75	0.993329	0.000939936		1300.85	0.460441	0.994785	0.000245382
2290.23	0.599808	0.99428	0.000840205		2238.93	0.594358	0.994785	9.27499e-05		4694.05	0.754417	0.964017	0.0132187		4573.13	0.749399	0.993268	0.000910034		1297.18	0.459144	0.994947	0.000121456
2286.56	0.598848	0.994269	0.000966011		2235.26	0.593385	0.994846	0.000152816		4690.39	0.753828	0.965358	0.0147139		4569.47	0.748798	0.993228	0.000788906		1293.52	0.457847	0.994906	0.000305636
2282.9	0.597889	0.994205	0.000816641		2231.6	0.592413	0.994846	9.27556e-05		4686.72	0.753239	0.963157	0.01538		4565.8	0.748197	0.993289	0.000939869		1289.86	0.45655	0.994967	0.000152834
2279.24	0.596929	0.99439	0.000806988		2227.93	0.59144	0.994846	0.000126399		4683.06	0.75265	0.964824	0.0155129		4562.14	0.747596	0.993262	0.000835066		1286.19	0.455253	0.994684	0.000355708
2275.57	0.595969	0.994758	5.13474e-05		2224.27	0.590467	0.994846	3.50582e-05		4679.4	0.752061	0.965827	0.0134237		4558.47	0.746995	0.993329	0.000667823		1282.53	0.453956	0.994785	7.01099e-05
2271.91	0.59501	0.994825	6.07207e-05		2220.61	0.589494	0.994846	0.000140237		4675.73	0.751472	0.96746	0.0123632		4554.81	0.746394	0.993329	0.000883305		1278.86	0.452659	0.994765	0.000160636
2268.24	0.59405	0.99521	0.000574207		2216.94	0.588521	0.994947	0.000105187		4672.07	0.750883	0.967895	0.0114972		4551.14	0.745793	0.993127	0.000545556		1275.2	0.451362	0.994508	0.000300433
2264.58	0.59309	0.994927	7.01227e-05		2213.28	0.587549	0.995008	0.000264743		4668.4	0.750294	0.969831	0.0111169		4547.48	0.745192	0.99343	0.0008489		1271.53	0.450065	0.994668	0.000190098
2260.91	0.592131	0.994886	0.000160668		2209.61	0.586576	0.994886	6.07244e-05		4664.74	0.749705	0.969911	0.0121422		4543.81	0.744591	0.993268	0.000781774		1267.87	0.448768	0.994673	0.00046032
2257.25	0.591171	0.994987	0.000126424		2205.95	0.585603	0.994805	9.27491e-05		4661.07	0.749117	0.970667	0.012968		4540.15	0.74399	0.993309	0.000735015		1264.21	0.447471	0.994436	0.000676898
2253.59	0.590211	0.994906	0.000152825		2202.28	0.58463	0.994866	0.000126409		4657.41	0.748528	0.969432	0.0148558		4536.49	0.743389	0.993369	0.000666952		1260.54	0.446174	0.994343	0.000971266
2249.92	0.589252	0.995109	0.000213301		2198.62	0.583658	0.994765	6.0717e-05		4653.74	0.747939	0.969907	0.015165		4532.82	0.742788	0.993208	0.000642472		1256.88	0.444877	0.994463	0.000755415
2246.26	0.588292	0.994785	0.000152806		2194.95	0.582685	0.994805	0.000185506		4650.08	0.74735	0.970571	0.0154464		4529.16	0.742187	0.993276	0.000606978		1253.21	0.44358	0.99449	0.000651311
2242.59	0.587332	0.994906	7.01184e-05		2191.29	0.581712	0.994886	0.000121449		4646.42	0.746761	0.96958	0.0168224		4525.49	0.741587	0.992794	0.00125733		1249.55	0.442283	0.994471	0.000581759
2238.93	0.586373	0.994785	9.27499e-05		2187.63	0.580739	0.994927	0.000152824		4642.75	0.746172	0.970461	0.0164762		4521.83	0.740986	0.992583	0.00149116		1245.88	0.440986	0.994797	0.00107897
2235.26	0.585413	0.994846	0.000152816		2183.96	0.579767	0.994886	0.000160655		4639.09	0.745583	0.970603	0.0149869		4518.16	0.740385	0.992729	0.0010024		1242.22	0.439689	0.994218	0.000894126
2231.6	0.584453	0.994846	9.27556e-05		2180.3	0.578794	0.994805	3.5056e-05		4635.42	0.744994	0.971886	0.0142596		4514.5	0.739784	0.993187	0.000666831		1238.56	0.438391	0.994339	0.00146025
2227.93	0.583493	0.994846	0.000126399		2176.63	0.577821	0.994805	3.5056e-05		4631.76	0.744405	0.972305	0.0120941		4510.84	0.739183	0.993228	0.000529608		1234.89	0.437095	0.99354	0.00207363
2224.27	0.582534	0.994846	3.50582e-05		2172.97	0.576848	0.994947	0.000121456		4628.09	0.743816	0.969997	0.0142741		4507.17	0.738582	0.993349	0.000707864		1231.23	0.435798	0.993957	0.00176867
2220.61	0.581574	0.994846	0.000140237		2169.3	0.575876	0.994805	7.01142e-05		4624.43	0.743227	0.972289	0.0111308		4503.51	0.737981	0.993046	0.000747993		1227.56	0.4345	0.993951	0.00135696
2216.94	0.580614	0.994947	0.000105187		2165.64	0.574903	0.994846	0.000126399		4620.77	0.742638	0.973086	0.00944673		4499.84	0.73738	0.993228	0.00115241		1223.9	0.433204	0.994096	0.00126487
2213.28	0.579655	0.995008	0.000264743		2161.98	0.57393	0.994785	7.01099e-05		4617.1	0.742049	0.973588	0.00966741		4496.18	0.736779	0.993389	0.000486313		1220.23	0.431907	0.993973	0.00142603
2209.61	0.578695	0.994886	6.07244e-05		2158.31	0.572957	0.994967	0.000152834		4613.44	0.741461	0.972754	0.0091734		4492.51	0.736178	0.993369	0.000893283		1216.57	0.430609	0.994053	0.00128806
2205.95	0.577735	0.994805	9.27491e-05		2154.65	0.571984	0.994778	2.23159e-05		4609.77	0.740872	0.972472	0.00926674		4488.85	0.735577	0.993263	0.000723251		1212.9	0.429313	0.99442	0.000784432
2202.28	0.576775	0.994866	0.000126409		2150.98	0.571012	0.994512	0.000490935		4606.11	0.740283	0.970972	0.0101512		4485.19	0.734976	0.993368	0.00114084		1209.24	0.428016	0.994637	0.000653144
2198.62	0.575816	0.994765	6.0717e-05		2147.32	0.570039	0.994235	0.000917991		4602.44	0.739694	0.968732	0.00915899		4481.52	0.734375	0.993006	0.000872563		1205.58	0.426718	0.994586	0.000414697
2194.95	0.574856	0.994805	0.000185506		2143.65	0.569066	0.994176	0.00118103		4598.78	0.739105	0.968247	0.00986532		4477.86	0.733774	0.992996	0.000978602		1201.91	0.425422	0.994839	0.000480354
2191.29	0.573896	0.994886	0.000121449		2139.99	0.568093	0.994322	0.00113507		4595.11	0.738516	0.967325	0.0107062		4474.19	0.733173	0.993202	0.00128317		1198.25	0.424124	0.994853	0.000187462
2187.63	0.572937	0.994927	0.000152824		2136.32	0.567121	0.994151	0.00101022		4591.45	0.737927	0.967299	0.0105031		4470.53	0.732572	0.992958	0.000863148		1194.58	0.422827	0.994805	7.01142e-05
2183.96	0.571977	0.994886	0.000160655		2132.66	0.566148	0.994241	0.00106517		4587.79	0.737338	0.967744	0.0112205		4466.86	0.731971	0.993089	0.000440423		1190.92	0.421531	0.994805	3.5056e-05
2180.3	0.571017	0.994805	3.5056e-05		2129	0.565175	0.994221	0.00109942		4584.12	0.736749	0.967812	0.0119601		4463.2	0.73137	0.992781	0.000471565		1187.25	0.420233	0.995008	0.000182195
2176.63	0.570058	0.994805	3.5056e-05		2125.33	0.564202	0.994191	0.00110483		4580.46	0.73616	0.969372	0.00937573		4459.53	0.730769	0.992507	0.000487125		1183.59	0.418936	0.994866	3.50582e-05
2172.97	0.569098	0.994947	0.000121456		2121.67	0.56323	0.994101	0.00104661		4576.79	0.735571	0.970708	0.00982982		4455.87	0.730168	0.992533	0.000787505		1179.93	0.41764	0.994846	0.000140237
2169.3	0.568138	0.994805	7.01142e-05		2118	0.562257	0.994314	0.000783483		4573.13	0.734982	0.969297	0.00914475		4452.21	0.729567	0.992838	0.00034224		1176.26	0.416342	0.994927	0.000126416
2165.64	0.567178	0.994846	0.000126399		2114.34	0.561284	0.994374	0.000905074		4569.47	0.734393	0.969581	0.00872062		4448.54	0.728966	0.993006	0.000629893		1172.6	0.415045	0.994805	9.27491e-05
2161.98	0.566219	0.994785	7.01099e-05		2110.67	0.560311	0.994381	0.00077016		4565.8	0.733804	0.967661	0.0109809		4444.88	0.728365	0.992942	0.000593649		1168.93	0.413748	0.994805	0.000152805
2158.31	0.565259	0.994967	0.000152834		2107.01	0.559338	0.994453	0.00075273		4562.14	0.733216	0.967864	0.0107175		4441.21	0.727764	0.992868	0.000455143		1165.27	0.412451	0.994866	9.27548e-05
2154.65	0.564299	0.994778	2.23159e-05		2103.35	0.558366	0.99433	0.000647882		4558.47	0.732627	0.9665	0.0134271		4437.55	0.727163	0.992497	0.000466073		1161.6	0.411154	0.995352	0.000987962
2150.98	0.56334	0.994512	0.000490935		2099.68	0.557393	0.994677	0.000842523		4554.81	0.732038	0.967296	0.0138002		4433.88	0.726563	0.992058	0.000627149		1157.94	0.409857	0.994866	9.27548e-05
2147.32	0.56238	0.994235	0.000917991		2096.02	0.55642	0.994359	0.000474868		4551.14	0.731449	0.966433	0.0129825		4430.22	0.725961	0.991612	0.00113548		1154.27	0.40856	0.994886	0
2143.65	0.56142	0.994176	0.00118103		2092.35	0.555448	0.994738	0.000130786		4547.48	0.73086	0.966576	0.0132742		4426.56	0.725361	0.991843	0.000461117		1150.61	0.407263	0.994866	0.000126409
2139.99	0.560461	0.994322	0.00113507		2088.69	0.554475	0.994537	0.000502049		4543.81	0.730271	0.965752	0.0133005		4422.89	0.72476	0.991903	0.000685671		1146.95	0.405966	0.994967	0.000185526
2136.32	0.559501	0.994151	0.00101022		2085.02	0.553502	0.994569	0.000704656		4540.15	0.729682	0.966539	0.0125025		4419.23	0.724159	0.991833	0.00145556		1143.28	0.404669	0.994685	0.000309901
2132.66	0.558541	0.994241	0.00106517		2081.36	0.552529	0.994472	0.00061133		4536.48	0.729093	0.965199	0.0143002		4415.56	0.723558	0.991881	0.00188852		1139.62	0.403372	0.994695	0.000541022
2129	0.557582	0.994221	0.00109942		2077.7	0.551557	0.99444	0.000726485		4532.82	0.728504	0.966245	0.0126278		4411.9	0.722957	0.991582	0.00230999		1135.95	0.402075	0.994293	0.00087402
2125.33	0.556622	0.994191	0.00110483		2074.03	0.550584	0.994467	0.000925065		4529.16	0.727915	0.965862	0.0129322		4408.23	0.722356	0.991689	0.00216778		1132.29	0.400778	0.994038	0.0014194
2121.67	0.555662	0.994101	0.00104661		2070.37	0.549611	0.994191	0.000995484		4525.49	0.727326	0.967112	0.0125849		4404.57	0.721755	0.992085	0.0023448		1128.62	0.399481	0.993975	0.00142055
2118	0.554703	0.994314	0.000783483		2066.7	0.548638	0.994098	0.00116032		4521.83	0.726737	0.968994	0.00951395		4400.9	0.721154	0.99182	0.00255151		1124.96	0.398184	0.994178	0.00156024
2114.34	0.553743	0.994374	0.000905074		2063.04	0.547665	0.994343	0.000837372		4518.16	0.726148	0.966495	0.0127198		4397.24	0.720553	0.991774	0.00263411		1121.3	0.396887	0.994101	0.00115072
2110.67	0.552783	0.994381	0.00077016		2059.37	0.546693	0.9946	0.000603348		4514.5	0.725559	0.969356	0.0102499		4393.58	0.719952	0.992304	0.00174316		1117.63	0.39559	0.993985	0.00145661
2107.01	0.551823	0.994453	0.00075273		2055.71	0.54572	0.994616	0.000104311		4510.84	0.724971	0.968588	0.0108539		4389.91	0.719351	0.99277	0.00097229		1113.97	0.394293	0.994187	0.00131693
2103.35	0.550864	0.99433	0.000647882		2052.04	0.544747	0.994668	0.000326739		4507.17	0.724382	0.969453	0.011157		4386.25	0.71875	0.993269	0.00114464		1110.3	0.392996	0.99413	0.00115147
2099.68	0.549904	0.994677	0.000842523		2048.38	0.543774	0.994659	0.000341928		4503.51	0.723793	0.969987	0.00998522		4382.58	0.718149	0.993066	0.000940934		1106.64	0.391699	0.994157	0.00126261
2096.02	0.548944	0.994359	0.000474868		2044.72	0.542802	0.994623	0.000404236		4499.84	0.723204	0.970839	0.0103403		4378.92	0.717548	0.993026	0.000800188		1102.97	0.390402	0.994162	0.000937811
2092.35	0.547985	0.994738	0.000130786		2041.05	0.541829	0.994615	0.000523841		4496.18	0.722615	0.970033	0.00919307		4375.25	0.716947	0.99327	0.00102118		1099.31	0.389105	0.994415	0.000818458
2088.69	0.547025	0.994537	0.000502049		2037.39	0.540856	0.994447	0.000553036		4492.51	0.722026	0.97073	0.00801531		4371.59	0.716346	0.993	0.000624896		1095.64	0.387808	0.994445	0.000765666
2085.02	0.546065	0.994569	0.000704656		2033.72	0.539883	0.994553	0.000531797		4488.85	0.721437	0.971287	0.00854274		4367.93	0.715745	0.992935	0.000834679		1091.98	0.386511	0.994437	0.000731777
2081.36	0.545106	0.994472	0.00061133		2030.06	0.538911	0.994535	0.000556895		4485.18	0.720848	0.971154	0.00771415		4364.26	0.715144	0.993248	0.00106218		1088.32	0.385214	0.994451	0.000702147
2077.7	0.544146	0.99444	0.000726485		2026.39	0.537938	0.994792	0.000813478		4481.52	0.720259	0.972985	0.00829076		4360.6	0.714543	0.99273	0.000554473		1084.65	0.383917	0.994505	0.000786493
2074.03	0.543186	0.994467	0.000925065		2022.73	0.536965	0.994704	0.0006347		4477.85	0.71967	0.971021	0.00952625		4356.93	0.713942	0.993107	0.000748039		1080.99	0.38262	0.994475	0.00050529
2070.37	0.542227	0.994191	0.000995484		2019.07	0.535992	0.994735	0.000471937		4474.19	0.719081	0.971305	0.00981379		4353.27	0.713341	0.99321	0.00109599		1077.32	0.381323	0.994678	0.000374185
2066.7	0.541267	0.994098	0.00116032		2015.4	0.535019	0.994684	0.00035522		4470.53	0.718492	0.972837	0.00792161		4349.6	0.71274	0.99308	0.000382434		1073.66	0.380026	0.994617	0.000360311
2063.04	0.540307	0.994343	0.000837372		2011.74	0.534047	0.99468	0.000361985		4466.86	0.717903	0.974601	0.0071436		4345.94	0.712139	0.992446	0.000751433		1069.99	0.378729	0.994674	0.000420238
2059.37	0.539348	0.9946	0.000603348		2008.07	0.533074	0.994725	0.000184487		4463.2	0.717314	0.972354	0.00841766		4342.27	0.711539	0.992574	0.000533091		1066.33	0.377432	0.994599	0.000341396
2055.71	0.538388	0.994616	0.000104311		2004.41	0.532101	0.994644	0.000337225		4459.53	0.716726	0.972421	0.00988762		4338.61	0.710937	0.993132	0.000742437		1062.67	0.376135	0.994707	0.000213635
2052.04	0.537428	0.994668	0.000326739		2000.74	0.531128	0.994686	0.000450903		4455.87	0.716137	0.972787	0.0106315		4334.95	0.710337	0.993471	0.000980382		1059	0.374838	0.994581	0.000323539
2048.38	0.536468	0.994659	0.000341928		1997.08	0.530156	0.994507	0.000604016		4452.2	0.715548	0.97211	0.012454		4331.28	0.709735	0.993127	0.000855036		1055.34	0.373541	0.994644	0.000276266
2044.72	0.535509	0.994623	0.000404236		1993.41	0.529183	0.99432	0.000779932		4448.54	0.714959	0.971556	0.0124737		4327.62	0.709135	0.99339	0.000814061		1051.67	0.372244	0.994804	0.000373531
2041.05	0.534549	0.994615	0.000523841		1989.75	0.52821	0.994452	0.000804688		4444.88	0.71437	0.970872	0.0122814		4323.95	0.708534	0.99341	0.000928397		1048.01	0.370947	0.994738	0.000205494
2037.39	0.533589	0.994447	0.000553036		1986.09	0.527237	0.994361	0.000663295		4441.21	0.713781	0.971403	0.0116388		4320.29	0.707933	0.993147	0.000781679		1044.34	0.36965	0.994842	0.000257669
2033.72	0.53263	0.994553	0.000531797		1982.42	0.526265	0.994607	0.000536991		4437.55	0.713192	0.973377	0.0111636		4316.62	0.707332	0.993188	0.000952859		1040.68	0.368353	0.994804	3.76748e-05
2030.06	0.53167	0.994535	0.000556895		1978.76	0.525292	0.994612	0.000318536		4433.88	0.712603	0.971644	0.0113106		4312.96	0.706731	0.992985	0.000697209		1037.01	0.367056	0.99485	0.000152106
2026.39	0.53071	0.994792	0.000813478		1975.09	0.524319	0.994504	0.000427072		4430.22	0.712014	0.972036	0.0126451		4309.3	0.70613	0.993107	0.000515526		1033.35	0.365759	0.995104	0.0002329
2022.73	0.529751	0.994704	0.0006347		1971.43	0.523346	0.994525	0.000309717		4426.55	0.711425	0.971095	0.0109557		4305.63	0.705529	0.993309	0.00091555		1029.69	0.364462	0.994904	0.00033474
2019.07	0.528791	0.994735	0.000471937		1967.76	0.522374	0.994594	0.000244887		4422.89	0.710836	0.972331	0.0125748		4301.97	0.704928	0.993167	0.000772189		1026.02	0.363165	0.994779	0.000135465
2015.4	0.527831	0.994684	0.00035522		1964.1	0.521401	0.994636	0.00045061		4419.23	0.710247	0.972529	0.0126553		4298.3	0.704327	0.993066	0.000815337		1022.36	0.361868	0.994972	0.00032519
2011.74	0.526871	0.99468	0.000361985		1960.44	0.520428	0.994559	0.000515647		4415.56	0.709658	0.970443	0.0163027		4294.64	0.703726	0.993208	0.0008833		1018.69	0.360571	0.994724	9.27443e-05
2008.07	0.525912	0.994725	0.000184487		1956.77	0.519455	0.994483	0.000593678		4411.9	0.709069	0.972601	0.0159381		4290.97	0.703125	0.993107	0.00112152		1015.03	0.359274	0.994846	3.50582e-05
2004.41	0.524952	0.994644	0.000337225		1953.11	0.518483	0.994557	0.000717124		4408.23	0.70848	0.974238	0.0126088		4287.31	0.702524	0.993046	0.000807039		1011.37	0.357977	0.994927	0.000126416
2000.74	0.523992	0.994686	0.000450903		1949.44	0.51751	0.994107	0.00130014		4404.57	0.707892	0.975755	0.0114047		4283.65	0.701923	0.993127	0.00100152		1007.7	0.356679	0.99498	3.0874e-05
1997.08	0.523033	0.994507	0.000604016		1945.78	0.516537	0.994532	0.000740451		4400.9	0.707303	0.975065	0.0122648		4279.98	0.701322	0.993208	0.000970557		1004.04	0.355383	0.994745	0.000193462
1993.41	0.522073	0.99432	0.000779932		1942.11	0.515564	0.99439	0.00103976		4397.24	0.706714	0.973949	0.0134897		4276.32	0.700721	0.993148	0.000861628		1000.37	0.354086	0.994961	0.000100309
1989.75	0.521113	0.994452	0.000804688		1938.45	0.514592	0.994227	0.00109919		4393.57	0.706125	0.974941	0.0143912		4272.65	0.70012	0.993187	0.000734925		996.707	0.352788	0.994825	6.07207e-05
1986.09	0.520154	0.994361	0.000663295		1934.78	0.513619	0.994178	0.0011206		4389.91	0.705536	0.974101	0.0131558		4268.99	0.699519	0.993268	0.000947752		993.043	0.351492	0.995008	6.07317e-05
1982.42	0.519194	0.994607	0.000536991		1931.12	0.512646	0.993822	0.00168476		4386.25	0.704947	0.974385	0.0127951		4265.32	0.698918	0.993167	0.000849246		989.379	0.350195	0.994927	0.000175312
1978.76	0.518234	0.994612	0.000318536		1927.46	0.511673	0.993698	0.00190001		4382.58	0.704358	0.974957	0.0099207		4261.66	0.698317	0.993167	0.000767505		985.714	0.348897	0.995008	0.000105194
1975.09	0.517274	0.994504	0.000427072		1923.79	0.5107	0.993887	0.00163613		4378.92	0.703769	0.97549	0.00919912		4257.99	0.697716	0.993289	0.00089359		982.05	0.347601	0.994866	7.01184e-05
1971.43	0.516315	0.994525	0.000309717		1920.13	0.509728	0.993916	0.00152343		4375.25	0.70318	0.975345	0.00901983		4254.33	0.697115	0.993046	0.000851403		978.385	0.346303	0.994805	3.5056e-05
1967.76	0.515355	0.994594	0.000244887		1916.46	0.508755	0.994791	3.13125e-05		4371.59	0.702591	0.975155	0.00775833		4250.67	0.696514	0.992917	0.000818937		974.721	0.345006	0.994866	9.27548e-05
1964.1	0.514395	0.994636	0.00045061		1912.8	0.507782	0.99422	0.00104838		4367.92	0.702002	0.973847	0.00665733		4247	0.695913	0.992599	0.00112917		971.057	0.343709	0.995068	0.000369478
1960.44	0.513436	0.994559	0.000515647		1909.13	0.506809	0.994112	0.00123631		4364.26	0.701413	0.973496	0.00551272		4243.34	0.695313	0.992862	0.000886019		967.392	0.342412	0.994866	9.27548e-05
1956.77	0.512476	0.994483	0.000593678		1905.47	0.505837	0.994228	0.00119675		4360.6	0.700825	0.972546	0.00674695		4239.67	0.694711	0.992886	0.00073618		963.728	0.341115	0.994927	7.01227e-05
1953.11	0.511516	0.994557	0.000717124		1901.81	0.504864	0.994345	0.000897984		4356.93	0.700235	0.973246	0.00706389		4236.01	0.694111	0.99301	0.000857416		960.064	0.339818	0.994927	3.50603e-05
1949.44	0.510557	0.994107	0.00130014		1898.14	0.503891	0.993934	0.00149359		4353.27	0.699647	0.973907	0.00770841		4232.34	0.69351	0.992771	0.000305763		956.399	0.338521	0.994886	6.07244e-05
1945.78	0.509597	0.994532	0.000740451		1894.48	0.502918	0.993889	0.0017439		4349.6	0.699058	0.975456	0.00598288		4228.68	0.692909	0.992398	0.000152703		952.735	0.337224	0.994866	0.000126409
1942.11	0.508637	0.99439	0.00103976		1890.81	0.501946	0.993938	0.00137947		4345.94	0.698469	0.978433	0.00689665		4225.02	0.692308	0.991939	0.00058705		949.071	0.335927	0.994825	6.07207e-05
1938.45	0.507678	0.994227	0.00109919		1887.15	0.500973	0.99418	0.00101493		4342.27	0.69788	0.978768	0.0100305		4221.35	0.691707	0.991436	0.00139398		945.406	0.33463	0.994788	0.000282473
1934.78	0.506718	0.994178	0.0011206		1883.48	0.5	0.994399	0.000853187		4338.61	0.697291	0.979192	0.0112843		4217.69	0.691106	0.991679	0.00115995		941.742	0.333333	0.994618	0.000412086
1931.12	0.505758	0.993822	0.00168476		1879.82	0.499027	0.994799	0.000862892		4334.94	0.696702	0.978761	0.0115996		4214.02	0.690505	0.99188	0.000653303		938.077	0.332036	0.994678	0.000308968
1927.46	0.504799	0.993698	0.00190001		1876.15	0.498054	0.994799	0.000309531		4331.28	0.696113	0.976932	0.0119613		4210.36	0.689904	0.991733	0.00124669		934.413	0.330739	0.994772	0.000197986
1923.79	0.503839	0.993887	0.00163613		1872.49	0.497082	0.994508	0.000609634		4327.62	0.695524	0.974256	0.0119838		4206.69	0.689303	0.992036	0.00160168		930.749	0.329442	0.994866	0.000152814
1920.13	0.502879	0.993916	0.00152343		1868.83	0.496109	0.994602	0.000655493		4323.95	0.694935	0.972017	0.0134076		4203.03	0.688702	0.992012	0.00122403		927.084	0.328145	0.995028	0.000175312
1916.46	0.501919	0.994791	3.13125e-05		1865.16	0.495136	0.994318	0.000826421		4320.29	0.694346	0.970675	0.0149008		4199.36	0.688101	0.992356	0.00113121		923.42	0.326848	0.994846	9.27556e-05
1912.8	0.50096	0.99422	0.00104838		1861.5	0.494163	0.994408	0.000725355		4316.62	0.693757	0.971814	0.0131859		4195.7	0.6875	0.992682	0.00113042		919.756	0.325551	0.994866	7.01184e-05
1909.13	0.5	0.994112	0.00123631		1857.83	0.493191	0.994221	0.000835586		4312.96	0.693168	0.97077	0.0128804		4192.04	0.686899	0.992764	0.000928603		916.091	0.324254	0.994765	6.0717e-05
1905.47	0.49904	0.994228	0.00119675		1854.17	0.492218	0.994221	0.000845592		4309.3	0.69258	0.970826	0.0124841		4188.37	0.686298	0.992429	0.000257377		912.427	0.322957	0.994927	3.50603e-05
1901.81	0.498081	0.994345	0.000897984		1850.5	0.491245	0.994382	0.000767839		4305.63	0.691991	0.972843	0.0111477		4184.71	0.685697	0.992486	0.00038632		908.763	0.32166	0.994866	9.27548e-05
1898.14	0.497121	0.993934	0.00149359		1846.84	0.490272	0.994499	0.000723288		4301.97	0.691402	0.971047	0.0106665		4181.04	0.685096	0.992504	0.000182242		905.098	0.320363	0.994886	0.000160668
1894.48	0.496161	0.993889	0.0017439		1843.18	0.4893	0.99442	0.000977462		4298.3	0.690813	0.970183	0.0132587		4177.38	0.684495	0.99229	0.00023769		901.434	0.319066	0.994927	7.01227e-05
1890.81	0.495202	0.993938	0.00137947		1839.51	0.488327	0.994344	0.00104435		4294.64	0.690224	0.971015	0.0126742		4173.71	0.683894	0.992376	0.000239751		897.769	0.317769	0.994825	6.07207e-05
1887.15	0.494242	0.99418	0.00101493		1835.85	0.487354	0.994077	0.00145428		4290.97	0.689635	0.971964	0.0131739		4170.05	0.683293	0.992515	0.000272828		894.105	0.316472	0.994987	7.0127e-05
1883.48	0.493282	0.994399	0.000853187		1832.18	0.486381	0.994104	0.00124874		4287.31	0.689046	0.971876	0.0136607		4166.39	0.682692	0.99281	0.00059898		890.441	0.315175	0.994927	0.000185529
1879.82	0.492323	0.994799	0.000862892		1828.52	0.485409	0.994114	0.00144822		4283.64	0.688457	0.97332	0.0137321		4162.72	0.682091	0.992837	0.000721071		886.776	0.313878	0.994927	0.000185529
1876.15	0.491363	0.994799	0.000309531		1824.85	0.484436	0.994051	0.00128857		4279.98	0.687868	0.973065	0.014681		4159.06	0.68149	0.992826	0.000471221		883.112	0.312581	0.994866	3.50582e-05
1872.49	0.490403	0.994508	0.000609634		1821.19	0.483463	0.994001	0.0011459		4276.31	0.687279	0.973653	0.0144696		4155.39	0.680889	0.992695	0.00039926		879.448	0.311284	0.994927	3.50603e-05
1868.83	0.489444	0.994602	0.000655493		1817.53	0.48249	0.993959	0.00165181		4272.65	0.68669	0.974797	0.0135195		4151.73	0.680288	0.992682	0.000438501		875.783	0.309987	0.994851	0.000117562
1865.16	0.488484	0.994318	0.000826421		1813.86	0.481517	0.993971	0.00158884		4268.99	0.686101	0.976527	0.0125433		4148.06	0.679687	0.992187	0.00104309		872.119	0.30869	0.994878	0.00010957
1861.5	0.487524	0.994408	0.000725355		1810.2	0.480545	0.993984	0.00156277		4265.32	0.685512	0.976518	0.0127832		4144.4	0.679087	0.991634	0.00204579		868.455	0.307393	0.994843	0.000180172
1857.83	0.486564	0.994221	0.000835586		1806.53	0.479572	0.994097	0.0013172		4261.66	0.684923	0.97839	0.0114201		4140.73	0.678485	0.99118	0.00306578		864.79	0.306096	0.994738	0.000224101
1854.17	0.485605	0.994221	0.000845592		1802.87	0.478599	0.993922	0.00161788		4257.99	0.684334	0.978301	0.0119141		4137.07	0.677885	0.991359	0.00256269		861.126	0.304799	0.99474	7.46695e-05
1850.5	0.484645	0.994382	0.000767839		1799.2	0.477627	0.994174	0.0011849		4254.33	0.683746	0.978822	0.0116589		4133.41	0.677284	0.991921	0.0017379		857.461	0.303502	0.994888	0.000103697
1846.84	0.483685	0.994499	0.000723288		1795.54	0.476654	0.994633	0.000499925		4250.66	0.683157	0.977883	0.0120483		4129.74	0.676683	0.991745	0.00210019		853.797	0.302205	0.994837	0.000204411
1843.18	0.482726	0.99442	0.000977462		1791.88	0.475681	0.994299	0.000806243		4247	0.682568	0.977908	0.0126113		4126.08	0.676082	0.99232	0.00129291		850.133	0.300908	0.994756	0.000170823
1839.51	0.481766	0.994344	0.00104435		1788.21	0.474708	0.99446	0.000740691		4243.34	0.681979	0.977719	0.0127595		4122.41	0.675481	0.992447	0.000914263		846.468	0.299611	0.99478	4.04542e-05
1835.85	0.480806	0.994077	0.00145428		1784.55	0.473735	0.994326	0.000768933		4239.67	0.68139	0.980489	0.0101364		4118.75	0.67488	0.992329	0.000665648		842.804	0.298314	0.99521	0.000460003
1832.18	0.479846	0.994104	0.00124874		1780.88	0.472763	0.99433	0.00106847		4236.01	0.680801	0.979621	0.0106561		4115.08	0.674279	0.992563	0.000543621		839.14	0.297017	0.994927	0.000126416
1828.52	0.478887	0.994114	0.00144822		1777.22	0.47179	0.994004	0.00123224		4232.34	0.680212	0.97856	0.0109549		4111.42	0.673678	0.992927	0.000246976		835.475	0.29572	0.994805	0.000126401
1824.85	0.477927	0.994051	0.00128857		1773.55	0.470817	0.993733	0.00160698		4228.68	0.679623	0.978429	0.0109685		4107.76	0.673077	0.992434	0.000232981		831.811	0.294423	0.994785	3.5056e-05
1821.19	0.476967	0.994001	0.0011459		1769.89	0.469844	0.993672	0.00157618		4225.01	0.679034	0.976731	0.0125051		4104.09	0.672476	0.992318	0.000692266		828.146	0.293126	0.994927	7.01227e-05
1817.53	0.476008	0.993959	0.00165181		1766.22	0.468872	0.993935	0.00149299		4221.35	0.678445	0.975142	0.0145851		4100.43	0.671875	0.992433	0.00126162		824.482	0.291829	0.995251	0.000338237
1813.86	0.475048	0.993971	0.00158884		1762.56	0.467899	0.993999	0.00164212		4217.69	0.677856	0.974013	0.0147251		4096.76	0.671274	0.992128	0.00189339		820.818	0.290532	0.994906	0.000252835
1810.2	0.474088	0.993984	0.00156277		1758.9	0.466926	0.99407	0.00140781		4214.02	0.677267	0.971647	0.0147543		4093.1	0.670673	0.991853	0.00223634		817.153	0.289235	0.994906	9.27612e-05
1806.53	0.473129	0.994097	0.0013172		1755.23	0.465953	0.994338	0.00122101		4210.36	0.676678	0.97261	0.0137391		4089.43	0.670072	0.991844	0.00228779		813.489	0.287938	0.994866	9.27548e-05
1802.87	0.472169	0.993922	0.00161788		1751.57	0.464981	0.99445	0.00107316		4206.69	0.676089	0.971713	0.01326		4085.77	0.669471	0.991746	0.00207265		809.825	0.286641	0.994805	7.01142e-05
1799.2	0.471209	0.994174	0.0011849		1747.9	0.464008	0.994118	0.00112027		4203.03	0.675501	0.972529	0.0124595		4082.11	0.66887	0.991236	0.00165541		806.16	0.285344	0.99525	0.000105213
1795.54	0.470249	0.994633	0.000499925		1744.24	0.463035	0.994069	0.00142649		4199.36	0.674912	0.971709	0.0119682		4078.44	0.668269	0.991499	0.0013814		802.496	0.284047	0.994929	0.00012522
1791.88	0.46929	0.994299	0.000806243		1740.57	0.462062	0.993986	0.00147873		4195.7	0.674323	0.970506	0.0115722		4074.78	0.667668	0.990728	0.00165904		798.832	0.28275	0.995028	0.000252865
1788.21	0.46833	0.99446	0.000740691		1736.91	0.46109	0.994039	0.00140274		4192.03	0.673734	0.970628	0.0107675		4071.11	0.667067	0.990502	0.00179839		795.167	0.281453	0.994733	0.000272333
1784.55	0.46737	0.994326	0.000768933		1733.24	0.460117	0.994154	0.0012153		4188.37	0.673145	0.973217	0.0085614		4067.45	0.666466	0.990797	0.00217026		791.503	0.280156	0.994825	0
1780.88	0.466411	0.99433	0.00106847		1729.58	0.459144	0.994189	0.00133416		4184.71	0.672556	0.97393	0.00715708		4063.78	0.665865	0.99094	0.00199319		787.838	0.278858	0.994886	0.000121449
1777.22	0.465451	0.994004	0.00123224		1725.92	0.458171	0.993971	0.00142805		4181.04	0.671967	0.972229	0.00764427		4060.12	0.665264	0.991483	0.00200697		784.174	0.277562	0.994825	6.07207e-05
1773.55	0.464491	0.993733	0.00160698		1722.25	0.457198	0.993906	0.00170696		4177.38	0.671378	0.970839	0.0105842		4056.45	0.664663	0.991507	0.00228316		780.51	0.276265	0.994967	0.000140254
1769.89	0.463532	0.993672	0.00157618		1718.59	0.456226	0.99421	0.00128166		4173.71	0.670789	0.972053	0.00931769		4052.79	0.664063	0.99193	0.00235045		776.845	0.274967	0.994866	0.000175301
1766.22	0.462572	0.993935	0.00149299		1714.92	0.455253	0.994234	0.000854849		4170.05	0.6702	0.972091	0.00919324		4049.13	0.663461	0.991808	0.00178555		773.181	0.27367	0.994906	9.27612e-05
1762.56	0.461612	0.993999	0.00164212		1711.26	0.45428	0.993953	0.000867367		4166.38	0.669611	0.971154	0.0106301		4045.46	0.662861	0.991749	0.00223406		769.517	0.272374	0.995028	9.27725e-05
1758.9	0.460653	0.99407	0.00140781		1707.59	0.453308	0.994058	0.000637131		4162.72	0.669022	0.971587	0.00888609		4041.8	0.66226	0.992016	0.00179699		765.852	0.271076	0.995048	0.000439417
1755.23	0.459693	0.994338	0.00122101		1703.93	0.452335	0.994284	0.000642628		4159.06	0.668433	0.97085	0.00983981		4038.13	0.661659	0.992488	0.0010299		762.188	0.269779	0.994825	6.07207e-05
1751.57	0.458733	0.99445	0.00107316		1700.27	0.451362	0.994562	0.00114632		4155.39	0.667844	0.972311	0.00848352		4034.47	0.661058	0.993135	0.000615219		758.524	0.268483	0.994927	0.000185529
1747.9	0.457774	0.994118	0.00112027		1696.6	0.450389	0.994204	0.000828012		4151.73	0.667256	0.970773	0.0109017		4030.8	0.660457	0.992863	0.000306611		754.859	0.267185	0.995028	0.000195239
1744.24	0.456814	0.994069	0.00142649		1692.94	0.449416	0.994095	0.00106734		4148.06	0.666667	0.972872	0.00915234		4027.14	0.659856	0.992864	0.000385171		751.195	0.265888	0.995008	0.000242927
1740.57	0.455854	0.993986	0.00147873		1689.27	0.448444	0.993982	0.000852517		4144.4	0.666078	0.971748	0.0106931		4023.47	0.659255	0.992769	0.000524575		747.53	0.264591	0.994805	7.01142e-05
1736.91	0.454895	0.994039	0.00140274		1685.61	0.447471	0.994198	0.000659685		4140.73	0.665489	0.971414	0.0100559		4019.81	0.658654	0.992434	0.000387798		743.866	0.263294	0.994987	0.000175323
1733.24	0.453935	0.994154	0.0012153		1681.94	0.446498	0.994548	0.00029316		4137.07	0.6649	0.971593	0.0118437		4016.15	0.658053	0.992214	0.000511505		740.202	0.261997	0.994947	6.07281e-05
1729.58	0.452975	0.994189	0.00133416		1678.28	0.445525	0.994429	0.000593823		4133.4	0.664311	0.972306	0.00976274		4012.48	0.657452	0.991825	0.000662329		736.537	0.2607	0.994825	0.000105174
1725.92	0.452015	0.993971	0.00142805		1674.61	0.444552	0.994642	0.000422072		4129.74	0.663722	0.971248	0.0102941		4008.82	0.656851	0.991262	0.00109817		732.873	0.259403	0.995089	0.000252881
1722.25	0.451056	0.993906	0.00170696		1670.95	0.44358	0.994819	0.00021635		4126.08	0.663133	0.972475	0.00920925		4005.15	0.65625	0.990616	0.00148705		729.209	0.258106	0.995048	0.000185551
1718.59	0.450096	0.99421	0.00128166		1667.29	0.442607	0.99453	0.00068638		4122.41	0.662544	0.972155	0.00888213		4001.49	0.655649	0.990547	0.00133128		725.544	0.256809	0.995291	0.000494838
1714.92	0.449136	0.994234	0.000854849		1663.62	0.441634	0.994009	0.00121042		4118.75	0.661955	0.971597	0.00989538		3997.82	0.655048	0.991444	0.000970127		721.88	0.255512	0.994866	0.000126409
1711.26	0.448177	0.993953	0.000867367		1659.96	0.440662	0.993833	0.00161563		4115.08	0.661366	0.97202	0.00937289		3994.16	0.654447	0.991107	0.000496187		718.216	0.254215	0.994967	0.000195227
1707.59	0.447217	0.994058	0.000637131		1656.29	0.439689	0.993813	0.00164915		4111.42	0.660777	0.97215	0.0101466		3990.5	0.653846	0.991345	0.000485937		714.551	0.252918	0.994785	3.5056e-05
1703.93	0.446257	0.994284	0.000642628		1652.63	0.438716	0.994133	0.00125484		4107.75	0.660188	0.97319	0.00947869		3986.83	0.653245	0.991834	0.000681878		710.887	0.251621	0.994886	0.000105174
1700.27	0.445298	0.994562	0.00114632		1648.96	0.437743	0.994439	0.000623179		4104.09	0.659599	0.974957	0.00978639		3983.17	0.652644	0.992612	0.000710635		707.222	0.250324	0.994805	3.5056e-05
1696.6	0.444338	0.994204	0.000828012		1645.3	0.43677	0.99435	0.000876822		4100.43	0.659011	0.973106	0.0103802		3979.5	0.652043	0.992644	0.000362092		703.558	0.249027	0.995109	0.000404442
1692.94	0.443378	0.994095	0.00106734		1641.64	0.435798	0.994259	0.0010377		4096.76	0.658422	0.973859	0.00970241		3975.84	0.651442	0.992816	0.000349992		699.894	0.24773	0.994886	0.000105181
1689.27	0.442419	0.993982	0.000852517		1637.97	0.434825	0.994173	0.00118286		4093.1	0.657833	0.975044	0.0102838		3972.17	0.650841	0.993272	0.00046149		696.229	0.246433	0.994993	0.00018382
1685.61	0.441459	0.994198	0.000659685		1634.31	0.433852	0.994263	0.000974464		4089.43	0.657244	0.975317	0.0107218		3968.51	0.65024	0.992777	0.00150181		692.565	0.245136	0.994756	0.000120186
1681.94	0.440499	0.994548	0.00029316		1630.64	0.432879	0.994549	0.000691446		4085.77	0.656655	0.97594	0.0097063		3964.84	0.649639	0.992914	0.00131475		688.901	0.243839	0.994923	0.000217812
1678.28	0.439539	0.994429	0.000593823		1626.98	0.431907	0.994727	0.000180908		4082.1	0.656066	0.976548	0.0107205		3961.18	0.649038	0.992968	0.000854438		685.236	0.242542	0.994826	0.000108706
1674.61	0.43858	0.994642	0.000422072		1623.31	0.430934	0.994765	6.0717e-05		4078.44	0.655477	0.976303	0.0104423		3957.52	0.648437	0.993036	0.000440573		681.572	0.241245	0.994778	4.23553e-05
1670.95	0.43762	0.994819	0.00021635		1619.65	0.429961	0.994967	7.01227e-05		4074.77	0.654888	0.976637	0.0110579		3953.85	0.647837	0.993005	0.000760376		677.907	0.239948	0.994776	0.000440623
1667.29	0.43666	0.99453	0.00068638		1615.98	0.428988	0.994805	3.5056e-05		4071.11	0.654299	0.974413	0.0125951		3950.19	0.647236	0.993085	0.000742936		674.243	0.238651	0.994411	0.000504828
1663.62	0.435701	0.994009	0.00121042		1612.32	0.428016	0.995028	0.000459919		4067.45	0.65371	0.973185	0.0138308		3946.52	0.646635	0.993112	0.000600684		670.579	0.237354	0.994358	0.000859496
1659.96	0.434741	0.993833	0.00161563		1608.66	0.427043	0.994704	6.07133e-05		4063.78	0.653121	0.975527	0.0122354		3942.86	0.646034	0.993279	0.000680911		666.914	0.236057	0.993618	0.000744371
1656.29	0.433781	0.993813	0.00164915		1604.99	0.42607	0.994846	3.50582e-05		4060.12	0.652532	0.974391	0.0126601		3939.2	0.645433	0.9932	0.000922563		663.25	0.23476	0.993528	0.000955846
1652.63	0.432822	0.994133	0.00125484		1601.33	0.425097	0.994765	6.0717e-05		4056.45	0.651943	0.975142	0.0121369		3935.53	0.644832	0.992809	0.000783098		659.586	0.233463	0.993089	0.0015057
1648.96	0.431862	0.994439	0.000623179		1597.66	0.424125	0.994866	7.01184e-05		4052.79	0.651355	0.973539	0.0132006		3931.87	0.644231	0.992722	0.00175826		655.921	0.232166	0.992556	0.00197506
1645.3	0.430902	0.99435	0.000876822		1594	0.423152	0.994619	0.000159781		4049.12	0.650766	0.973895	0.0129361		3928.2	0.64363	0.992312	0.00174288		652.257	0.230869	0.991815	0.00272306
1641.64	0.429942	0.994259	0.0010377		1590.34	0.422179	0.994792	0.000427047		4045.46	0.650177	0.974235	0.0125005		3924.54	0.643029	0.992058	0.00223555		648.593	0.229572	0.991161	0.00380868
1637.97	0.428983	0.994173	0.00118286		1586.67	0.421206	0.994563	0.000193873		4041.8	0.649588	0.975492	0.0114499		3920.87	0.642428	0.992768	0.00165314		644.928	0.228275	0.992106	0.00220607
1634.31	0.428023	0.994263	0.000974464		1583.01	0.420233	0.994838	0.000102643		4038.13	0.648999	0.974512	0.0122929		3917.21	0.641827	0.992485	0.000793845		641.264	0.226978	0.992422	0.00231537
1630.64	0.427063	0.994549	0.000691446		1579.34	0.419261	0.994864	0.000155971		4034.47	0.64841	0.975549	0.0109365		3913.54	0.641226	0.992454	0.000699897		637.599	0.225681	0.992535	0.00178426
1626.98	0.426104	0.994727	0.000180908		1575.68	0.418288	0.995139	0.000499639		4030.8	0.647821	0.973942	0.0122912		3909.88	0.640625	0.992467	0.00109997		633.935	0.224384	0.993266	0.00190288
1623.31	0.425144	0.994765	6.0717e-05		1572.01	0.417315	0.994801	0.000191439		4027.14	0.647232	0.972029	0.0146351		3906.22	0.640024	0.992068	0.00192368		630.271	0.223087	0.993712	0.00151868
1619.65	0.424184	0.994967	7.01227e-05		1568.35	0.416343	0.994968	3.43121e-05		4023.47	0.646643	0.973364	0.0137859		3902.55	0.639423	0.991533	0.00329473		626.606	0.22179	0.993831	0.00140324
1615.98	0.423225	0.994805	3.5056e-05		1564.68	0.41537	0.994765	0.000217764		4019.81	0.646054	0.975542	0.0122753		3898.89	0.638822	0.990397	0.00510678		622.942	0.220493	0.99411	0.000835378
1612.32	0.422265	0.995028	0.000459919		1561.02	0.414397	0.994628	0.000243599		4016.14	0.645465	0.974289	0.0135982		3895.22	0.638221	0.990496	0.00479132		619.278	0.219196	0.994535	0.000917982
1608.66	0.421305	0.994704	6.07133e-05		1557.36	0.413424	0.994785	0.000152806		4012.48	0.644876	0.974398	0.0135388		3891.56	0.63762	0.991191	0.00382594		615.613	0.217899	0.994599	0.000592959
1604.99	0.420345	0.994846	3.50582e-05		1553.69	0.412451	0.994947	0.000315581		4008.82	0.644287	0.974071	0.0143511		3887.89	0.637019	0.991116	0.00371124		611.949	0.216602	0.994713	0.000458343
1601.33	0.419386	0.994765	6.0717e-05		1550.03	0.411479	0.994805	7.01142e-05		4005.15	0.643698	0.974709	0.0133722		3884.23	0.636418	0.991648	0.00295587		608.285	0.215305	0.994775	8.67792e-05
1597.66	0.418426	0.994866	7.01184e-05		1546.36	0.410506	0.995025	0.000623992		4001.49	0.64311	0.976176	0.0132797		3880.57	0.635817	0.992025	0.00329367		604.62	0.214008	0.994849	0.000119972
1594	0.417466	0.994619	0.000159781		1542.7	0.409533	0.994585	0.00030058		3997.82	0.642521	0.974862	0.0141716		3876.9	0.635216	0.992615	0.00129772		600.956	0.212711	0.994848	0.000225247
1590.34	0.416507	0.994792	0.000427047		1539.03	0.40856	0.994346	0.000778789		3994.16	0.641932	0.975156	0.0143848		3873.24	0.634615	0.992713	0.00129357		597.291	0.211414	0.994811	0.000560217
1586.67	0.415547	0.994563	0.000193873		1535.37	0.407587	0.994197	0.00114172		3990.49	0.641343	0.975825	0.01374		3869.57	0.634014	0.992875	0.000833207		593.627	0.210117	0.994218	0.00095574
1583.01	0.414587	0.994838	0.000102643		1531.7	0.406615	0.994246	0.00110867		3986.83	0.640754	0.976404	0.0128658		3865.91	0.633413	0.993349	0.00101872		589.963	0.20882	0.994313	0.000828577
1579.34	0.413628	0.994864	0.000155971		1528.04	0.405642	0.994158	0.000998043		3983.17	0.640165	0.97682	0.0129585		3862.24	0.632812	0.992988	0.00069253		586.298	0.207523	0.99444	0.000775423
1575.68	0.412668	0.995139	0.000499639		1524.38	0.404669	0.994306	0.000901423		3979.5	0.639576	0.976635	0.0137202		3858.58	0.632211	0.992865	0.000885337		582.634	0.206226	0.994121	0.00133735
1572.01	0.411708	0.994801	0.000191439		1520.71	0.403697	0.994326	0.000865288		3975.84	0.638987	0.976046	0.0142477		3854.91	0.631611	0.992666	0.00155184		578.97	0.204929	0.994187	0.00153678
1568.35	0.410749	0.994968	3.43121e-05		1517.05	0.402724	0.994278	0.000950104		3972.17	0.638398	0.976612	0.0137945		3851.25	0.63101	0.9918	0.00273491		575.305	0.203631	0.993718	0.00197238
1564.68	0.409789	0.994765	0.000217764		1513.38	0.401751	0.994265	0.0011289		3968.51	0.637809	0.976853	0.0130356		3847.59	0.630409	0.991343	0.0034178		571.641	0.202335	0.993804	0.00203271
1561.02	0.408829	0.994628	0.000243599		1509.72	0.400778	0.99414	0.00129766		3964.84	0.63722	0.976006	0.0137201		3843.92	0.629808	0.991386	0.00348805		567.977	0.201038	0.993889	0.00178057
1557.36	0.40787	0.994785	0.000152806		1506.05	0.399805	0.994109	0.00135791		3961.18	0.636631	0.975845	0.0138333		3840.26	0.629207	0.991473	0.00347974		564.312	0.19974	0.993856	0.00178473
1553.69	0.40691	0.994947	0.000315581		1502.39	0.398833	0.994004	0.00148338		3957.52	0.636042	0.974906	0.0148489		3836.59	0.628606	0.99153	0.00319517		560.648	0.198444	0.993928	0.00160674
1550.03	0.40595	0.994805	7.01142e-05		1498.73	0.39786	0.993972	0.0014259		3953.85	0.635453	0.975588	0.0139978		3832.93	0.628005	0.99164	0.0032821		556.983	0.197146	0.994247	0.00148257
1546.36	0.40499	0.995025	0.000623992		1495.06	0.396887	0.994245	0.00116402		3950.19	0.634865	0.974893	0.0147054		3829.26	0.627404	0.991571	0.00208782		553.319	0.195849	0.994226	0.00130362
1542.7	0.404031	0.994585	0.00030058		1491.4	0.395914	0.994447	0.00134272		3946.52	0.634276	0.975816	0.0133449		3825.6	0.626803	0.991611	0.00179464		549.655	0.194553	0.994135	0.00130023
1539.03	0.403071	0.994346	0.000778789		1487.73	0.394942	0.994186	0.00131848		3942.86	0.633687	0.975879	0.0138628		3821.93	0.626202	0.991663	0.00188764		545.99	0.193255	0.994292	0.000875243
1535.37	0.402111	0.994197	0.00114172		1484.07	0.393969	0.99433	0.000910955		3939.19	0.633098	0.976073	0.012911		3818.27	0.625601	0.992102	0.00141012		542.326	0.191958	0.99449	0.000548763
1531.7	0.401152	0.994246	0.00110867		1480.4	0.392996	0.994526	0.00107182		3935.53	0.632509	0.97583	0.0136357		3814.61	0.625	0.992583	0.00073305		538.662	0.190662	0.994918	3.05568e-05
1528.04	0.400192	0.994158	0.000998043		1476.74	0.392024	0.994456	0.000643337		3931.86	0.63192	0.976459	0.0131088		3810.94	0.624399	0.99268	0.00114726		534.997	0.189364	0.994749	0.000844086
1524.38	0.399232	0.994306	0.000901423		1473.07	0.391051	0.994464	0.000730595		3928.2	0.631331	0.976922	0.0127475		3807.28	0.623798	0.992567	0.00119437		531.333	0.188067	0.994392	0.000803765
1520.71	0.398273	0.994326	0.000865288		1469.41	0.390078	0.994963	0.000915705		3924.54	0.630742	0.976545	0.0124601		3803.61	0.623197	0.992809	0.00111868		527.668	0.18677	0.994355	0.000695936
1517.05	0.397313	0.994278	0.000950104		1465.75	0.389105	0.994667	0.000420338		3920.87	0.630153	0.976126	0.0125589		3799.95	0.622596	0.992441	0.00178658		524.004	0.185473	0.994657	0.000698316
1513.38	0.396353	0.994265	0.0011289		1462.08	0.388132	0.994602	0.000496019		3917.21	0.629564	0.97691	0.0125209		3796.28	0.621995	0.992124	0.00205115		520.34	0.184176	0.994683	0.000735949
1509.72	0.395394	0.99414	0.00129766		1458.42	0.38716	0.994734	0.000351129		3913.54	0.628975	0.977281	0.0119226		3792.62	0.621394	0.991909	0.00243571		516.675	0.182879	0.994588	0.000575477
1506.05	0.394434	0.994109	0.00135791		1454.75	0.386187	0.994805	7.01142e-05		3909.88	0.628386	0.978011	0.0113791		3788.95	0.620793	0.991722	0.00265994		513.011	0.181582	0.994556	0.000520213
1502.39	0.393474	0.994004	0.00148338		1451.09	0.385214	0.994805	3.5056e-05		3906.21	0.627797	0.977441	0.0115375		3785.29	0.620192	0.991546	0.00283773		509.347	0.180285	0.994656	0.000714253
1498.73	0.392515	0.993972	0.0014259		1447.42	0.384241	0.994765	0		3902.55	0.627208	0.97806	0.0107866		3781.63	0.619591	0.991702	0.00263854		505.682	0.178988	0.99457	0.000607595
1495.06	0.391555	0.994245	0.00116402		1443.76	0.383268	0.994967	0.000213277		3898.89	0.62662	0.977966	0.0110842		3777.96	0.61899	0.991893	0.0021574		502.018	0.177691	0.994587	0.000416534
1491.4	0.390595	0.994447	0.00134272		1440.1	0.382296	0.994677	0.000162784		3895.22	0.626031	0.976916	0.0115795		3774.3	0.618389	0.991988	0.00188285		498.354	0.176394	0.994519	0.000478557
1487.73	0.389635	0.994186	0.00131848		1436.43	0.381323	0.994827	0.000262956		3891.56	0.625442	0.97691	0.0119172		3770.63	0.617788	0.992051	0.00196898		494.689	0.175097	0.994694	0.000413634
1484.07	0.388676	0.99433	0.000910955		1432.77	0.38035	0.994719	0.000194104		3887.89	0.624853	0.977135	0.0110224		3766.97	0.617187	0.992103	0.00191327		491.025	0.1738	0.994842	0.000121821
1480.4	0.387716	0.994526	0.00107182		1429.1	0.379378	0.994691	0.00034308		3884.23	0.624264	0.976446	0.0115887		3763.3	0.616587	0.992517	0.00146403		487.36	0.172503	0.995048	0.000439417
1476.74	0.386756	0.994456	0.000643337		1425.44	0.378405	0.994625	0.00039202		3880.56	0.623675	0.976201	0.0111519		3759.64	0.615986	0.99251	0.00130655		483.696	0.171206	0.994927	7.01227e-05
1473.07	0.385797	0.994464	0.000730595		1421.77	0.377432	0.994411	0.000614944		3876.9	0.623086	0.976278	0.0109024		3755.98	0.615385	0.992438	0.00130605		480.032	0.169909	0.994886	6.07244e-05
1469.41	0.384837	0.994963	0.000915705		1418.11	0.376459	0.994498	0.000683163		3873.23	0.622497	0.975036	0.0111222		3752.31	0.614784	0.992435	0.00145008		476.367	0.168612	0.994927	0.000152824
1465.75	0.383877	0.994667	0.000420338		1414.44	0.375486	0.994479	0.00108362		3869.57	0.621908	0.974317	0.0121693		3748.65	0.614183	0.992389	0.00116926		472.703	0.167315	0.995165	0.000729927
1462.08	0.382917	0.994602	0.000496019		1410.78	0.374514	0.994257	0.00114667		3865.91	0.621319	0.97428	0.0132411		3744.98	0.613582	0.992499	0.00192101		469.039	0.166018	0.994824	0.00038145
1458.42	0.381958	0.994734	0.000351129		1407.12	0.373541	0.994259	0.00114837		3862.24	0.62073	0.975622	0.0123005		3741.32	0.612981	0.992739	0.00079643		465.374	0.164721	0.994917	0.000168048
1454.75	0.380998	0.994805	7.01142e-05		1403.45	0.372568	0.993978	0.00130944		3858.58	0.620141	0.976091	0.0119088		3737.65	0.61238	0.993268	0.000563247		461.71	0.163424	0.994716	0.00037907
1451.09	0.380038	0.994805	3.5056e-05		1399.79	0.371595	0.994051	0.00155152		3854.91	0.619552	0.978257	0.0107739		3733.99	0.611779	0.993026	0.000665011		458.046	0.162127	0.994647	0.000475355
1447.42	0.379079	0.994765	0		1396.12	0.370622	0.9939	0.00171271		3851.25	0.618963	0.977371	0.0119046		3730.33	0.611178	0.992833	0.000558459		454.381	0.16083	0.994391	0.000700702
1443.76	0.378119	0.994967	0.000213277		1392.46	0.36965	0.993888	0.00162752		3847.58	0.618374	0.976282	0.0130518		3726.66	0.610577	0.992323	0.000733161		450.717	0.159533	0.994728	0.00055763
1440.1	0.377159	0.994677	0.000162784		1388.79	0.368677	0.993977	0.00146991		3843.92	0.617786	0.977173	0.012936		3723	0.609976	0.991919	0.00198279		447.052	0.158236	0.994883	0.000383808
1436.43	0.3762	0.994827	0.000262956		1385.13	0.367704	0.99399	0.00155383		3840.26	0.617197	0.977492	0.0129796		3719.33	0.609375	0.991533	0.00219312		443.388	0.156939	0.994867	0.000125604
1432.77	0.37524	0.994719	0.000194104		1381.47	0.366732	0.993936	0.00159301		3836.59	0.616608	0.977535	0.0133275		3715.67	0.608774	0.99226	0.00197618		439.724	0.155642	0.995011	0.00021718
1429.1	0.37428	0.994691	0.00034308		1377.8	0.365759	0.994118	0.00149071		3832.93	0.616019	0.978642	0.0128883		3712	0.608173	0.992062	0.00243145		436.059	0.154345	0.994832	0.000111347
1425.44	0.37332	0.994625	0.00039202		1374.14	0.364786	0.994166	0.00176514		3829.26	0.61543	0.9796	0.0119874		3708.34	0.607572	0.991944	0.00200776		432.395	0.153048	0.995312	0.00100403
1421.77	0.372361	0.994411	0.000614944		1370.47	0.363813	0.994085	0.00123092		3825.6	0.614841	0.979497	0.0119097		3704.68	0.606971	0.991737	0.0026609		428.731	0.151751	0.994719	0.000193815
1418.11	0.371401	0.994498	0.000683163		1366.81	0.362841	0.994344	0.00115568		3821.93	0.614252	0.979903	0.0117573		3701.01	0.60637	0.991403	0.00223631		425.066	0.150454	0.994542	0.000543664
1414.44	0.370441	0.994479	0.00108362		1363.14	0.361868	0.994779	0.000573909		3818.27	0.613663	0.981315	0.010153		3697.35	0.605769	0.991406	0.00226515		421.402	0.149157	0.994823	0.000441341
1410.78	0.369482	0.994257	0.00114667		1359.48	0.360895	0.994605	0.00070006		3814.6	0.613074	0.981528	0.00999353		3693.68	0.605168	0.991569	0.00202988		417.737	0.14786	0.994523	0.000688197
1407.12	0.368522	0.994259	0.00114837		1355.82	0.359922	0.994787	0.000620116		3810.94	0.612485	0.982041	0.00942209		3690.02	0.604567	0.991779	0.00168845		414.073	0.146563	0.994575	0.00043816
1403.45	0.367562	0.993978	0.00130944		1352.15	0.358949	0.994623	0.000252783		3807.28	0.611896	0.981718	0.00959604		3686.35	0.603966	0.991378	0.00126267		410.409	0.145266	0.994866	9.27548e-05
1399.79	0.366603	0.994051	0.00155152		1348.49	0.357977	0.994634	0.000385478		3803.61	0.611307	0.982024	0.00778081		3682.69	0.603365	0.991945	0.00103368		406.744	0.143969	0.994866	3.50582e-05
1396.12	0.365643	0.9939	0.00171271		1344.82	0.357004	0.994843	9.37517e-05		3799.95	0.610719	0.984717	0.00534828		3679.02	0.602764	0.991848	0.000901083		403.08	0.142672	0.994846	0.000126399
1392.46	0.364683	0.993888	0.00162752		1341.16	0.356031	0.99462	0.000409251		3796.28	0.610129	0.986085	0.00513135		3675.36	0.602163	0.992423	0.0013627		399.416	0.141375	0.995098	0.000503491
1388.79	0.363724	0.993977	0.00146991		1337.49	0.355058	0.994617	0.000570933		3792.62	0.609541	0.987933	0.0041782		3671.7	0.601562	0.992525	0.000945926		395.751	0.140078	0.994671	0.000267968
1385.13	0.362764	0.99399	0.00155383		1333.83	0.354086	0.994354	0.000714034		3788.95	0.608952	0.988718	0.00497713		3668.03	0.600962	0.992822	0.000531621		392.087	0.138781	0.994822	0.000166486
1381.47	0.361804	0.993936	0.00159301		1330.16	0.353113	0.994208	0.000966213		3785.29	0.608363	0.989458	0.00518128		3664.37	0.600361	0.992914	0.000622219		388.423	0.137484	0.995028	0.000311675
1377.8	0.360845	0.994118	0.00149071		1326.5	0.35214	0.994334	0.0007991		3781.63	0.607774	0.989608	0.00516274		3660.7	0.59976	0.992983	0.00128927		384.758	0.136187	0.994732	0.000332292
1374.14	0.359885	0.994166	0.00176514		1322.84	0.351167	0.994474	0.000621334		3777.96	0.607185	0.990012	0.00532292		3657.04	0.599159	0.992561	0.000943619		381.094	0.13489	0.994696	0.000383407
1370.47	0.358925	0.994085	0.00123092		1319.17	0.350195	0.994699	0.000753906		3774.3	0.606596	0.990049	0.00472084		3653.37	0.598558	0.992589	0.000837996		377.429	0.133592	0.995165	0.000777831
1366.81	0.357966	0.994344	0.00115568		1315.51	0.349222	0.994723	0.000497165		3770.63	0.606007	0.990013	0.00498671		3649.71	0.597957	0.992409	0.000888226		373.765	0.132296	0.994858	0.00013092
1363.14	0.357006	0.994779	0.000573909		1311.84	0.348249	0.994478	0.000550543		3766.97	0.605418	0.989996	0.00493848		3646.05	0.597356	0.991949	0.000858617		370.101	0.130999	0.994469	0.000393984
1359.48	0.356046	0.994605	0.00070006		1308.18	0.347276	0.994414	0.000711861		3763.3	0.604829	0.989541	0.00549207		3642.38	0.596755	0.992625	0.000614016		366.436	0.129701	0.994321	0.000703685
1355.82	0.355086	0.994787	0.000620116		1304.51	0.346303	0.99406	0.00122263		3759.64	0.60424	0.98895	0.00617687		3638.72	0.596154	0.992613	0.000743621		362.772	0.128405	0.994881	0.000227794
1352.15	0.354127	0.994623	0.000252783		1300.85	0.345331	0.994274	0.00128298		3755.98	0.603651	0.989009	0.00631219		3635.05	0.595553	0.992787	0.000296493		359.108	0.127108	0.995006	0.000263953
1348.49	0.353167	0.994634	0.000385478		1297.19	0.344358	0.994327	0.0011258		3752.31	0.603062	0.988632	0.00721872		3631.39	0.594952	0.992824	0.00067486		355.443	0.12581	0.994927	9.27604e-05
1344.82	0.352207	0.994843	9.37517e-05		1293.52	0.343385	0.994336	0.0011694		3748.65	0.602474	0.987901	0.00868242		3627.72	0.594351	0.992702	0.000473298		351.779	0.124514	0.995048	0.000213288
1341.16	0.351248	0.99462	0.000409251		1289.86	0.342413	0.994115	0.00133735		3744.98	0.601885	0.988728	0.00721525		3624.06	0.59375	0.992903	0.000574172		348.115	0.123217	0.994825	0.000121441
1337.49	0.350288	0.994617	0.000570933		1286.19	0.34144	0.993804	0.00187474		3741.32	0.601296	0.988023	0.00804988		3620.39	0.593149	0.992423	0.00110039		344.45	0.121919	0.994846	7.01142e-05
1333.83	0.349328	0.994354	0.000714034		1282.53	0.340467	0.994259	0.00113852		3737.65	0.600707	0.988249	0.00717058		3616.73	0.592548	0.992435	0.00158452		340.786	0.120623	0.994967	0.00025285
1330.16	0.348369	0.994208	0.000966213		1278.86	0.339494	0.994479	0.000555079		3733.99	0.600118	0.988613	0.00550777		3613.07	0.591947	0.991639	0.0024863		337.121	0.119325	0.994906	0.000175291
1326.5	0.347409	0.994334	0.0007991		1275.2	0.338521	0.994582	0.000369486		3730.32	0.599529	0.987381	0.00702721		3609.4	0.591346	0.991833	0.00249563		333.457	0.118028	0.994756	0.00065734
1322.84	0.346449	0.994474	0.000621334		1271.53	0.337549	0.994531	0.000465407		3726.66	0.59894	0.985949	0.00651139		3605.74	0.590745	0.991642	0.00216108		329.793	0.116732	0.994445	0.000504373
1319.17	0.34549	0.994699	0.000753906		1267.87	0.336576	0.994213	0.00106252		3723	0.598351	0.983908	0.00702491		3602.07	0.590144	0.991962	0.00133086		326.128	0.115434	0.993681	0.000992163
1315.51	0.34453	0.994723	0.000497165		1264.21	0.335603	0.994031	0.00127107		3719.33	0.597762	0.982772	0.00834819		3598.41	0.589543	0.992275	0.00119352		322.464	0.114137	0.994265	0.000597079
1311.84	0.34357	0.994478	0.000550543		1260.54	0.33463	0.994233	0.00171614		3715.67	0.597173	0.980871	0.00953989		3594.74	0.588942	0.992573	0.000638947		318.8	0.112841	0.99418	0.000682601
1308.18	0.34261	0.994414	0.000711861		1256.88	0.333658	0.994084	0.00144199		3712	0.596584	0.980165	0.00989924		3591.08	0.588341	0.991509	0.00178508		315.135	0.111543	0.993667	0.000954771
1304.51	0.341651	0.99406	0.00122263		1253.21	0.332685	0.994353	0.00133475		3708.34	0.595995	0.978709	0.0100549		3587.41	0.58774	0.991413	0.00230909		311.471	0.110246	0.993967	0.00118579
1300.85	0.340691	0.994274	0.00128298		1249.55	0.331712	0.994459	0.000952199		3704.67	0.595406	0.979354	0.00913162		3583.75	0.587139	0.991126	0.0021901		307.807	0.10895	0.994185	0.00111602
1297.19	0.339731	0.994327	0.0011258		1245.88	0.330739	0.994423	0.000594557		3701.01	0.594817	0.978797	0.00923829		3580.09	0.586538	0.991003	0.00290036		304.142	0.107652	0.994314	0.00093151
1293.52	0.338772	0.994336	0.0011694		1242.22	0.329767	0.994665	0.000596542		3697.35	0.594228	0.978657	0.00889283		3576.42	0.585937	0.991076	0.00256966		300.478	0.106355	0.994434	0.000505793
1289.86	0.337812	0.994115	0.00133735		1238.56	0.328794	0.99442	0.000704733		3693.68	0.59364	0.978615	0.00905623		3572.76	0.585336	0.991257	0.00285023		296.813	0.105058	0.9949	0.000244178
1286.19	0.336852	0.993804	0.00187474		1234.89	0.327821	0.994417	0.000601461		3690.02	0.593051	0.978095	0.0087773		3569.09	0.584736	0.990939	0.00213109		293.149	0.103761	0.994889	0.000178201
1282.53	0.335893	0.994259	0.00113852		1231.23	0.326848	0.994341	0.00111275		3686.35	0.592462	0.977352	0.00983642		3565.43	0.584135	0.990997	0.00245256		289.485	0.102464	0.994715	0.000718977
1278.86	0.334933	0.994479	0.000555079		1227.56	0.325876	0.994329	0.00101711		3682.69	0.591873	0.976742	0.0100052		3561.76	0.583534	0.991717	0.00153784		285.82	0.101167	0.994223	0.00125893
1275.2	0.333973	0.994582	0.000369486		1223.9	0.324903	0.994249	0.0010511		3679.02	0.591284	0.976317	0.0112362		3558.1	0.582933	0.991961	0.00101033		282.156	0.0998702	0.9938	0.00193446
1271.53	0.333013	0.994531	0.000465407		1220.23	0.32393	0.994446	0.000933191		3675.36	0.590695	0.975735	0.0112269		3554.44	0.582332	0.992265	0.000348574		278.492	0.0985734	0.994021	0.00155173
1267.87	0.332054	0.994213	0.00106252		1216.57	0.322957	0.9946	0.000846804		3671.69	0.590106	0.97857	0.00889813		3550.77	0.581731	0.992417	0.000301664		274.827	0.0972761	0.994567	0.000765943
1264.21	0.331094	0.994031	0.00127107		1212.9	0.321984	0.994559	0.000515639		3668.03	0.589517	0.978392	0.00955042		3547.11	0.58113	0.992715	0.000458586		271.163	0.0959792	0.994658	0.000400532
1260.54	0.330134	0.994233	0.00171614		1209.24	0.321012	0.994446	0.000605285		3664.37	0.588928	0.977979	0.00981886		3543.44	0.580529	0.993066	0.000424295		267.498	0.094682	0.994646	0.000629137
1256.88	0.329175	0.994084	0.00144199		1205.58	0.320039	0.994491	0.000638544		3660.7	0.588339	0.9787	0.00848795		3539.78	0.579928	0.993046	0.000598086		263.834	0.0933851	0.994435	0.000781424
1253.21	0.328215	0.994353	0.00133475		1201.91	0.319066	0.994513	0.000648185		3657.04	0.58775	0.98003	0.00754751		3536.11	0.579327	0.992743	0.000493575		260.17	0.0920882	0.994627	0.000636906
1249.55	0.327255	0.994459	0.000952199		1198.25	0.318093	0.994646	0.000470248		3653.37	0.587161	0.980677	0.00688572		3532.45	0.578726	0.992581	0.000538549		256.505	0.090791	0.99473	0.000428339
1245.88	0.326296	0.994423	0.000594557		1194.58	0.317121	0.994599	0.000392713		3649.71	0.586572	0.981271	0.0059865		3528.78	0.578125	0.99246	0.000320797		252.841	0.0894941	0.994305	0.00106215
1242.22	0.325336	0.994665	0.000596542		1190.92	0.316148	0.994415	0.000658467		3646.04	0.585983	0.980428	0.00660116		3525.12	0.577524	0.992182	0.000119157		249.177	0.0881972	0.994223	0.00141213
1238.56	0.324376	0.99442	0.000704733		1187.26	0.315175	0.99454	0.000508918		3642.38	0.585395	0.980321	0.00700623		3521.46	0.576923	0.992023	0.000926178		245.512	0.0869	0.994181	0.00122109
1234.89	0.323416	0.994417	0.000601461		1183.59	0.314202	0.994991	0.000305544		3638.72	0.584806	0.980654	0.00627701		3517.79	0.576322	0.992068	0.000472349		241.848	0.0856031	0.994415	0.000763952
1231.23	0.322457	0.994341	0.00111275		1179.93	0.31323	0.994845	3.45776e-05		3635.05	0.584217	0.980637	0.00673124		3514.13	0.575721	0.992193	0.000318596		238.184	0.0843062	0.99433	0.000964401
1227.56	0.321497	0.994329	0.00101711		1176.26	0.312257	0.994777	0.000164375		3631.39	0.583628	0.980088	0.00762776		3510.46	0.57512	0.992104	0.000325838		234.519	0.0830089	0.994206	0.00112949
1223.9	0.320537	0.994249	0.0010511		1172.6	0.311284	0.994814	0.000105199		3627.72	0.583039	0.980377	0.00758146		3506.8	0.574519	0.99205	0.000448914		230.855	0.081712	0.994681	0.000723492
1220.23	0.319578	0.994446	0.000933191		1168.93	0.310311	0.99472	0.000134139		3624.06	0.58245	0.981236	0.00632585		3503.14	0.573918	0.992077	0.000716641		227.19	0.0804148	0.994473	0.000717451
1216.57	0.318618	0.9946	0.000846804		1165.27	0.309338	0.994901	0.000281855		3620.39	0.581861	0.982672	0.00602162		3499.47	0.573317	0.992405	0.000169468		223.526	0.0791179	0.994247	0.00158699
1212.9	0.317658	0.994559	0.000515639		1161.6	0.308366	0.994711	0.000111369		3616.73	0.581272	0.983222	0.0057254		3495.81	0.572716	0.992905	0.00022811		219.862	0.077821	0.994004	0.00163032
1209.24	0.316699	0.994446	0.000605285		1157.94	0.307393	0.994651	0.000407343		3613.06	0.580683	0.982736	0.00554162		3492.14	0.572115	0.992517	0.000469557		216.197	0.0765238	0.993516	0.00143205
1205.58	0.315739	0.994491	0.000638544		1154.28	0.30642	0.994618	0.000468299		3609.4	0.580094	0.984063	0.0045479		3488.48	0.571514	0.992165	0.0010838		212.533	0.0752269	0.993899	0.00125609
1201.91	0.314779	0.994513	0.000648185		1150.61	0.305448	0.994736	0.0005241		3605.74	0.579505	0.983569	0.00518919		3484.81	0.570913	0.992564	0.000750497		208.869	0.07393	0.99431	0.00118359
1198.25	0.31382	0.994646	0.000470248		1146.95	0.304475	0.994807	0.000353434		3602.07	0.578916	0.983766	0.00481503		3481.15	0.570312	0.992602	0.000722945		205.204	0.0726328	0.994285	0.00109816
1194.58	0.31286	0.994599	0.000392713		1143.28	0.303502	0.994725	0.000344142		3598.41	0.578327	0.982842	0.00518666		3477.48	0.569712	0.992541	0.000647846		201.54	0.0713359	0.994054	0.000832147
1190.92	0.3119	0.994415	0.000658467		1139.62	0.302529	0.994607	0.000338933		3594.74	0.577738	0.983003	0.00530396		3473.82	0.569111	0.992662	0.000722989		197.876	0.070039	0.993903	0.000980013
1187.26	0.310941	0.99454	0.000508918		1135.95	0.301556	0.994754	0.000178232		3591.08	0.57715	0.983015	0.0055896		3470.16	0.56851	0.992521	0.00069876		194.211	0.0687418	0.994375	0.000527244
1183.59	0.309981	0.994991	0.000305544		1132.29	0.300584	0.994785	3.5056e-05		3587.41	0.576561	0.983287	0.00576176		3466.49	0.567909	0.992783	0.000619054		190.547	0.0674449	0.994123	0.000752042
1179.93	0.309021	0.994845	3.45776e-05		1128.62	0.299611	0.994765	0		3583.75	0.575972	0.983212	0.00466526		3462.83	0.567308	0.992743	0.000667471		186.882	0.0661476	0.99419	0.000536159
1176.26	0.308062	0.994777	0.000164375		1124.96	0.298638	0.994866	9.27548e-05		3580.09	0.575383	0.982152	0.00585227		3459.16	0.566707	0.992561	0.000664672		183.218	0.0648507	0.994428	0.000486833
1172.6	0.307102	0.994814	0.000105199		1121.3	0.297665	0.994846	0.000126399		3576.42	0.574794	0.981568	0.00466781		3455.5	0.566106	0.992541	0.000529348		179.554	0.0635539	0.994425	0.000325869
1168.93	0.306142	0.99472	0.000134139		1117.63	0.296693	0.994683	0.000154493		3572.76	0.574205	0.980688	0.00697109		3451.83	0.565505	0.992629	0.00129782		175.889	0.0622566	0.994308	0.00046987
1165.27	0.305182	0.994901	0.000281855		1113.97	0.29572	0.994795	0.000169343		3569.09	0.573616	0.980465	0.00780484		3448.17	0.564904	0.992698	0.000967273		172.225	0.0609597	0.994104	0.00111174
1161.6	0.304223	0.994711	0.000111369		1110.3	0.294747	0.99486	0.000133771		3565.43	0.573027	0.980414	0.00754561		3444.51	0.564303	0.992602	0.000730426		168.561	0.0596628	0.994178	0.00106901
1157.94	0.303263	0.994651	0.000407343		1106.64	0.293774	0.994636	0.00060146		3561.76	0.572438	0.979819	0.00906992		3440.84	0.563702	0.992596	0.000477669		164.896	0.0583656	0.994412	0.000466329
1154.28	0.302303	0.994618	0.000468299		1102.97	0.292802	0.994646	0.000311444		3558.1	0.571849	0.979807	0.00869246		3437.18	0.563101	0.992331	0.000415802		161.232	0.0570687	0.994609	0.00024763
1150.61	0.301344	0.994736	0.0005241		1099.31	0.291829	0.994691	0.000697946		3554.43	0.57126	0.980219	0.00924374		3433.51	0.5625	0.99217	4.23523e-05		157.568	0.0557718	0.994619	0.000194794
1146.95	0.300384	0.994807	0.000353434		1095.64	0.290856	0.994392	0.000648365		3550.77	0.570671	0.979787	0.009323		3429.85	0.561899	0.992295	0.000315788		153.903	0.0544746	0.994497	0.000571411
1143.28	0.299424	0.994725	0.000344142		1091.98	0.289883	0.994405	0.000836318		3547.11	0.570082	0.980026	0.00940793		3426.18	0.561298	0.991944	0.000562301		150.239	0.0531777	0.994734	0.000585675
1139.62	0.298465	0.994607	0.000338933		1088.32	0.288911	0.994322	0.000873673		3543.44	0.569493	0.980983	0.00878182		3422.52	0.560697	0.992442	0.000372997		146.574	0.0518805	0.994563	0.000514592
1135.95	0.297505	0.994754	0.000178232		1084.65	0.287938	0.994439	0.000840657		3539.78	0.568905	0.980802	0.00965011		3418.85	0.560096	0.992395	6.10016e-05		142.91	0.0505836	0.99472	0.000397571
1132.29	0.296545	0.994785	3.5056e-05		1080.99	0.286965	0.994528	0.000569294		3536.11	0.568316	0.980758	0.0105148		3415.19	0.559495	0.992343	0.000489863		139.246	0.0492867	0.994319	0.00114117
1128.62	0.295586	0.994765	0		1077.32	0.285992	0.99456	0.000565351		3532.45	0.567727	0.981642	0.00962578		3411.53	0.558894	0.99244	0.000334404		135.581	0.0479894	0.993828	0.000905969
1124.96	0.294626	0.994866	9.27548e-05		1073.66	0.285019	0.994636	0.000493452		3528.78	0.567138	0.982588	0.00837929		3407.86	0.558293	0.991944	0.000310298		131.917	0.0466925	0.993564	0.00166767
1121.3	0.293666	0.994846	0.000126399		1069.99	0.284047	0.994611	0.000491728		3525.12	0.566549	0.982743	0.00719606		3404.2	0.557692	0.992522	0.000305337		128.253	0.0453957	0.993982	0.000774835
1117.63	0.292706	0.994683	0.000154493		1066.33	0.283074	0.994927	9.27604e-05		3521.46	0.56596	0.983254	0.00723637		3400.53	0.557091	0.992601	0.000211449		124.588	0.0440984	0.994529	0.0005135
1113.97	0.291747	0.994795	0.000169343		1062.67	0.282101	0.994765	6.0717e-05		3517.79	0.565371	0.984374	0.00698752		3396.87	0.55649	0.992047	0.000302186		120.924	0.0428015	0.994447	0.000496614
1110.3	0.290787	0.99486	0.000133771		1059	0.281128	0.994947	0.000105181		3514.13	0.564782	0.984648	0.00656217		3393.2	0.555889	0.991575	0.000921261		117.259	0.0415043	0.993499	0.000433991
1106.64	0.289827	0.994636	0.00060146		1055.34	0.280156	0.994805	0.000126401		3510.46	0.564193	0.984722	0.00629		3389.54	0.555288	0.991648	0.00165145		113.595	0.0402074	0.993284	0.000677847
1102.97	0.288868	0.994646	0.000311444		1051.67	0.279183	0.994886	0.000105181		3506.8	0.563604	0.984749	0.00656431		3385.88	0.554688	0.991294	0.00130857		109.931	0.0389105	0.993564	0.00098165
1099.31	0.287908	0.994691	0.000697946		1048.01	0.27821	0.994765	0.000121434		3503.13	0.563015	0.984537	0.00687284		3382.21	0.554086	0.991452	0.00133225		106.266	0.0376133	0.993812	0.00096259
1095.64	0.286948	0.994392	0.000648365		1044.34	0.277237	0.995028	0.000355895		3499.47	0.562426	0.984252	0.00776184		3378.55	0.553486	0.991922	0.00125256		102.602	0.0363164	0.993795	0.000790899
1091.98	0.285988	0.994405	0.000836318		1040.68	0.276265	0.994886	0.000182173		3495.8	0.561837	0.983489	0.00916358		3374.88	0.552885	0.991563	0.000926057		98.938	0.0350195	0.994121	0.000763532
1088.32	0.285029	0.994322	0.000873673		1037.02	0.275292	0.994906	0.000140245		3492.14	0.561249	0.982576	0.00977017		3371.22	0.552284	0.991865	0.000718983		95.273	0.0337223	0.994357	0.00125086
1084.65	0.284069	0.994439	0.000840657		1033.35	0.274319	0.994866	0.000126409		3488.48	0.56066	0.982997	0.00938217		3367.55	0.551683	0.992141	0.00039594		91.609	0.0324254	0.993028	0.000841811
1080.99	0.283109	0.994528	0.000569294		1029.69	0.273346	0.994632	0.000389084		3484.81	0.560071	0.982649	0.00905997		3363.89	0.551082	0.99208	0.000509557		87.945	0.0311285	0.992507	0.000761712
1077.32	0.28215	0.99456	0.000565351		1026.02	0.272374	0.994664	0.000333397		3481.15	0.559482	0.982017	0.00994157		3360.22	0.550481	0.991789	0.000586661		84.28	0.0298312	0.992556	0.000558193
1073.66	0.28119	0.994636	0.000493452		1022.36	0.271401	0.994715	0.000226344		3477.48	0.558893	0.981629	0.00890054		3356.56	0.54988	0.991965	0.000762791		80.616	0.0285344	0.993042	0.00047987
1069.99	0.28023	0.994611	0.000491728		1018.69	0.270428	0.994545	0.000339579		3473.82	0.558304	0.981154	0.0099033		3352.9	0.549279	0.99147	0.000430503		76.951	0.0272371	0.993021	0.00135648
1066.33	0.279271	0.994927	9.27604e-05		1015.03	0.269455	0.99454	0.000602706		3470.15	0.557715	0.982057	0.0093464		3349.23	0.548678	0.991246	0.00109187		73.287	0.0259402	0.99325	0.00151943
1062.67	0.278311	0.994765	6.0717e-05		1011.36	0.268483	0.994805	9.27491e-05		3466.49	0.557126	0.981134	0.00953296		3345.57	0.548077	0.991019	0.000577646		69.623	0.0246433	0.993636	0.00170495
1059	0.277351	0.994947	0.000105181		1007.7	0.26751	0.994805	9.27491e-05		3462.83	0.556537	0.982201	0.00913584		3341.9	0.547476	0.991233	0.000450282		65.958	0.0233461	0.993986	0.00166537
1055.34	0.276391	0.994805	0.000126401		1004.04	0.266537	0.994947	6.07281e-05		3459.16	0.555948	0.983092	0.00823606		3338.24	0.546875	0.991071	0.000611523		62.294	0.0220492	0.993997	0.00169882
1051.67	0.275432	0.994886	0.000105181		1000.37	0.265564	0.994967	9.27669e-05		3455.5	0.555359	0.984245	0.00752688		3334.57	0.546274	0.991522	0.00107581		58.63	0.0207523	0.99375	0.00207459
1048.01	0.274472	0.994765	0.000121434		996.708	0.264592	0.994878	0.000133759		3451.83	0.55477	0.985381	0.00758593		3330.91	0.545673	0.99113	0.00189701		54.965	0.0194551	0.993848	0.00179887
1044.34	0.273512	0.995028	0.000355895		993.043	0.263619	0.994833	0.000147369		3448.17	0.554181	0.986233	0.00735159		3327.24	0.545072	0.990735	0.00192894		51.301	0.0181582	0.993796	0.00178358
1040.68	0.272553	0.994886	0.000182173		989.379	0.262646	0.994804	0.000461555		3444.5	0.553592	0.986024	0.00831456		3323.58	0.544471	0.991081	0.00185204		47.637	0.0168613	0.993917	0.00183681
1037.02	0.271593	0.994906	0.000140245		985.714	0.261673	0.994695	0.000256099		3440.84	0.553004	0.986243	0.00866061		3319.92	0.54387	0.991891	0.00140144		43.972	0.0155641	0.99358	0.0020884
1033.35	0.270633	0.994866	0.000126409		982.05	0.2607	0.994911	0.000101183		3437.18	0.552415	0.986026	0.00941467		3316.25	0.543269	0.992445	0.000914426		40.308	0.0142672	0.993754	0.00185245
1029.69	0.269674	0.994632	0.000389084		978.386	0.259728	0.994909	8.8877e-05		3433.51	0.551826	0.985466	0.00990511		3312.59	0.542668	0.99244	0.000985081		36.643	0.0129699	0.993659	0.00140421
1026.02	0.268714	0.994664	0.000333397		974.721	0.258755	0.994755	0.000234287		3429.85	0.551237	0.986207	0.00916087		3308.92	0.542067	0.992525	0.000673501		32.979	0.011673	0.994233	0.00047579
1022.36	0.267754	0.994715	0.000226344		971.057	0.257782	0.994724	0.000385455		3426.18	0.550648	0.986966	0.00860971		3305.26	0.541466	0.991899	0.00181798		29.315	0.0103762	0.994399	0.000954801
1018.69	0.266795	0.994545	0.000339579		967.393	0.256809	0.994682	0.000407677		3422.52	0.550059	0.987101	0.00793589		3301.59	0.540865	0.991408	0.00266052		25.65	0.00907892	0.994284	0.00104366
1015.03	0.265835	0.99454	0.000602706		963.728	0.255837	0.994584	0.000366017		3418.85	0.54947	0.987166	0.00690608		3297.93	0.540264	0.991617	0.00185809		21.986	0.00778203	0.994163	0.0011496
1011.36	0.264875	0.994805	9.27491e-05		960.064	0.254864	0.994788	9.19571e-05		3415.19	0.548881	0.987556	0.0050106		3294.27	0.539664	0.991945	0.00109928		18.322	0.00648514	0.993059	0.00179682
1007.7	0.263916	0.994805	9.27491e-05		956.4	0.253891	0.995048	0.000305698		3411.53	0.548292	0.987444	0.0047544		3290.6	0.539062	0.992622	0.00103956		14.657	0.0051879	0.992506	0.00258074
1004.04	0.262956	0.994947	6.07281e-05		952.735	0.252918	0.994967	7.01227e-05		3407.86	0.547703	0.987699	0.00447024		3286.94	0.538462	0.99242	0.00100898		10.993	0.00389102	0.992943	0.00247338
1000.37	0.261996	0.994967	9.27669e-05		949.071	0.251946	0.994765	0.000105168		3404.2	0.547114	0.987863	0.00363993		3283.27	0.53786	0.992602	0.000979689		7.329	0.00259413	0.993176	0.00220735
996.708	0.261037	0.994878	0.000133759		945.406	0.250973	0.994907	7.04028e-05		3400.53	0.546525	0.988099	0.00289028		3279.61	0.53726	0.992642	0.000734744		3.664	0.00129689	0.992919	0.00194656
993.043	0.260077	0.994833	0.000147369		941.742	0.25	0.994886	0.000160668		3396.87	0.545936	0.987562	0.00252505		3275.94	0.536659	0.992501	0.000941275		0	0	0.992576	0.00233724
989.379	0.259117	0.994804	0.000461555		938.078	0.249027	0.995089	0.000345339		3393.2	0.545347	0.986438	0.00410964		3272.28	0.536058	0.992238	0.000876468
985.714	0.258157	0.994695	0.000256099		934.413	0.248054	0.994886	6.07244e-05		3389.54	0.544759	0.985582	0.00415106		3268.61	0.535457	0.992028	0.00124732
982.05	0.257198	0.994911	0.000101183		930.749	0.247082	0.995251	0.000585907		3385.87	0.54417	0.984784	0.00564835		3264.95	0.534856	0.992052	0.00121912
978.386	0.256238	0.994909	8.8877e-05		927.085	0.246109	0.994846	0.000152816		3382.21	0.543581	0.984216	0.00595992		3261.29	0.534255	0.991699	0.00200673
974.721	0.255278	0.994755	0.000234287		923.42	0.245136	0.994825	6.07207e-05		3378.55	0.542992	0.98444	0.00566973		3257.62	0.533654	0.991213	0.00244095
971.057	0.254319	0.994724	0.000385455		919.756	0.244163	0.994967	0.000273848		3374.88	0.542403	0.983208	0.00749619		3253.96	0.533053	0.990467	0.0035988
967.393	0.253359	0.994682	0.000407677		916.092	0.243191	0.994947	0.000182184		3371.22	0.541814	0.982927	0.00764202		3250.29	0.532452	0.990355	0.00432836
963.728	0.252399	0.994584	0.000366017		912.427	0.242218	0.994866	7.01184e-05		3367.55	0.541225	0.982627	0.00759311		3246.63	0.531851	0.990975	0.00267354
960.064	0.25144	0.994788	9.19571e-05		908.763	0.241245	0.994947	0.000264727		3363.89	0.540636	0.983045	0.00689934		3242.97	0.53125	0.991739	0.00151994
956.4	0.25048	0.995048	0.000305698		905.098	0.240272	0.994866	0.000126409		3360.22	0.540047	0.982442	0.00825225		3239.3	0.530649	0.991874	0.0014422
952.735	0.24952	0.994967	7.01227e-05		901.434	0.2393	0.994785	7.01099e-05		3356.56	0.539458	0.982962	0.00800226		3235.64	0.530048	0.992127	0.00147945
949.071	0.248561	0.994765	0.000105168		897.77	0.238327	0.994846	9.27556e-05		3352.89	0.538869	0.981989	0.00913561		3231.97	0.529447	0.991982	0.0012072
945.406	0.247601	0.994907	7.04028e-05		894.105	0.237354	0.994785	3.5056e-05		3349.23	0.53828	0.982907	0.00837061		3228.31	0.528846	0.991799	0.0023594
941.742	0.246641	0.994886	0.000160668		890.441	0.236381	0.994927	7.01227e-05		3345.57	0.537691	0.9832	0.00907371		3224.64	0.528245	0.991267	0.00246926
938.078	0.245681	0.995089	0.000345339		886.777	0.235409	0.994805	0.000126401		3341.9	0.537102	0.983883	0.00916276		3220.98	0.527644	0.991696	0.00202747
934.413	0.244722	0.994886	6.07244e-05		883.112	0.234436	0.994886	0.000182173		3338.24	0.536514	0.984227	0.0088035		3217.31	0.527043	0.991651	0.00213873
930.749	0.243762	0.995251	0.000585907		879.448	0.233463	0.994785	9.27499e-05		3334.57	0.535925	0.98388	0.00866416		3213.65	0.526442	0.991311	0.00241832
927.085	0.242802	0.994846	0.000152816		875.784	0.23249	0.995068	0.000278337		3330.91	0.535336	0.983923	0.00962881		3209.99	0.525841	0.991415	0.00224606
923.42	0.241843	0.994825	6.07207e-05		872.119	0.231517	0.994987	0.00018554		3327.24	0.534747	0.984023	0.00872798		3206.32	0.52524	0.991224	0.00287708
919.756	0.240883	0.994967	0.000273848		868.455	0.230545	0.995028	0.000152844		3323.58	0.534158	0.98343	0.00852519		3202.66	0.524639	0.991726	0.00168446
916.092	0.239923	0.994947	0.000182184		864.79	0.229572	0.994967	0.000126415		3319.92	0.533569	0.983619	0.00806838		3198.99	0.524038	0.991958	0.00136475
912.427	0.238964	0.994866	7.01184e-05		861.126	0.228599	0.994886	0.000105181		3316.25	0.53298	0.984421	0.00684126		3195.33	0.523438	0.992111	0.0014047
908.763	0.238004	0.994947	0.000264727		857.462	0.227627	0.994886	6.07244e-05		3312.59	0.532391	0.985588	0.00572543		3191.66	0.522836	0.991696	0.00109532
905.098	0.237044	0.994866	0.000126409		853.797	0.226654	0.994866	9.27548e-05		3308.92	0.531802	0.985326	0.00605066		3188	0.522236	0.991436	0.000970416
901.434	0.236084	0.994785	7.01099e-05		850.133	0.225681	0.994906	0.000299577		3305.26	0.531213	0.985532	0.00586456		3184.34	0.521635	0.991667	0.00168187
897.77	0.235125	0.994846	9.27556e-05		846.469	0.224708	0.994765	0		3301.59	0.530624	0.98568	0.00555441		3180.67	0.521034	0.991556	0.00190218
894.105	0.234165	0.994785	3.5056e-05		842.804	0.223735	0.995227	0.000593992		3297.93	0.530035	0.985962	0.00517619		3177.01	0.520433	0.99166	0.00220252
890.441	0.233205	0.994927	7.01227e-05		839.14	0.222763	0.994785	9.27499e-05		3294.26	0.529446	0.986204	0.00541833		3173.34	0.519832	0.991842	0.00146393
886.777	0.232246	0.994805	0.000126401		835.475	0.22179	0.994906	0.000252835		3290.6	0.528857	0.98624	0.00558287		3169.68	0.519231	0.991967	0.00171798
883.112	0.231286	0.994886	0.000182173		831.811	0.220817	0.995008	0.0003156		3286.94	0.528268	0.985976	0.00594784		3166.01	0.51863	0.992293	0.00137002
879.448	0.230326	0.994785	9.27499e-05		828.147	0.219844	0.994785	9.27499e-05		3283.27	0.52768	0.985543	0.00673542		3162.35	0.518029	0.992186	0.000867506
875.784	0.229367	0.995068	0.000278337		824.482	0.218872	0.994615	0.000174795		3279.61	0.527091	0.985783	0.00599547		3158.68	0.517428	0.992339	0.000848161
872.119	0.228407	0.994987	0.00018554		820.818	0.217899	0.994492	0.000344193		3275.94	0.526502	0.986324	0.00509426		3155.02	0.516827	0.992636	0.000172692
868.455	0.227447	0.995028	0.000152844		817.154	0.216926	0.994591	0.000524907		3272.28	0.525913	0.986138	0.00525625		3151.36	0.516226	0.992254	0.000395555
864.79	0.226487	0.994967	0.000126415		813.489	0.215953	0.994568	0.000563927		3268.61	0.525324	0.986989	0.00408294		3147.69	0.515625	0.992253	0.000693012
861.126	0.225528	0.994886	0.000105181		809.825	0.214981	0.994607	0.000278948		3264.95	0.524735	0.986506	0.00452338		3144.03	0.515024	0.992345	0.000405147
857.462	0.224568	0.994886	6.07244e-05		806.161	0.214008	0.994525	0.000524544		3261.29	0.524146	0.987267	0.00359469		3140.36	0.514423	0.991735	0.000417745
853.797	0.223608	0.994866	9.27548e-05		802.496	0.213035	0.994497	0.0004627		3257.62	0.523557	0.986932	0.00468653		3136.7	0.513822	0.992322	0.000829712
850.133	0.222649	0.994906	0.000299577		798.832	0.212062	0.994607	0.000484085		3253.96	0.522968	0.986731	0.00423063		3133.03	0.513221	0.992481	0.000882929
846.469	0.221689	0.994765	0		795.167	0.211089	0.994738	0.000380875		3250.29	0.522379	0.987023	0.00488977		3129.37	0.51262	0.992501	0.00113358
842.804	0.220729	0.995227	0.000593992		791.503	0.210117	0.994892	0.000100525		3246.63	0.52179	0.98639	0.00432907		3125.7	0.512019	0.992196	0.00107975
839.14	0.21977	0.994785	9.27499e-05		787.839	0.209144	0.994805	0.000126401		3242.96	0.521201	0.98683	0.00414533		3122.04	0.511418	0.992183	0.00115712
835.475	0.21881	0.994906	0.000252835		784.174	0.208171	0.994866	0.000152814		3239.3	0.520613	0.986357	0.00317931		3118.38	0.510817	0.991746	0.00152664
831.811	0.21785	0.995008	0.0003156		780.51	0.207198	0.994777	4.35994e-05		3235.63	0.520023	0.986307	0.00324314		3114.71	0.510216	0.992063	0.00214816
828.147	0.216891	0.994785	9.27499e-05		776.846	0.206226	0.994825	6.07207e-05		3231.97	0.519435	0.986116	0.00193677		3111.05	0.509615	0.991125	0.00256771
824.482	0.215931	0.994615	0.000174795		773.181	0.205253	0.994835	0.000202722		3228.31	0.518846	0.986569	0.00156753		3107.38	0.509014	0.990923	0.00305713
820.818	0.214971	0.994492	0.000344193		769.517	0.20428	0.994953	0.000149665		3224.64	0.518257	0.985624	0.0025279		3103.72	0.508413	0.990209	0.00331903
817.154	0.214012	0.994591	0.000524907		765.853	0.203308	0.994712	0.000291058		3220.98	0.517668	0.985738	0.0030209		3100.05	0.507812	0.989872	0.00428483
813.489	0.213052	0.994568	0.000563927		762.188	0.202335	0.994705	0.000102447		3217.31	0.517079	0.986387	0.00327401		3096.39	0.507212	0.990062	0.00482672
809.825	0.212092	0.994607	0.000278948		758.524	0.201362	0.994846	0.000126399		3213.65	0.51649	0.986056	0.00444622		3092.73	0.50661	0.990454	0.00375602
806.161	0.211133	0.994525	0.000524544		754.859	0.200389	0.995028	7.0127e-05		3209.99	0.515901	0.985046	0.00480136		3089.06	0.50601	0.990953	0.00302202
802.496	0.210173	0.994497	0.0004627		751.195	0.199416	0.994848	8.96683e-05		3206.32	0.515312	0.984702	0.0047986		3085.4	0.505409	0.990579	0.00332445
798.832	0.209213	0.994607	0.000484085		747.531	0.198444	0.994785	0.000126392		3202.66	0.514723	0.985407	0.00466623		3081.73	0.504808	0.99063	0.00332515
795.167	0.208253	0.994738	0.000380875		743.866	0.197471	0.994765	6.0717e-05		3198.99	0.514134	0.98421	0.00557457		3078.07	0.504207	0.990849	0.0032965
791.503	0.207294	0.994892	0.000100525		740.202	0.196498	0.994715	8.56704e-05		3195.33	0.513545	0.983739	0.00601513		3074.4	0.503606	0.990389	0.00342333
787.839	0.206334	0.994805	0.000126401		736.538	0.195525	0.994774	4.79399e-05		3191.66	0.512956	0.982826	0.00658042		3070.74	0.503005	0.990847	0.00274972
784.174	0.205374	0.994866	0.000152814		732.873	0.194552	0.995196	0.00099801		3188	0.512368	0.983226	0.00566166		3067.07	0.502404	0.990714	0.00205713
780.51	0.204415	0.994777	4.35994e-05		729.209	0.19358	0.994637	0.000332244		3184.33	0.511779	0.982426	0.00630406		3063.41	0.501803	0.990822	0.00128493
776.846	0.203455	0.994825	6.07207e-05		725.544	0.192607	0.994785	9.27499e-05		3180.67	0.51119	0.983284	0.0058214		3059.75	0.501202	0.991235	0.000897758
773.181	0.202495	0.994835	0.000202722		721.88	0.191634	0.994765	0		3177.01	0.510601	0.984086	0.00552857		3056.08	0.500601	0.991368	0.00016037
769.517	0.201536	0.994953	0.000149665		718.216	0.190662	0.994866	9.27548e-05		3173.34	0.510012	0.985151	0.00530678		3052.42	0.5	0.991613	0.0001031
765.853	0.200576	0.994712	0.000291058		714.551	0.189689	0.994622	0.00031293		3169.68	0.509423	0.984079	0.00576008		3048.75	0.499399	0.991624	0.000154788
762.188	0.199616	0.994705	0.000102447		710.887	0.188716	0.993804	0.00166461		3166.01	0.508834	0.984649	0.00495195		3045.09	0.498798	0.991648	3.18807e-05
758.524	0.198657	0.994846	0.000126399		707.223	0.187743	0.993854	0.00173694		3162.35	0.508245	0.984762	0.00529851		3041.43	0.498197	0.991662	0.000301606
754.859	0.197697	0.995028	7.0127e-05		703.558	0.18677	0.993992	0.00222067		3158.68	0.507656	0.984559	0.00419701		3037.76	0.497596	0.991277	0.000112593
751.195	0.196737	0.994848	8.96683e-05		699.894	0.185798	0.993859	0.00172745		3155.02	0.507067	0.98431	0.00407477		3034.1	0.496995	0.991715	0.000195936
747.531	0.195777	0.994785	0.000126392		696.23	0.184825	0.994158	0.00180287		3151.36	0.506478	0.983723	0.00365772		3030.43	0.496394	0.991667	0.000368519
743.866	0.194818	0.994765	6.0717e-05		692.565	0.183852	0.994153	0.00133057		3147.69	0.505889	0.984005	0.00249057		3026.77	0.495793	0.991869	0.000185559
740.202	0.193858	0.994715	8.56704e-05		688.901	0.182879	0.994034	0.00121277		3144.03	0.5053	0.984005	0.00234131		3023.1	0.495192	0.991953	0.000385074
736.538	0.192898	0.994774	4.79399e-05		685.236	0.181907	0.99391	0.00153254		3140.36	0.504711	0.984398	0.00352471		3019.44	0.494591	0.991858	0.000837328
732.873	0.191939	0.995196	0.00099801		681.572	0.180934	0.993734	0.00173276		3136.7	0.504122	0.98573	0.00351489		3015.77	0.49399	0.992004	0.000895805
729.209	0.190979	0.994637	0.000332244		677.908	0.179961	0.994018	0.00124094		3133.03	0.503534	0.985585	0.00392074		3012.11	0.493389	0.99182	0.000726437
725.544	0.190019	0.994785	9.27499e-05		674.243	0.178988	0.994126	0.00147502		3129.37	0.502945	0.985258	0.00370318		3008.45	0.492788	0.992229	0.00117411
721.88	0.189059	0.994765	0		670.579	0.178016	0.993926	0.00172167		3125.7	0.502356	0.985068	0.00388865		3004.78	0.492188	0.991823	0.000737708
718.216	0.1881	0.994866	9.27548e-05		666.915	0.177043	0.994159	0.00141786		3122.04	0.501767	0.984816	0.00464064		3001.12	0.491586	0.992277	0.000889973
714.551	0.18714	0.994622	0.00031293		663.25	0.17607	0.994034	0.00142577		3118.38	0.501178	0.984133	0.00525477		2997.45	0.490986	0.991825	0.000581803
710.887	0.18618	0.993804	0.00166461		659.586	0.175097	0.993923	0.00145714		3114.71	0.500589	0.984176	0.00586712		2993.79	0.490385	0.991343	0.00031499
707.223	0.185221	0.993854	0.00173694		655.922	0.174125	0.994272	0.00106441		3111.05	0.5	0.984655	0.00596448		2990.12	0.489784	0.991647	0.000552633
703.558	0.184261	0.993992	0.00222067		652.257	0.173152	0.994352	0.000767044		3107.38	0.499411	0.98448	0.00569206		2986.46	0.489183	0.991456	8.63314e-05
699.894	0.183301	0.993859	0.00172745		648.593	0.172179	0.994255	0.000990021		3103.72	0.498822	0.984713	0.00627756		2982.8	0.488582	0.991909	0.000622135
696.23	0.182342	0.994158	0.00180287		644.928	0.171206	0.994733	0.000534223		3100.05	0.498233	0.985246	0.00546227		2979.13	0.487981	0.991983	0.00066715
692.565	0.181382	0.994153	0.00133057		641.264	0.170233	0.994168	0.00119442		3096.39	0.497644	0.983694	0.0068086		2975.47	0.48738	0.992123	0.00053984
688.901	0.180422	0.994034	0.00121277		637.6	0.169261	0.994204	0.00102331		3092.72	0.497055	0.984046	0.00655038		2971.8	0.486779	0.992117	0.00118912
685.236	0.179462	0.99391	0.00153254		633.935	0.168288	0.994165	0.00109458		3089.06	0.496466	0.984163	0.00617989		2968.14	0.486178	0.991361	0.00183072
681.572	0.178503	0.993734	0.00173276		630.271	0.167315	0.994142	0.00124004		3085.4	0.495877	0.984202	0.00603493		2964.47	0.485577	0.991328	0.00167257
677.908	0.177543	0.994018	0.00124094		626.607	0.166343	0.994174	0.00123452		3081.73	0.495289	0.984308	0.00605253		2960.81	0.484976	0.990948	0.001992
674.243	0.176583	0.994126	0.00147502		622.942	0.16537	0.993848	0.00169276		3078.07	0.4947	0.984274	0.00536632		2957.14	0.484375	0.990749	0.00200706
670.579	0.175624	0.993926	0.00172167		619.278	0.164397	0.993815	0.0016447		3074.4	0.494111	0.983584	0.00636709		2953.48	0.483774	0.99054	0.00211206
666.915	0.174664	0.994159	0.00141786		615.614	0.163424	0.993684	0.00187484		3070.74	0.493522	0.983252	0.00492632		2949.82	0.483173	0.990668	0.00176474
663.25	0.173704	0.994034	0.00142577		611.949	0.162451	0.993739	0.00193386		3067.07	0.492933	0.983305	0.00586427		2946.15	0.482572	0.99066	0.00116576
659.586	0.172745	0.993923	0.00145714		608.285	0.161479	0.993913	0.00158059		3063.41	0.492344	0.982627	0.00613671		2942.49	0.481971	0.990868	0.0011953
655.922	0.171785	0.994272	0.00106441		604.62	0.160506	0.994292	0.000925646		3059.75	0.491755	0.981952	0.00625071		2938.82	0.48137	0.991192	0.0018589
652.257	0.170825	0.994352	0.000767044		600.956	0.159533	0.994375	0.00147966		3056.08	0.491166	0.983088	0.00490122		2935.16	0.480769	0.990693	0.00177933
648.593	0.169866	0.994255	0.000990021		597.292	0.15856	0.994372	0.000997407		3052.42	0.490577	0.983662	0.00451635		2931.49	0.480168	0.990958	0.00270536
644.928	0.168906	0.994733	0.000534223		593.627	0.157587	0.994497	0.000307427		3048.75	0.489988	0.983068	0.00396486		2927.83	0.479567	0.990863	0.00251404
641.264	0.167946	0.994168	0.00119442		589.963	0.156615	0.994601	0.000290205		3045.09	0.489399	0.983041	0.00344299		2924.16	0.478966	0.991215	0.00162122
637.6	0.166987	0.994204	0.00102331		586.299	0.155642	0.995159	0.000659781		3041.42	0.48881	0.983672	0.00323051		2920.5	0.478365	0.991364	0.00205175
633.935	0.166027	0.994165	0.00109458		582.634	0.154669	0.994785	9.27499e-05		3037.76	0.488221	0.983805	0.00310695		2916.84	0.477764	0.991402	0.001704
630.271	0.165067	0.994142	0.00124004		578.97	0.153697	0.994785	9.27499e-05		3034.09	0.487632	0.983856	0.00300475		2913.17	0.477163	0.99153	0.00155581
626.607	0.164108	0.994174	0.00123452		575.305	0.152724	0.994704	0		3030.43	0.487044	0.983426	0.00358975		2909.51	0.476562	0.991565	0.00136858
622.942	0.163148	0.993848	0.00169276		571.641	0.151751	0.994866	0.000229908		3026.77	0.486455	0.982107	0.00432874		2905.84	0.475962	0.991628	0.00154373
619.278	0.162188	0.993815	0.0016447		567.977	0.150778	0.994921	0.00012951		3023.1	0.485866	0.982476	0.00435715		2902.18	0.475361	0.991171	0.000878362
615.614	0.161229	0.993684	0.00187484		564.312	0.149805	0.994817	0.000229812		3019.44	0.485277	0.982383	0.00396665		2898.51	0.47476	0.991413	0.00130349
611.949	0.160269	0.993739	0.00193386		560.648	0.148833	0.994601	0.000290482		3015.77	0.484688	0.983496	0.00311883		2894.85	0.474159	0.991322	0.00149362
608.285	0.159309	0.993913	0.00158059		556.984	0.14786	0.994871	0.000183921		3012.11	0.484099	0.982837	0.00434934		2891.19	0.473558	0.991552	0.00135355
604.62	0.158349	0.994292	0.000925646		553.319	0.146887	0.994785	7.01099e-05		3008.45	0.48351	0.9826	0.00420329		2887.52	0.472957	0.990792	0.000994322
600.956	0.15739	0.994375	0.00147966		549.655	0.145914	0.994827	0.000182199		3004.78	0.482921	0.982962	0.00405766		2883.86	0.472356	0.990709	0.00125771
597.292	0.15643	0.994372	0.000997407		545.991	0.144942	0.994834	6.25277e-05		3001.12	0.482332	0.983083	0.00416474		2880.19	0.471755	0.990965	0.00139537
593.627	0.15547	0.994497	0.000307427		542.326	0.143969	0.994791	0.000386604		2997.45	0.481743	0.982931	0.00425388		2876.53	0.471154	0.991292	0.00143672
589.963	0.154511	0.994601	0.000290205		538.662	0.142996	0.994618	0.000518039		2993.79	0.481154	0.983664	0.00486532		2872.86	0.470553	0.99125	0.00194124
586.299	0.153551	0.995159	0.000659781		534.997	0.142023	0.994186	0.000950625		2990.12	0.480565	0.983762	0.00513631		2869.2	0.469952	0.991219	0.00174827
582.634	0.152591	0.994785	9.27499e-05		531.333	0.141051	0.994217	0.00138988		2986.46	0.479976	0.984002	0.00446554		2865.53	0.469351	0.991091	0.00242895
578.97	0.151632	0.994785	9.27499e-05		527.669	0.140078	0.993957	0.00160993		2982.79	0.479387	0.982581	0.00385456		2861.87	0.46875	0.990836	0.00223141
575.305	0.150672	0.994704	0		524.004	0.139105	0.993924	0.00150943		2979.13	0.478799	0.982372	0.00514081		2858.21	0.468149	0.990516	0.00302041
571.641	0.149712	0.994866	0.000229908		520.34	0.138132	0.993861	0.00188492		2975.47	0.47821	0.98245	0.00522218		2854.54	0.467548	0.990883	0.00231365
567.977	0.148752	0.994921	0.00012951		516.676	0.13716	0.993777	0.00197424		2971.8	0.477621	0.982794	0.00566922		2850.88	0.466947	0.991265	0.00172594
564.312	0.147793	0.994817	0.000229812		513.011	0.136187	0.993596	0.00245151		2968.14	0.477032	0.982045	0.00646688		2847.21	0.466346	0.991172	0.00137318
560.648	0.146833	0.994601	0.000290482		509.347	0.135214	0.993732	0.0020624		2964.47	0.476443	0.982245	0.00753247		2843.55	0.465745	0.991484	0.00107746
556.984	0.145873	0.994871	0.000183921		505.683	0.134241	0.993654	0.00197578		2960.81	0.475854	0.982253	0.00713865		2839.88	0.465144	0.991677	0.000977988
553.319	0.144914	0.994785	7.01099e-05		502.018	0.133268	0.994045	0.00156663		2957.14	0.475265	0.982319	0.00662699		2836.22	0.464543	0.992183	0.00117969
549.655	0.143954	0.994827	0.000182199		498.354	0.132296	0.994378	0.000882367		2953.48	0.474676	0.983154	0.0056163		2832.56	0.463942	0.992342	0.00102495
545.991	0.142994	0.994834	6.25277e-05		494.689	0.131323	0.994459	0.000902747		2949.82	0.474087	0.983497	0.004834		2828.89	0.463341	0.9926	0.000634374
542.326	0.142035	0.994791	0.000386604		491.025	0.13035	0.994366	0.000638085		2946.15	0.473498	0.983805	0.00431589		2825.23	0.46274	0.991731	0.000370401
538.662	0.141075	0.994618	0.000518039		487.361	0.129378	0.994345	0.000840537		2942.49	0.472909	0.98353	0.00442502		2821.56	0.462139	0.992521	0.00118243
534.997	0.140115	0.994186	0.000950625		483.696	0.128405	0.994184	0.00137449		2938.82	0.47232	0.983367	0.00436559		2817.9	0.461538	0.992339	0.000892126
531.333	0.139155	0.994217	0.00138988		480.032	0.127432	0.994153	0.00111276		2935.16	0.471731	0.983623	0.00398054		2814.23	0.460937	0.992319	0.000999513
527.669	0.138196	0.993957	0.00160993		476.368	0.126459	0.994313	0.000993445		2931.49	0.471143	0.984267	0.00375822		2810.57	0.460336	0.992481	0.00106028
524.004	0.137236	0.993924	0.00150943		472.703	0.125486	0.994441	0.000772613		2927.83	0.470554	0.984773	0.0044061		2806.91	0.459736	0.992541	0.001091
520.34	0.136276	0.993861	0.00188492		469.039	0.124514	0.994403	0.000575249		2924.16	0.469965	0.985326	0.00413523		2803.24	0.459135	0.992161	0.000824879
516.676	0.135317	0.993777	0.00197424		465.375	0.123541	0.994593	0.000740314		2920.5	0.469376	0.984635	0.00515938		2799.58	0.458534	0.992441	0.00142632
513.011	0.134357	0.993596	0.00245151		461.71	0.122568	0.994579	0.000586091		2916.84	0.468787	0.984617	0.00534251		2795.91	0.457933	0.992468	0.00102379
509.347	0.133397	0.993732	0.0020624		458.046	0.121595	0.994366	0.0011521		2913.17	0.468198	0.98434	0.00586909		2792.25	0.457332	0.991052	0.00149321
505.683	0.132438	0.993654	0.00197578		454.381	0.120622	0.993978	0.00141817		2909.51	0.467609	0.984497	0.0059846		2788.58	0.456731	0.991144	0.00136177
502.018	0.131478	0.994045	0.00156663		450.717	0.11965	0.993928	0.00155626		2905.84	0.46702	0.985296	0.00515197		2784.92	0.45613	0.991742	0.000570908
498.354	0.130518	0.994378	0.000882367		447.053	0.118677	0.994162	0.00164484		2902.18	0.466431	0.985055	0.0051701		2781.26	0.455529	0.991604	0.00102555
494.689	0.129558	0.994459	0.000902747		443.388	0.117704	0.994156	0.00178197		2898.51	0.465842	0.984895	0.00523934		2777.59	0.454928	0.991856	0.00120408
491.025	0.128599	0.994366	0.000638085		439.724	0.116732	0.993906	0.00149223		2894.85	0.465253	0.984661	0.00497713		2773.93	0.454327	0.991402	0.00111071
487.361	0.127639	0.994345	0.000840537		436.06	0.115759	0.993751	0.00186055		2891.18	0.464664	0.984388	0.00441605		2770.26	0.453726	0.991232	0.00114651
483.696	0.126679	0.994184	0.00137449		432.395	0.114786	0.993913	0.00158058		2887.52	0.464075	0.985338	0.00361915		2766.6	0.453125	0.991366	0.00153507
480.032	0.12572	0.994153	0.00111276		428.731	0.113813	0.993907	0.00185995		2883.86	0.463486	0.985488	0.00228643		2762.93	0.452524	0.991401	0.00147412
476.368	0.12476	0.994313	0.000993445		425.066	0.11284	0.993935	0.00175421		2880.19	0.462898	0.986106	0.00314276		2759.27	0.451923	0.9915	0.00123984
472.703	0.1238	0.994441	0.000772613		421.402	0.111868	0.993731	0.00184303		2876.53	0.462309	0.987056	0.00375493		2755.6	0.451322	0.991568	0.00115782
469.039	0.122841	0.994403	0.000575249		417.738	0.110895	0.993571	0.00206766		2872.86	0.46172	0.988063	0.00443863		2751.94	0.450721	0.991528	0.000984151
465.375	0.121881	0.994593	0.000740314		414.073	0.109922	0.993643	0.00194388		2869.2	0.461131	0.988161	0.00477354		2748.28	0.45012	0.991586	0.000889309
461.71	0.120921	0.994579	0.000586091		410.409	0.108949	0.993303	0.00269387		2865.53	0.460542	0.988807	0.00452264		2744.61	0.449519	0.991485	0.00146288
458.046	0.119962	0.994366	0.0011521		406.745	0.107977	0.993447	0.0023406		2861.87	0.459953	0.990321	0.00303736		2740.95	0.448918	0.991382	0.00106299
454.381	0.119002	0.993978	0.00141817		403.08	0.107004	0.993536	0.002445		2858.21	0.459364	0.990569	0.00232636		2737.28	0.448317	0.991341	0.00111153
450.717	0.118042	0.993928	0.00155626		399.416	0.106031	0.993816	0.00206808		2854.54	0.458775	0.991255	0.00144756		2733.62	0.447716	0.991934	0.000865953
447.053	0.117083	0.994162	0.00164484		395.752	0.105058	0.993736	0.00199258		2850.88	0.458186	0.991258	0.000875621		2729.95	0.447115	0.992314	0.00116241
443.388	0.116123	0.994156	0.00178197		392.087	0.104086	0.993673	0.00225867		2847.21	0.457597	0.991461	0.000737071		2726.29	0.446514	0.991942	0.000783837
439.724	0.115163	0.993906	0.00149223		388.423	0.103113	0.994385	0.00133936		2843.55	0.457008	0.991173	0.000539795		2722.62	0.445913	0.992152	0.000844027
436.06	0.114204	0.993751	0.00186055		384.758	0.10214	0.993891	0.0016709		2839.88	0.456419	0.99098	0.000959487		2718.96	0.445312	0.992363	0.000702889
432.395	0.113244	0.993913	0.00158058		381.094	0.101167	0.993976	0.00168141		2836.22	0.45583	0.989939	0.000578781		2715.3	0.444712	0.992188	0.00108783
428.731	0.112284	0.993907	0.00185995		377.43	0.100195	0.993907	0.00169984		2832.55	0.455241	0.989677	0.000981649		2711.63	0.444111	0.992297	0.00132103
425.066	0.111324	0.993935	0.00175421		373.765	0.0992217	0.993906	0.00175289		2828.89	0.454653	0.988042	0.00170735		2707.97	0.44351	0.992116	0.00127111
421.402	0.110365	0.993731	0.00184303		370.101	0.098249	0.993989	0.00214298		2825.23	0.454064	0.987963	0.00172752		2704.3	0.442909	0.991896	0.00108968
417.738	0.109405	0.993571	0.00206766		366.437	0.0972764	0.993729	0.00189945		2821.56	0.453475	0.988001	0.000856177		2700.64	0.442308	0.991705	0.000865524
414.073	0.108445	0.993643	0.00194388		362.772	0.0963034	0.993456	0.00232019		2817.9	0.452886	0.987762	0.00196392		2696.97	0.441707	0.991304	0.00126778
410.409	0.107486	0.993303	0.00269387		359.108	0.0953308	0.99398	0.00210335		2814.23	0.452297	0.987038	0.00393813		2693.31	0.441106	0.991506	0.000997759
406.745	0.106526	0.993447	0.0023406		355.444	0.0943581	0.993574	0.0021156		2810.57	0.451708	0.987771	0.00297525		2689.64	0.440505	0.991087	0.00151645
403.08	0.105566	0.993536	0.002445		351.779	0.0933852	0.993722	0.00185864		2806.9	0.451119	0.988129	0.00244994		2685.98	0.439904	0.990812	0.00181177
399.416	0.104607	0.993816	0.00206808		348.115	0.0924125	0.993416	0.00249391		2803.24	0.45053	0.988431	0.00158807		2682.32	0.439303	0.990434	0.0023517
395.752	0.103647	0.993736	0.00199258		344.45	0.0914396	0.993205	0.00281184		2799.58	0.449941	0.988227	0.00216883		2678.65	0.438702	0.990455	0.00289236
392.087	0.102687	0.993673	0.00225867		340.786	0.0904669	0.993132	0.00303929		2795.91	0.449352	0.988504	0.00259153		2674.99	0.438101	0.990275	0.0023485
388.423	0.101728	0.994385	0.00133936		337.122	0.0894943	0.993032	0.00310639		2792.25	0.448763	0.988421	0.00196443		2671.32	0.4375	0.990727	0.00245598
384.758	0.100768	0.993891	0.0016709		333.457	0.0885213	0.993367	0.00279075		2788.58	0.448174	0.98836	0.00185299		2667.66	0.436899	0.990944	0.00260877
381.094	0.0998081	0.993976	0.00168141		329.793	0.0875487	0.993652	0.00240932		2784.92	0.447585	0.988458	0.00186295		2663.99	0.436298	0.991479	0.00255482
377.43	0.0988485	0.993907	0.00169984		326.129	0.086576	0.993587	0.00209867		2781.25	0.446996	0.988072	0.00200253		2660.33	0.435697	0.99252	0.00147013
373.765	0.0978886	0.993906	0.00175289		322.464	0.0856031	0.993737	0.00183207		2777.59	0.446408	0.98726	0.00115507		2656.67	0.435096	0.992235	0.00159884
370.101	0.096929	0.993989	0.00214298		318.8	0.0846304	0.993743	0.00177025		2773.93	0.445819	0.986732	0.000841299		2653	0.434495	0.992313	0.00133713
366.437	0.0959694	0.993729	0.00189945		315.136	0.0836577	0.994208	0.00159498		2770.26	0.44523	0.986698	0.00129238		2649.34	0.433894	0.992461	0.00115593
362.772	0.0950095	0.993456	0.00232019		311.471	0.0826848	0.993956	0.00156126		2766.6	0.444641	0.986437	0.00119669		2645.67	0.433293	0.992008	0.00116131
359.108	0.0940499	0.99398	0.00210335		307.807	0.0817121	0.994367	0.00134167		2762.93	0.444052	0.985564	0.002629		2642.01	0.432692	0.991692	0.00151608
355.444	0.0930904	0.993574	0.0021156		304.142	0.0807392	0.994306	0.000797104		2759.27	0.443463	0.984942	0.00363199		2638.34	0.432091	0.991429	0.00145592
351.779	0.0921305	0.993722	0.00185864		300.478	0.0797665	0.994264	0.000980489		2755.6	0.442874	0.985313	0.00398541		2634.68	0.43149	0.991291	0.00165165
348.115	0.0911709	0.993416	0.00249391		296.814	0.0787939	0.994322	0.000874693		2751.94	0.442285	0.984628	0.00405776		2631.02	0.430889	0.990944	0.0020701
344.45	0.090211	0.993205	0.00281184		293.149	0.0778209	0.994234	0.00107744		2748.28	0.441696	0.984779	0.00456761		2627.35	0.430288	0.990916	0.00190692
340.786	0.0892514	0.993132	0.00303929		289.485	0.0768483	0.994097	0.00115671		2744.61	0.441107	0.984095	0.00439296		2623.69	0.429687	0.991057	0.00234794
337.122	0.0882918	0.993032	0.00310639		285.821	0.0758756	0.993639	0.00195004		2740.95	0.440518	0.984596	0.00267961		2620.02	0.429087	0.991181	0.00201258
333.457	0.087332	0.993367	0.00279075		282.156	0.0749027	0.992978	0.00314889		2737.28	0.439929	0.984302	0.00211408		2616.36	0.428486	0.991398	0.00134692
329.793	0.0863724	0.993652	0.00240932		278.492	0.07393	0.992987	0.0032891		2733.62	0.43934	0.983295	0.00220144		2612.69	0.427885	0.991649	0.00124173
326.129	0.0854128	0.993587	0.00209867		274.827	0.0729571	0.993226	0.00271823		2729.95	0.438751	0.983079	0.00218619		2609.03	0.427284	0.991813	0.0011834
322.464	0.0844529	0.993737	0.00183207		271.163	0.0719844	0.993274	0.00289717		2726.29	0.438162	0.98479	0.00284877		2605.36	0.426683	0.991223	0.00199946
318.8	0.0834933	0.993743	0.00177025		267.499	0.0710118	0.993028	0.00311234		2722.62	0.437574	0.984323	0.00348384		2601.7	0.426082	0.99049	0.00285519
315.136	0.0825337	0.994208	0.00159498		263.834	0.0700388	0.993125	0.00310332		2718.96	0.436985	0.984743	0.00241533		2598.04	0.425481	0.989601	0.00384081
311.471	0.0815739	0.993956	0.00156126		260.17	0.0690662	0.99229	0.00439193		2715.3	0.436396	0.98599	0.00235157		2594.37	0.42488	0.989562	0.00350713
307.807	0.0806143	0.994367	0.00134167		256.506	0.0680935	0.992164	0.0053992		2711.63	0.435807	0.986241	0.00233769		2590.71	0.424279	0.98992	0.00302315
304.142	0.0796544	0.994306	0.000797104		252.841	0.0671206	0.992416	0.00433253		2707.97	0.435218	0.986707	0.002802		2587.04	0.423678	0.990725	0.00228535
300.478	0.0786948	0.994264	0.000980489		249.177	0.0661479	0.992792	0.00373194		2704.3	0.434629	0.98583	0.00271328		2583.38	0.423077	0.991297	0.00234887
296.814	0.0777352	0.994322	0.000874693		245.513	0.0651752	0.992806	0.00365616		2700.64	0.43404	0.986333	0.00249672		2579.71	0.422476	0.991295	0.00158342
293.149	0.0767754	0.994234	0.00107744		241.848	0.0642023	0.992639	0.00405613		2696.97	0.433451	0.985851	0.00369164		2576.05	0.421875	0.991688	0.00120127
289.485	0.0758158	0.994097	0.00115671		238.184	0.0632296	0.992512	0.00400757		2693.31	0.432862	0.98586	0.00372165		2572.39	0.421274	0.991697	0.00144982
285.821	0.0748562	0.993639	0.00195004		234.519	0.0622567	0.99291	0.00331735		2689.64	0.432273	0.985366	0.0038869		2568.72	0.420673	0.991992	0.00115308
282.156	0.0738963	0.992978	0.00314889		230.855	0.061284	0.992929	0.0033905		2685.98	0.431684	0.986306	0.00349094		2565.06	0.420072	0.991876	0.00100631
278.492	0.0729367	0.992987	0.0032891		227.191	0.0603114	0.993109	0.00276261		2682.32	0.431095	0.987527	0.0023286		2561.39	0.419471	0.992337	0.000847985
274.827	0.0719769	0.993226	0.00271823		223.526	0.0593384	0.993152	0.00284787		2678.65	0.430507	0.987624	0.00280228		2557.73	0.41887	0.992468	0.00147268
271.163	0.0710173	0.993274	0.00289717		219.862	0.0583658	0.993262	0.00303235		2674.99	0.429917	0.987479	0.0024064		2554.06	0.418269	0.992203	0.00105553
267.499	0.0700577	0.993028	0.00311234		216.198	0.0573931	0.99285	0.00331762		2671.32	0.429329	0.987567	0.00258487		2550.4	0.417668	0.992167	0.00107379
263.834	0.0690978	0.993125	0.00310332		212.533	0.0564202	0.992681	0.00403693		2667.66	0.42874	0.987772	0.00265278		2546.74	0.417067	0.992266	0.00112842
260.17	0.0681382	0.99229	0.00439193		208.869	0.0554475	0.992432	0.00393437		2663.99	0.428151	0.987344	0.00349893		2543.07	0.416466	0.992207	0.000911147
256.506	0.0671786	0.992164	0.0053992		205.205	0.0544748	0.992757	0.00363655		2660.33	0.427562	0.98741	0.00384467		2539.41	0.415865	0.992178	0.00171868
252.841	0.0662187	0.992416	0.00433253		201.54	0.0535019	0.992619	0.00371736		2656.66	0.426973	0.986823	0.00315758		2535.74	0.415264	0.991603	0.00190361
249.177	0.0652592	0.992792	0.00373194		197.876	0.0525292	0.992533	0.00397088		2653	0.426384	0.986633	0.00336107		2532.08	0.414663	0.991593	0.00142145
245.513	0.0642996	0.992806	0.00365616		194.211	0.0515563	0.992547	0.00405298		2649.34	0.425795	0.986247	0.00397184		2528.41	0.414063	0.991421	0.00163512
241.848	0.0633397	0.992639	0.00405613		190.547	0.0505837	0.992367	0.00431343		2645.67	0.425206	0.985583	0.00473398		2524.75	0.413461	0.99158	0.00180906
238.184	0.0623801	0.992512	0.00400757		186.883	0.049611	0.992194	0.00461153		2642.01	0.424617	0.985523	0.00459423		2521.08	0.412861	0.991035	0.00213139
234.519	0.0614202	0.99291	0.00331735		183.218	0.0486381	0.992066	0.00472736		2638.34	0.424028	0.986461	0.00314378		2517.42	0.41226	0.99155	0.0021755
230.855	0.0604606	0.992929	0.0033905		179.554	0.0476654	0.992711	0.00382061		2634.68	0.423439	0.986486	0.00309421		2513.76	0.411659	0.992019	0.00191968
227.191	0.059501	0.993109	0.00276261		175.89	0.0466927	0.993049	0.00323536		2631.01	0.42285	0.986557	0.0031508		2510.09	0.411058	0.992402	0.00162449
223.526	0.0585412	0.993152	0.00284787		172.225	0.0457198	0.99305	0.0032335		2627.35	0.422262	0.986029	0.00363459		2506.43	0.410457	0.992099	0.00188506
219.862	0.0575816	0.993262	0.00303235		168.561	0.0447471	0.993198	0.00281965		2623.69	0.421673	0.986168	0.00334922		2502.76	0.409856	0.992514	0.00127911
216.198	0.056622	0.99285	0.00331762		164.896	0.0437742	0.992601	0.00374729		2620.02	0.421084	0.985974	0.00305953		2499.1	0.409255	0.991948	0.00154989
212.533	0.0556621	0.992681	0.00403693		161.232	0.0428015	0.992402	0.00419808		2616.36	0.420495	0.986511	0.00303027		2495.43	0.408654	0.992	0.00146056
208.869	0.0547025	0.992432	0.00393437		157.568	0.0418289	0.991712	0.00544565		2612.69	0.419906	0.987112	0.0029276		2491.77	0.408053	0.992084	0.0012961
205.205	0.0537429	0.992757	0.00363655		153.903	0.0408559	0.991389	0.00584758		2609.03	0.419317	0.987078	0.00231552		2488.11	0.407452	0.991412	0.00167834
201.54	0.0527831	0.992619	0.00371736		150.239	0.0398833	0.990037	0.00845229		2605.36	0.418728	0.987071	0.0026253		2484.44	0.406851	0.991546	0.00149038
197.876	0.0518235	0.992533	0.00397088		146.575	0.0389106	0.990132	0.00797061		2601.7	0.418139	0.987818	0.00256337		2480.78	0.40625	0.991582	0.00165232
194.211	0.0508636	0.992547	0.00405298		142.91	0.0379377	0.990318	0.00817677		2598.04	0.41755	0.988383	0.00326633		2477.11	0.405649	0.991752	0.00180433
190.547	0.049904	0.992367	0.00431343		139.246	0.036965	0.989886	0.00855557		2594.37	0.416961	0.988114	0.0036924		2473.45	0.405048	0.992311	0.00103015
186.883	0.0489444	0.992194	0.00461153		135.582	0.0359923	0.989874	0.00862868		2590.71	0.416372	0.987762	0.00376453		2469.78	0.404447	0.992403	0.000855175
183.218	0.0479846	0.992066	0.00472736		131.917	0.0350194	0.990569	0.00742641		2587.04	0.415783	0.98851	0.00347191		2466.12	0.403846	0.992338	0.00126616
179.554	0.047025	0.992711	0.00382061		128.253	0.0340467	0.991539	0.00574515		2583.38	0.415194	0.988002	0.00361663		2462.45	0.403245	0.991578	0.00212439
175.89	0.0460654	0.993049	0.00323536		124.588	0.0330738	0.991773	0.00523444		2579.71	0.414605	0.987383	0.00368894		2458.79	0.402644	0.991526	0.00175041
172.225	0.0451055	0.99305	0.0032335		120.924	0.0321011	0.99219	0.00451316		2576.05	0.414016	0.987789	0.00321783		2455.13	0.402043	0.991633	0.00152409
168.561	0.0441459	0.993198	0.00281965		117.26	0.0311285	0.992463	0.00403986		2572.38	0.413428	0.987902	0.00270654		2451.46	0.401442	0.991419	0.00181234
164.896	0.0431861	0.992601	0.00374729		113.595	0.0301556	0.99247	0.00408164		2568.72	0.412839	0.987658	0.00265221		2447.8	0.400841	0.9919	0.00192965
161.232	0.0422265	0.992402	0.00419808		109.931	0.0291829	0.992151	0.00463226		2565.06	0.41225	0.98736	0.00259515		2444.13	0.40024	0.991299	0.00177187
157.568	0.0412669	0.991712	0.00544565		106.267	0.0282102	0.991363	0.00583905		2561.39	0.411661	0.98689	0.00199456		2440.47	0.399639	0.991359	0.00181858
153.903	0.040307	0.991389	0.00584758		102.602	0.0272373	0.99091	0.00678133		2557.73	0.411072	0.986559	0.00165118		2436.8	0.399038	0.991261	0.00180895
150.239	0.0393474	0.990037	0.00845229		98.938	0.0262646	0.990456	0.00762133		2554.06	0.410483	0.986637	0.00159077		2433.14	0.398437	0.991307	0.00178362
146.575	0.0383878	0.990132	0.00797061		95.274	0.025292	0.990481	0.00773673		2550.4	0.409894	0.986741	0.00234177		2429.47	0.397837	0.991303	0.00181793
142.91	0.037428	0.990318	0.00817677		91.609	0.024319	0.990225	0.00796881		2546.74	0.409305	0.986549	0.00190316		2425.81	0.397236	0.991339	0.00175931
139.246	0.0364684	0.989886	0.00855557		87.945	0.0233464	0.99133	0.00621234		2543.07	0.408716	0.986412	0.00145879		2422.15	0.396635	0.991227	0.00175494
135.582	0.0355088	0.989874	0.00862868		84.28	0.0223734	0.991349	0.00607383		2539.41	0.408127	0.985934	0.0015209		2418.48	0.396034	0.991994	0.0015555
131.917	0.0345489	0.990569	0.00742641		80.616	0.0214008	0.991224	0.00644913		2535.74	0.407538	0.986543	0.00151961		2414.82	0.395433	0.992702	0.00152391
128.253	0.0335893	0.991539	0.00574515		76.952	0.0204281	0.990585	0.00739688		2532.08	0.406949	0.985763	0.00123432		2411.15	0.394832	0.992511	0.00149212
124.588	0.0326294	0.991773	0.00523444		73.287	0.0194552	0.989712	0.00901411		2528.41	0.40636	0.986063	0.000627184		2407.49	0.394231	0.992477	0.00144153
120.924	0.0316698	0.99219	0.00451316		69.623	0.0184825	0.988656	0.0110552		2524.75	0.405771	0.98609	0.00105987		2403.82	0.39363	0.992522	0.00131095
117.26	0.0307103	0.992463	0.00403986		65.959	0.0175098	0.988767	0.010652		2521.08	0.405183	0.986389	0.00248645		2400.16	0.393029	0.992696	0.00125741
113.595	0.0297504	0.99247	0.00408164		62.294	0.0165369	0.989113	0.00989442		2517.42	0.404594	0.98779	0.00315392		2396.5	0.392428	0.99203	0.00112525
109.931	0.0287908	0.992151	0.00463226		58.63	0.0155642	0.988334	0.0111917		2513.76	0.404005	0.987603	0.00373997		2392.83	0.391827	0.992211	0.00126656
106.267	0.0278312	0.991363	0.00583905		54.966	0.0145916	0.988124	0.0117126		2510.09	0.403416	0.987307	0.00514295		2389.17	0.391226	0.992129	0.000917659
102.602	0.0268713	0.99091	0.00678133		51.301	0.0136186	0.987746	0.0122624		2506.43	0.402827	0.987373	0.00541216		2385.5	0.390625	0.992195	0.00100363
98.938	0.0259117	0.990456	0.00762133		47.637	0.012646	0.986865	0.0138404		2502.76	0.402238	0.987793	0.00515352		2381.84	0.390024	0.992164	0.00100169
95.274	0.0249521	0.990481	0.00773673		43.972	0.011673	0.986322	0.0145701		2499.1	0.401649	0.988105	0.00541194		2378.17	0.389423	0.99244	0.00124226
91.609	0.0239923	0.990225	0.00796881		40.308	0.0107004	0.987006	0.0139126		2495.43	0.40106	0.988359	0.00540965		2374.51	0.388822	0.992026	0.00134198
87.945	0.0230327	0.99133	0.00621234		36.644	0.00972772	0.9872	0.0133137		2491.77	0.400471	0.988286	0.00552316		2370.84	0.388221	0.991899	0.00152848
84.28	0.0220728	0.991349	0.00607383		32.979	0.00875479	0.986575	0.0144485		2488.11	0.399882	0.988535	0.0054161		2367.18	0.38762	0.991841	0.00190652
80.616	0.0211132	0.991224	0.00644913		29.315	0.00778212	0.985976	0.015591		2484.44	0.399293	0.98895	0.00500115		2363.52	0.387019	0.991446	0.00197849
76.952	0.0201536	0.990585	0.00739688		25.651	0.00680946	0.984759	0.017541		2480.78	0.398704	0.989174	0.00488985		2359.85	0.386418	0.992249	0.000984342
73.287	0.0191938	0.989712	0.00901411		21.986	0.00583652	0.983893	0.0189876		2477.11	0.398115	0.989102	0.00453847		2356.19	0.385817	0.992715	0.00153993
69.623	0.0182342	0.988656	0.0110552		18.322	0.00486386	0.982655	0.0211329		2473.45	0.397526	0.989205	0.00407708		2352.52	0.385216	0.991671	0.00163198
65.959	0.0172746	0.988767	0.010652		14.657	0.00389093	0.984036	0.0186347		2469.78	0.396938	0.988658	0.00466175		2348.86	0.384615	0.991083	0.00220707
62.294	0.0163147	0.989113	0.00989442		10.993	0.00291826	0.981893	0.0226119		2466.12	0.396349	0.989087	0.00476583		2345.2	0.384014	0.9915	0.00194756
58.63	0.0153551	0.988334	0.0111917		7.329	0.0019456	0.982032	0.0222648		2462.45	0.39576	0.989291	0.00434134		2341.53	0.383413	0.991054	0.0023791
54.966	0.0143955	0.988124	0.0117126		3.664	0.000972666	0.983251	0.0200475		2458.79	0.395171	0.989889	0.00353972		2337.87	0.382813	0.99078	0.00291253
51.301	0.0134357	0.987746	0.0122624		0	0	0.982022	0.0220182		2455.12	0.394582	0.990425	0.00293769		2334.2	0.382211	0.991639	0.00172182
47.637	0.0124761	0.986865	0.0138404							2451.46	0.393993	0.990393	0.00318309		2330.54	0.381611	0.991823	0.00152816
43.972	0.0115162	0.986322	0.0145701							2447.8	0.393404	0.990654	0.0025959		2326.87	0.38101	0.992194	0.000946091
40.308	0.0105566	0.987006	0.0139126							2444.13	0.392815	0.990889	0.00248137		2323.21	0.380409	0.992369	0.0009223
36.644	0.00959702	0.9872	0.0133137							2440.47	0.392226	0.990966	0.00191468		2319.54	0.379808	0.992522	0.00094037
32.979	0.00863716	0.986575	0.0144485							2436.8	0.391637	0.990845	0.00178274		2315.88	0.379207	0.992708	0.000976025
29.315	0.00767756	0.985976	0.015591							2433.14	0.391048	0.990779	0.00147759		2312.22	0.378606	0.992361	0.00115576
25.651	0.00671797	0.984759	0.017541							2429.47	0.390459	0.990475	0.00145299		2308.55	0.378005	0.992106	0.0012717
21.986	0.00575811	0.983893	0.0189876							2425.81	0.38987	0.990621	0.00134409		2304.89	0.377404	0.991619	0.00190372
18.322	0.00479851	0.982655	0.0211329							2422.15	0.389281	0.989961	0.001838		2301.22	0.376803	0.991176	0.00245194
14.657	0.00383865	0.984036	0.0186347							2418.48	0.388693	0.98916	0.00241546		2297.56	0.376202	0.991337	0.00233178
10.993	0.00287905	0.981893	0.0226119							2414.82	0.388104	0.989251	0.00221976		2293.89	0.375601	0.991496	0.00199578
7.329	0.00191946	0.982032	0.0222648							2411.15	0.387515	0.989892	0.00261525		2290.23	0.375	0.99165	0.00220369
3.664	0.000959597	0.983251	0.0200475							2407.49	0.386926	0.989664	0.00236864		2286.57	0.374399	0.991632	0.00162286
0	0	0.982022	0.0220182							2403.82	0.386337	0.989708	0.00295217		2282.9	0.373798	0.991899	0.00175186
										2400.16	0.385748	0.990412	0.00216174		2279.24	0.373197	0.991828	0.0015865
										2396.5	0.385159	0.990357	0.00296505		2275.57	0.372596	0.991886	0.00180036
										2392.83	0.38457	0.991019	0.00150294		2271.91	0.371995	0.991749	0.00168807
										2389.17	0.383981	0.991584	0.000383648		2268.24	0.371394	0.99188	0.00148324
										2385.5	0.383392	0.991795	0.000488238		2264.58	0.370793	0.991693	0.00166575
										2381.84	0.382803	0.992008	0.000873507		2260.91	0.370192	0.991866	0.00171728
										2378.17	0.382214	0.992358	0.00127112		2257.25	0.369591	0.992026	0.00186981
										2374.51	0.381625	0.992037	0.00126174		2253.59	0.36899	0.991976	0.00130238
										2370.84	0.381037	0.9917	0.00177141		2249.92	0.368389	0.992079	0.00177138
										2367.18	0.380448	0.99195	0.00158029		2246.26	0.367789	0.992329	0.00101127
										2363.52	0.379859	0.99213	0.00155472		2242.59	0.367187	0.992092	0.00140514
										2359.85	0.37927	0.991765	0.0017101		2238.93	0.366587	0.991828	0.00179701
										2356.19	0.378681	0.99161	0.00213084		2235.26	0.365986	0.99219	0.0013652
										2352.52	0.378092	0.99113	0.00293621		2231.6	0.365385	0.992429	0.00118376
										2348.86	0.377503	0.990601	0.0036891		2227.93	0.364784	0.992357	0.00103765
										2345.19	0.376914	0.990535	0.00329102		2224.27	0.364183	0.992158	0.00135315
										2341.53	0.376325	0.990592	0.00352165		2220.61	0.363582	0.991969	0.00153818
										2337.87	0.375736	0.990662	0.00342749		2216.94	0.362981	0.991809	0.00172152
										2334.2	0.375147	0.99151	0.00151814		2213.28	0.36238	0.991644	0.00173951
										2330.54	0.374558	0.99173	0.000162766		2209.61	0.361779	0.991448	0.00203438
										2326.87	0.373969	0.991536	0.0015723		2205.95	0.361178	0.9917	0.00245808
										2323.21	0.37338	0.991635	0.00213733		2202.28	0.360577	0.991305	0.00199267
										2319.54	0.372792	0.991221	0.00234875		2198.62	0.359976	0.991319	0.00224562
										2315.88	0.372203	0.991053	0.00249666		2194.96	0.359375	0.990571	0.00284215
										2312.22	0.371614	0.990978	0.00286876		2191.29	0.358774	0.990543	0.00308317
										2308.55	0.371025	0.990521	0.00333891		2187.63	0.358173	0.989889	0.00323908
										2304.89	0.370436	0.990403	0.00290271		2183.96	0.357572	0.989699	0.00359037
										2301.22	0.369847	0.990278	0.00248348		2180.3	0.356971	0.989931	0.00355292
										2297.56	0.369258	0.990259	0.00167702		2176.63	0.35637	0.990035	0.00470378
										2293.89	0.368669	0.990111	0.00117453		2172.97	0.355769	0.989531	0.0052442
										2290.23	0.36808	0.989775	0.00108123		2169.3	0.355168	0.989045	0.00466263
										2286.57	0.367491	0.989466	0.0011669		2165.64	0.354567	0.989132	0.00457507
										2282.9	0.366902	0.989017	0.00195325		2161.98	0.353966	0.989623	0.00361115
										2279.24	0.366313	0.988457	0.00232375		2158.31	0.353365	0.9895	0.00423113
										2275.57	0.365724	0.986807	0.00358851		2154.65	0.352764	0.990585	0.0036528
										2271.91	0.365135	0.987534	0.00286403		2150.98	0.352163	0.991045	0.00316834
										2268.24	0.364547	0.987793	0.00273832		2147.32	0.351563	0.991468	0.00322869
										2264.58	0.363958	0.988201	0.00346701		2143.66	0.350961	0.991763	0.00260914
										2260.91	0.363369	0.988668	0.00291875		2139.99	0.350361	0.992434	0.00267258
										2257.25	0.36278	0.989487	0.00297594		2136.33	0.34976	0.992675	0.00152814
										2253.59	0.362191	0.990145	0.00283565		2132.66	0.349159	0.992939	0.00148072
										2249.92	0.361602	0.990154	0.00276504		2129	0.348558	0.992892	0.00115621
										2246.26	0.361013	0.990502	0.00302807		2125.33	0.347957	0.993167	0.00108462
										2242.59	0.360424	0.990292	0.00341218		2121.67	0.347356	0.993066	0.00119365
										2238.93	0.359835	0.99012	0.00345984		2118	0.346755	0.992986	0.00105358
										2235.26	0.359246	0.989707	0.00390053		2114.34	0.346154	0.993107	0.00103254
										2231.6	0.358657	0.989044	0.00378528		2110.68	0.345553	0.993188	0.00107736
										2227.93	0.358068	0.989309	0.00381227		2107.01	0.344952	0.993127	0.00105136
										2224.27	0.357479	0.98982	0.00368659		2103.35	0.344351	0.993046	0.000876744
										2220.61	0.35689	0.989787	0.00383638		2099.68	0.34375	0.993026	0.00106741
										2216.94	0.356302	0.99001	0.00406417		2096.02	0.343149	0.993107	0.00113742
										2213.28	0.355713	0.990012	0.00398672		2092.35	0.342548	0.992864	0.000981268
										2209.61	0.355124	0.990155	0.00439377		2088.69	0.341947	0.992965	0.00102169
										2205.95	0.354535	0.990393	0.00404381		2085.03	0.341346	0.992907	0.00107257
										2202.28	0.353946	0.991228	0.00317358		2081.36	0.340745	0.992776	0.00095998
										2198.62	0.353357	0.990783	0.00263372		2077.7	0.340144	0.992947	0.000969305
										2194.95	0.352768	0.991183	0.00255567		2074.03	0.339543	0.993118	0.000706149
										2191.29	0.352179	0.991054	0.00257626		2070.37	0.338942	0.993031	0.00104877
										2187.63	0.35159	0.990789	0.00297684		2066.7	0.338341	0.992811	0.000869945
										2183.96	0.351001	0.990126	0.002874		2063.04	0.33774	0.992801	0.00123866
										2180.3	0.350412	0.98983	0.00277842		2059.37	0.337139	0.992664	0.00109244
										2176.63	0.349823	0.989147	0.00296405		2055.71	0.336539	0.992607	0.000975541
										2172.97	0.349234	0.989457	0.00259258		2052.05	0.335937	0.992195	0.00107396
										2169.3	0.348645	0.989606	0.00201177		2048.38	0.335337	0.991926	0.00174023
										2165.64	0.348056	0.989984	0.00132624		2044.72	0.334735	0.991747	0.00173619
										2161.98	0.347468	0.989848	0.0025551		2041.05	0.334135	0.992106	0.00255561
										2158.31	0.346879	0.989239	0.00265389		2037.39	0.333534	0.991804	0.00202036
										2154.65	0.34629	0.989414	0.00231835		2033.72	0.332933	0.991611	0.00250506
										2150.98	0.345701	0.98914	0.00244143		2030.06	0.332332	0.992077	0.00160986
										2147.32	0.345112	0.989415	0.00213502		2026.39	0.331731	0.991918	0.00169445
										2143.65	0.344523	0.989191	0.00208781		2022.73	0.33113	0.991784	0.00207588
										2139.99	0.343934	0.990416	0.000855944		2019.07	0.330529	0.991987	0.00168019
										2136.33	0.343345	0.991352	0.00155232		2015.4	0.329928	0.991721	0.00253444
										2132.66	0.342756	0.991819	0.00188569		2011.74	0.329327	0.991857	0.00200705
										2129	0.342167	0.992058	0.00151918		2008.07	0.328726	0.992142	0.00166232
										2125.33	0.341578	0.992101	0.00141266		2004.41	0.328125	0.992527	0.00108444
										2121.67	0.340989	0.991952	0.00159366		2000.74	0.327524	0.992815	0.000936756
										2118	0.340401	0.992105	0.00189243		1997.08	0.326923	0.993255	0.000916698
										2114.34	0.339811	0.991658	0.00203996		1993.42	0.326322	0.99313	0.00106731
										2110.68	0.339223	0.991637	0.0018467		1989.75	0.325721	0.993087	0.00106748
										2107.01	0.338634	0.991835	0.00142041		1986.09	0.32512	0.993612	0.000641725
										2103.35	0.338045	0.991491	0.00114487		1982.42	0.324519	0.993228	0.00100936
										2099.68	0.337456	0.990731	0.00143117		1978.76	0.323918	0.993268	0.000911843
										2096.02	0.336867	0.990418	0.00169881		1975.09	0.323317	0.993511	0.000753182
										2092.35	0.336278	0.990257	0.00230883		1971.43	0.322716	0.993531	0.00129494
										2088.69	0.335689	0.990741	0.00150502		1967.77	0.322115	0.993289	0.00108645
										2085.02	0.3351	0.989693	0.00110781		1964.1	0.321514	0.993349	0.000931845
										2081.36	0.334511	0.989754	0.000785644		1960.44	0.320913	0.993167	0.000667611
										2077.7	0.333922	0.98974	0.000620268		1956.77	0.320313	0.99339	0.00105928
										2074.03	0.333333	0.988942	0.000818244		1953.11	0.319711	0.993491	0.00105174
										2070.37	0.332744	0.988574	0.00148837		1949.44	0.319111	0.993393	0.000808301
										2066.7	0.332156	0.987787	0.00136132		1945.78	0.31851	0.993239	0.00113026
										2063.04	0.331567	0.987968	0.00128443		1942.12	0.317909	0.99307	0.00111003
										2059.37	0.330978	0.988345	0.0015709		1938.45	0.317308	0.992887	0.000915507
										2055.71	0.330389	0.989022	0.001661		1934.79	0.316707	0.99252	0.00100187
										2052.05	0.3298	0.989754	0.00181053		1931.12	0.316106	0.992961	0.000632837
										2048.38	0.329211	0.990124	0.0020562		1927.46	0.315505	0.992882	0.000795386
										2044.72	0.328622	0.990258	0.00250465		1923.79	0.314904	0.993164	0.000623637
										2041.05	0.328033	0.990538	0.00223157		1920.13	0.314303	0.993231	0.000878971
										2037.39	0.327444	0.991061	0.00194034		1916.46	0.313702	0.99309	0.000685574
										2033.72	0.326855	0.99079	0.00250609		1912.8	0.313101	0.992711	0.00116449
										2030.06	0.326266	0.991087	0.00217971		1909.13	0.3125	0.991878	0.00170431
										2026.39	0.325677	0.991279	0.00178854		1905.47	0.311899	0.991623	0.00200343
										2022.73	0.325088	0.990445	0.00259155		1901.81	0.311298	0.992075	0.00155671
										2019.07	0.324499	0.990671	0.00155331		1898.14	0.310697	0.992511	0.0010071
										2015.4	0.32391	0.989764	0.00187657		1894.48	0.310096	0.992515	0.00100772
										2011.74	0.323322	0.990258	0.00131407		1890.81	0.309495	0.9932	0.000955895
										2008.07	0.322733	0.990276	0.00211691		1887.15	0.308894	0.99339	0.000962892
										2004.41	0.322144	0.991169	0.00251815		1883.48	0.308293	0.993289	0.000874855
										2000.74	0.321555	0.992008	0.00212146		1879.82	0.307692	0.993329	0.000974239
										1997.08	0.320966	0.991663	0.00182496		1876.16	0.307091	0.993289	0.00104337
										1993.41	0.320377	0.992252	0.00194109		1872.49	0.30649	0.993208	0.00106761
										1989.75	0.319788	0.991895	0.0019376		1868.83	0.305889	0.993511	0.00132034
										1986.09	0.319199	0.992178	0.00244226		1865.16	0.305288	0.99345	0.00118219
										1982.42	0.31861	0.992055	0.002733		1861.5	0.304687	0.992735	0.000926612
										1978.76	0.318021	0.991799	0.00264213		1857.83	0.304087	0.99337	0.00094499
										1975.09	0.317432	0.991262	0.00324501		1854.17	0.303486	0.993511	0.00101683
										1971.43	0.316843	0.990453	0.00445707		1850.51	0.302885	0.993673	0.00113289
										1967.76	0.316254	0.990505	0.00401546		1846.84	0.302284	0.99337	0.00125259
										1964.1	0.315665	0.990173	0.0033331		1843.18	0.301683	0.99339	0.00117272
										1960.44	0.315077	0.989682	0.00302602		1839.51	0.301082	0.993753	0.000763174
										1956.77	0.314488	0.989121	0.00240449		1835.85	0.300481	0.99343	0.00105168
										1953.11	0.313899	0.988711	0.00227464		1832.18	0.29988	0.993228	0.00108469
										1949.44	0.31331	0.989183	0.00187983		1828.52	0.299279	0.993632	0.00105954
										1945.78	0.312721	0.98815	0.00164298		1824.86	0.298678	0.993511	0.000980189
										1942.11	0.312132	0.988235	0.00116366		1821.19	0.298077	0.993471	0.00108495
										1938.45	0.311543	0.988699	0.000714828		1817.53	0.297476	0.993511	0.001146
										1934.78	0.310954	0.988539	0.00128088		1813.86	0.296875	0.99343	0.00089299
										1931.12	0.310365	0.988355	0.0013348		1810.2	0.296274	0.993491	0.000893045
										1927.46	0.309776	0.988424	0.00096471		1806.53	0.295673	0.993612	0.000615444
										1923.79	0.309187	0.989234	0.000871999		1802.87	0.295072	0.993531	0.000772471
										1920.13	0.308598	0.989708	0.000978713		1799.2	0.294471	0.993814	0.000767941
										1916.46	0.308009	0.990417	0.00146559		1795.54	0.29387	0.99345	0.00101496
										1912.8	0.30742	0.990303	0.00124642		1791.88	0.293269	0.993319	0.000660347
										1909.13	0.306832	0.990628	0.00109445		1788.21	0.292668	0.993124	0.00121387
										1905.47	0.306243	0.990695	0.000571573		1784.55	0.292067	0.99241	0.0013759
										1901.81	0.305654	0.990953	0.000600557		1780.88	0.291466	0.992461	0.00179381
										1898.14	0.305065	0.991084	0.000929743		1777.22	0.290865	0.992266	0.00162591
										1894.48	0.304476	0.991162	0.000915853		1773.55	0.290264	0.992387	0.00215025
										1890.81	0.303887	0.991412	0.00103473		1769.89	0.289663	0.992418	0.00150451
										1887.15	0.303298	0.99163	0.000309375		1766.22	0.289063	0.992921	0.000865292
										1883.48	0.302709	0.991351	0.000233838		1762.56	0.288461	0.993236	0.000792569
										1879.82	0.30212	0.991424	0.00045146		1758.9	0.287861	0.993256	0.000625422
										1876.16	0.301531	0.991233	0.000390884		1755.23	0.28726	0.993423	0.000991938
										1872.49	0.300942	0.991109	0.000164594		1751.57	0.286659	0.993365	0.00097356
										1868.83	0.300353	0.990868	0.000339656		1747.9	0.286058	0.99332	0.000678333
										1865.16	0.299764	0.990909	0.000244669		1744.24	0.285457	0.993081	0.00112402
										1861.5	0.299175	0.99059	0.00106384		1740.57	0.284856	0.993191	0.00100188
										1857.83	0.298587	0.99053	0.00109177		1736.91	0.284255	0.992955	0.00108872
										1854.17	0.297998	0.990706	0.00169018		1733.25	0.283654	0.993285	0.000865304
										1850.51	0.297409	0.99111	0.00128358		1729.58	0.283053	0.993358	0.00105867
										1846.84	0.29682	0.990679	0.0019598		1725.92	0.282452	0.993428	0.000895816
										1843.18	0.296231	0.991108	0.00187563		1722.25	0.281851	0.993369	0.000759755
										1839.51	0.295642	0.992174	0.00164296		1718.59	0.28125	0.993058	0.00101502
										1835.85	0.295053	0.992573	0.00143868		1714.92	0.280649	0.992644	0.00116676
										1832.18	0.294464	0.993014	0.00117314		1711.26	0.280048	0.992677	0.00142917
										1828.52	0.293875	0.993418	0.000885369		1707.6	0.279447	0.992175	0.00191539
										1824.85	0.293286	0.993183	0.00107586		1703.93	0.278846	0.992225	0.00193116
										1821.19	0.292697	0.993296	0.0013346		1700.27	0.278245	0.992422	0.00179487
										1817.53	0.292108	0.993192	0.00125739		1696.6	0.277644	0.992705	0.0013677
										1813.86	0.291519	0.993156	0.00120648		1692.94	0.277043	0.992867	0.0012459
										1810.2	0.290931	0.992036	0.00145449		1689.27	0.276442	0.99282	0.000949733
										1806.53	0.290342	0.991392	0.00191437		1685.61	0.275841	0.992855	0.00142032
										1802.87	0.289753	0.990042	0.00268562		1681.94	0.27524	0.992817	0.0016125
										1799.2	0.289164	0.990327	0.00182118		1678.28	0.274639	0.99248	0.00155133
										1795.54	0.288575	0.990363	0.000952111		1674.62	0.274038	0.992839	0.000936822
										1791.88	0.287986	0.990619	0.000685505		1670.95	0.273437	0.99297	0.000873225
										1788.21	0.287397	0.990814	0.00138896		1667.29	0.272837	0.993022	0.00130482
										1784.55	0.286808	0.990202	0.00223091		1663.62	0.272236	0.992849	0.00119163
										1780.88	0.286219	0.991012	0.00187149		1659.96	0.271635	0.99239	0.00192495
										1777.22	0.28563	0.990901	0.00149618		1656.29	0.271034	0.992669	0.00114893
										1773.55	0.285041	0.990973	0.000542729		1652.63	0.270433	0.992773	0.00111165
										1769.89	0.284452	0.991133	0.000778878		1648.96	0.269832	0.993049	0.00127804
										1766.22	0.283863	0.991256	0.000984156		1645.3	0.269231	0.993418	0.00076342
										1762.56	0.283274	0.990975	0.000918148		1641.64	0.26863	0.99346	0.000939883
										1758.9	0.282686	0.990795	0.000750236		1637.97	0.268029	0.993511	0.00106793
										1755.23	0.282097	0.990401	0.000351386		1634.31	0.267428	0.993572	0.000966886
										1751.57	0.281508	0.990386	0.00143065		1630.64	0.266827	0.993673	0.00106585
										1747.9	0.280919	0.990637	0.00125069		1626.98	0.266226	0.993754	0.00101526
										1744.24	0.28033	0.990812	0.000693771		1623.32	0.265625	0.993612	0.001211
										1740.57	0.279741	0.990864	0.00142652		1619.65	0.265024	0.993632	0.00107151
										1736.91	0.279152	0.990761	0.00186733		1615.99	0.264423	0.993956	0.00105461
										1733.24	0.278563	0.99129	0.0020823		1612.32	0.263822	0.993653	0.00108685
										1729.58	0.277974	0.990612	0.0024589		1608.66	0.263221	0.993579	0.00105566
										1725.92	0.277385	0.989909	0.00213881		1604.99	0.26262	0.992993	0.00155198
										1722.25	0.276796	0.989683	0.00218762		1601.33	0.262019	0.992486	0.00202247
										1718.59	0.276207	0.989539	0.00194242		1597.66	0.261418	0.992157	0.00210339
										1714.92	0.275618	0.990186	0.00205649		1594	0.260817	0.992028	0.00195058
										1711.26	0.275029	0.990395	0.00137135		1590.34	0.260216	0.991932	0.00214397
										1707.59	0.274441	0.991026	0.00187241		1586.67	0.259615	0.991982	0.00198885
										1703.93	0.273852	0.99071	0.00187813		1583.01	0.259014	0.992266	0.0015536
										1700.27	0.273263	0.990727	0.00281654		1579.34	0.258413	0.992136	0.00181472
										1696.6	0.272674	0.991211	0.00298469		1575.68	0.257812	0.992974	0.00164279
										1692.94	0.272085	0.991701	0.00323339		1572.01	0.257212	0.993362	0.00167194
										1689.27	0.271496	0.991792	0.00252037		1568.35	0.256611	0.993445	0.00151659
										1685.61	0.270907	0.991954	0.00204553		1564.68	0.25601	0.9936	0.0012818
										1681.94	0.270318	0.992119	0.00140108		1561.02	0.255409	0.993654	0.00164875
										1678.28	0.269729	0.992448	0.00149939		1557.36	0.254808	0.99375	0.00175846
										1674.61	0.26914	0.992406	0.00166061		1553.69	0.254207	0.993378	0.00129798
										1670.95	0.268551	0.992871	0.00143529		1550.03	0.253606	0.993804	0.00115326
										1667.29	0.267962	0.993203	0.000921945		1546.36	0.253005	0.993639	0.000986968
										1663.62	0.267373	0.993334	0.00063383		1542.7	0.252404	0.993367	0.000916045
										1659.96	0.266784	0.993613	8.35042e-05		1539.03	0.251803	0.993128	0.000896643
										1656.29	0.266196	0.993282	0.000506531		1535.37	0.251202	0.993673	0.000897323
										1652.63	0.265607	0.993304	0.000459582		1531.7	0.250601	0.993713	0.00113811
										1648.97	0.265018	0.992783	0.000211437		1528.04	0.25	0.993774	0.00110046
										1645.3	0.264429	0.992737	0.000271451		1524.38	0.249399	0.994005	0.00115821
										1641.64	0.26384	0.992838	0.000455478		1520.71	0.248798	0.993736	0.001308
										1637.97	0.263251	0.992319	0.000524245		1517.05	0.248197	0.992216	0.00229746
										1634.31	0.262662	0.99235	0.000973937		1513.38	0.247596	0.99185	0.0019414
										1630.64	0.262073	0.991924	0.00114255		1509.72	0.246995	0.992293	0.00125013
										1626.98	0.261484	0.991884	0.00189256		1506.06	0.246394	0.991938	0.00162609
										1623.31	0.260895	0.991561	0.00206969		1502.39	0.245793	0.991996	0.0021364
										1619.65	0.260306	0.991435	0.00206377		1498.73	0.245192	0.991716	0.00194828
										1615.99	0.259717	0.991745	0.00179514		1495.06	0.244591	0.992997	0.00138815
										1612.32	0.259128	0.991635	0.00183935		1491.4	0.24399	0.993758	0.00076164
										1608.66	0.258539	0.991927	0.00111689		1487.73	0.243389	0.993915	0.00115704
										1604.99	0.25795	0.991831	0.00107542		1484.07	0.242788	0.993754	0.0010887
										1601.33	0.257362	0.991418	0.00112609		1480.4	0.242188	0.993976	0.000788517
										1597.66	0.256773	0.991221	0.00120103		1476.74	0.241587	0.993774	0.00110046
										1594	0.256184	0.991194	0.000810095		1473.08	0.240986	0.993835	0.00121488
										1590.34	0.255595	0.991351	0.00115778		1469.41	0.240385	0.993915	0.00111334
										1586.67	0.255006	0.991221	0.00126739		1465.75	0.239784	0.993835	0.00113825
										1583.01	0.254417	0.990537	0.000864557		1462.08	0.239183	0.993895	0.00113832
										1579.34	0.253828	0.990961	0.00152237		1458.42	0.238582	0.993855	0.00102024
										1575.68	0.253239	0.991494	0.00205123		1454.75	0.237981	0.993754	0.00112026
										1572.01	0.25265	0.991552	0.0019081		1451.09	0.23738	0.993956	0.00114163
										1568.35	0.252061	0.991769	0.0022109		1447.42	0.236779	0.993753	0.000862582
										1564.68	0.251472	0.992427	0.00155799		1443.76	0.236178	0.994033	0.000627554
										1561.02	0.250883	0.991958	0.00167719		1440.1	0.235577	0.993654	0.00114247
										1557.36	0.250295	0.991971	0.00182183		1436.43	0.234976	0.994026	0.000309715
										1553.69	0.249705	0.992154	0.0019323		1432.77	0.234375	0.993713	0.00103673
										1550.03	0.249117	0.992647	0.00180883		1429.1	0.233774	0.993754	0.00103147
										1546.36	0.248528	0.99275	0.00206865		1425.44	0.233173	0.993733	0.00110315
										1542.7	0.247939	0.99279	0.00143516		1421.77	0.232572	0.993794	0.000897432
										1539.03	0.24735	0.992293	0.00181019		1418.11	0.231971	0.993754	0.00118253
										1535.37	0.246761	0.992041	0.00193057		1414.45	0.23137	0.993424	0.00138083
										1531.7	0.246172	0.99194	0.00185826		1410.78	0.230769	0.993664	0.0015413
										1528.04	0.245583	0.992126	0.00159726		1407.12	0.230168	0.993744	0.00130351
										1524.38	0.244994	0.991926	0.00158615		1403.45	0.229567	0.993622	0.00123262
										1520.71	0.244405	0.992021	0.00223547		1399.79	0.228966	0.993708	0.0011221
										1517.05	0.243816	0.991967	0.00159299		1396.12	0.228365	0.993531	0.00143843
										1513.38	0.243227	0.992523	0.0010176		1392.46	0.227764	0.993397	0.000850159
										1509.72	0.242638	0.992275	0.000957393		1388.8	0.227163	0.993632	0.00127794
										1506.06	0.24205	0.992384	0.00122446		1385.13	0.226562	0.993673	0.00112296
										1502.39	0.241461	0.99217	0.000748069		1381.47	0.225962	0.993632	0.001173
										1498.73	0.240872	0.992111	0.000234588		1377.8	0.225361	0.993929	0.000752239
										1495.06	0.240283	0.991911	0.000336075		1374.14	0.22476	0.993812	0.000856156
										1491.4	0.239694	0.991432	0.000766213		1370.47	0.224159	0.994033	0.000639983
										1487.73	0.239105	0.991455	0.000706098		1366.81	0.223558	0.993586	0.00100709
										1484.07	0.238516	0.991133	0.000755893		1363.14	0.222957	0.993803	0.000618557
										1480.4	0.237927	0.991483	0.000620247		1359.48	0.222356	0.99376	0.000916406
										1476.74	0.237338	0.992086	0.000601132		1355.82	0.221755	0.993794	0.000897432
										1473.08	0.236749	0.992582	0.00107366		1352.15	0.221154	0.993956	0.00108562
										1469.41	0.23616	0.992635	0.00125082		1348.49	0.220553	0.994016	0.000875494
										1465.75	0.235571	0.99287	0.00126544		1344.82	0.219952	0.994077	0.000940401
										1462.08	0.234982	0.99349	0.000824561		1341.16	0.219351	0.993855	0.000998328
										1458.42	0.234393	0.993082	0.000506411		1337.49	0.21875	0.993976	0.000874833
										1454.75	0.233804	0.992911	0.000488684		1333.83	0.218149	0.994219	0.00110369
										1451.09	0.233216	0.993	0.000478889		1330.16	0.217548	0.994259	0.000940572
										1447.42	0.232627	0.992784	0.000634469		1326.5	0.216947	0.993935	0.000825741
										1443.76	0.232038	0.992632	0.000932526		1322.84	0.216346	0.994077	0.000573402
										1440.1	0.231449	0.992759	0.00118046		1319.17	0.215745	0.994036	0.000630413
										1436.43	0.23086	0.99285	0.00102354		1315.51	0.215144	0.993996	0.000710862
										1432.77	0.230271	0.99251	0.0010687		1311.84	0.214543	0.994178	0.000710992
										1429.1	0.229682	0.992308	0.00183499		1308.18	0.213942	0.994198	0.000690014
										1425.44	0.229093	0.99181	0.00176378		1304.52	0.213341	0.993956	0.000718536
										1421.77	0.228504	0.991468	0.0019647		1300.85	0.21274	0.994117	0.000758516
										1418.11	0.227915	0.991124	0.00281023		1297.19	0.212139	0.994158	0.000683695
										1414.44	0.227326	0.991167	0.00266326		1293.52	0.211538	0.993344	0.00184335
										1410.78	0.226737	0.991026	0.00282523		1289.86	0.210938	0.993266	0.0015014
										1407.12	0.226148	0.991423	0.00203653		1286.19	0.210336	0.993906	0.00083345
										1403.45	0.225559	0.991467	0.00225606		1282.53	0.209736	0.994216	0.000681574
										1399.79	0.224971	0.991697	0.00204802		1278.86	0.209135	0.994178	0.000494154
										1396.12	0.224382	0.991759	0.00224263		1275.2	0.208534	0.994057	0.000582974
										1392.46	0.223793	0.991961	0.00235551		1271.54	0.207933	0.994117	0.000703128
										1388.8	0.223204	0.991958	0.00226735		1267.87	0.207332	0.994117	0.000710949
										1385.13	0.222615	0.992021	0.00231645		1264.21	0.206731	0.994198	0.000563748
										1381.47	0.222026	0.992228	0.00232256		1260.54	0.20613	0.994158	0.000745507
										1377.8	0.221437	0.992159	0.00254436		1256.88	0.205529	0.994016	0.000560367
										1374.14	0.220848	0.992187	0.0025084		1253.21	0.204928	0.994502	0.000471446
										1370.47	0.220259	0.991905	0.00294081		1249.55	0.204327	0.99401	0.000570085
										1366.81	0.21967	0.991973	0.00275034		1245.88	0.203726	0.99392	0.000371818
										1363.14	0.219081	0.991756	0.00311821		1242.22	0.203125	0.993833	0.000397352
										1359.48	0.218492	0.992261	0.0026428		1238.56	0.202524	0.993796	0.000438666
										1355.82	0.217903	0.9924	0.00229746		1234.89	0.201923	0.99347	0.000844267
										1352.15	0.217314	0.99204	0.00276173		1231.23	0.201322	0.993237	0.00148305
										1348.49	0.216726	0.991549	0.00280409		1227.56	0.200721	0.993456	0.0012909
										1344.82	0.216137	0.991861	0.0021194		1223.9	0.20012	0.993559	0.000892716
										1341.16	0.215548	0.992526	0.00146732		1220.23	0.199519	0.993139	0.00181807
										1337.49	0.214959	0.992962	0.000953983		1216.57	0.198918	0.992728	0.00254897
										1333.83	0.21437	0.99351	0.000774216		1212.9	0.198317	0.992945	0.00220898
										1330.16	0.213781	0.993654	0.00090016		1209.24	0.197716	0.993143	0.00270046
										1326.5	0.213192	0.993812	0.000716813		1205.58	0.197115	0.992724	0.00266028
										1322.84	0.212603	0.993684	0.00078937		1201.91	0.196514	0.992896	0.00287579
										1319.17	0.212014	0.993682	0.000956694		1198.25	0.195914	0.992882	0.00278778
										1315.51	0.211425	0.99369	0.000968602		1194.58	0.195312	0.992979	0.00287532
										1311.84	0.210836	0.9934	0.000753552		1190.92	0.194712	0.992986	0.00275002
										1308.18	0.210247	0.993709	0.000643343		1187.26	0.194111	0.992758	0.0028095
										1304.51	0.209658	0.993933	0.000544203		1183.59	0.19351	0.99301	0.00219037
										1300.85	0.209069	0.993726	0.00054761		1179.93	0.192909	0.992958	0.00213528
										1297.19	0.208481	0.993128	0.00105797		1176.26	0.192308	0.992531	0.00133319
										1293.52	0.207892	0.992418	0.00166479		1172.6	0.191707	0.992496	0.00141721
										1289.86	0.207303	0.991742	0.00245773		1168.93	0.191106	0.992142	0.00182555
										1286.19	0.206714	0.991535	0.00309364		1165.27	0.190505	0.992155	0.00128588
										1282.53	0.206125	0.990634	0.00402311		1161.6	0.189904	0.992825	0.000945998
										1278.86	0.205536	0.989884	0.00456876		1157.94	0.189303	0.992209	0.0017082
										1275.2	0.204947	0.989467	0.00432025		1154.28	0.188702	0.99177	0.00247485
										1271.54	0.204358	0.989428	0.00438901		1150.61	0.188101	0.991227	0.00249729
										1267.87	0.203769	0.989918	0.00426921		1146.95	0.1875	0.991296	0.00170925
										1264.21	0.20318	0.990034	0.00435982		1143.28	0.186899	0.991845	0.00166738
										1260.54	0.202591	0.991059	0.0030222		1139.62	0.186298	0.992024	0.00259208
										1256.88	0.202002	0.99164	0.00259815		1135.95	0.185697	0.992534	0.00259414
										1253.21	0.201413	0.991438	0.00296786		1132.29	0.185096	0.992798	0.00223802
										1249.55	0.200825	0.992075	0.00200325		1128.62	0.184495	0.993149	0.00172383
										1245.88	0.200236	0.9921	0.00215449		1124.96	0.183894	0.993717	0.00197389
										1242.22	0.199647	0.992572	0.00184712		1121.3	0.183293	0.993719	0.00165379
										1238.56	0.199058	0.992444	0.00142762		1117.63	0.182692	0.993714	0.00150581
										1234.89	0.198469	0.992352	0.00156516		1113.97	0.182091	0.99381	0.00128638
										1231.23	0.19788	0.992434	0.00167917		1110.3	0.18149	0.993875	0.00149086
										1227.56	0.197291	0.992616	0.00168108		1106.64	0.180889	0.993931	0.00133942
										1223.9	0.196702	0.992318	0.00238141		1102.97	0.180288	0.993719	0.00151606
										1220.23	0.196113	0.993109	0.00250031		1099.31	0.179688	0.993817	0.00127265
										1216.57	0.195524	0.993114	0.00239128		1095.65	0.179086	0.993671	0.0012065
										1212.9	0.194935	0.993455	0.00159292		1091.98	0.178486	0.993628	0.000973824
										1209.24	0.194346	0.993356	0.0019225		1088.32	0.177885	0.99328	0.00110013
										1205.58	0.193757	0.993347	0.00152914		1084.65	0.177284	0.993314	0.00139043
										1201.91	0.193168	0.99318	0.00229596		1080.99	0.176683	0.99345	0.00132193
										1198.25	0.19258	0.993038	0.00246591		1077.32	0.176082	0.993278	0.00134219
										1194.58	0.191991	0.992772	0.00196084		1073.66	0.175481	0.993518	0.0013992
										1190.92	0.191402	0.992135	0.00190936		1069.99	0.17488	0.993398	0.000986582
										1187.25	0.190813	0.992377	0.00150517		1066.33	0.174279	0.993495	0.00115994
										1183.59	0.190224	0.992082	0.00212867		1062.67	0.173678	0.993595	0.0011174
										1179.93	0.189635	0.991959	0.00271126		1059	0.173077	0.993898	0.00140337
										1176.26	0.189046	0.9918	0.00303666		1055.34	0.172476	0.993814	0.0013369
										1172.6	0.188457	0.991681	0.00309208		1051.67	0.171875	0.993825	0.00149462
										1168.93	0.187868	0.991714	0.00374663		1048.01	0.171274	0.99369	0.00160595
										1165.27	0.187279	0.992051	0.00338558		1044.35	0.170673	0.993627	0.00213014
										1161.6	0.18669	0.992736	0.00236661		1040.68	0.170072	0.993216	0.00209036
										1157.94	0.186101	0.992937	0.00193499		1037.02	0.169471	0.993105	0.00174183
										1154.27	0.185512	0.993243	0.00111459		1033.35	0.16887	0.992911	0.00204429
										1150.61	0.184923	0.993328	0.000709431		1029.69	0.168269	0.993165	0.00174066
										1146.95	0.184335	0.993534	0.000706804		1026.02	0.167668	0.993115	0.00190102
										1143.28	0.183746	0.993227	0.00123267		1022.36	0.167067	0.993479	0.00212888
										1139.62	0.183157	0.992893	0.00178106		1018.69	0.166466	0.993885	0.00141937
										1135.95	0.182568	0.99269	0.00244916		1015.03	0.165865	0.994348	0.0004596
										1132.29	0.181979	0.993053	0.00184295		1011.37	0.165264	0.994542	0.000185447
										1128.62	0.18139	0.992744	0.00216463		1007.7	0.164664	0.994461	0.000424842
										1124.96	0.180801	0.992843	0.00156355		1004.04	0.164062	0.994562	0.000350443
										1121.3	0.180212	0.993151	0.00133008		1000.37	0.163462	0.994336	0.000316908
										1117.63	0.179623	0.993048	0.0017865		996.708	0.16286	0.994421	0.000185424
										1113.97	0.179034	0.992915	0.00156774		993.043	0.16226	0.994455	0.000100261
										1110.3	0.178445	0.993118	0.000967641		989.379	0.161659	0.993844	0.00118857
										1106.64	0.177856	0.993412	0.000880043		985.715	0.161058	0.993192	0.00194385
										1102.97	0.177267	0.993046	0.00135118		982.05	0.160457	0.993817	0.00148614
										1099.31	0.176678	0.992982	0.00210748		978.386	0.159856	0.993682	0.00157821
										1095.65	0.17609	0.99269	0.00228001		974.722	0.159255	0.993567	0.00112589
										1091.98	0.175501	0.992622	0.00261244		971.057	0.158654	0.993641	0.00119016
										1088.32	0.174912	0.992462	0.0024893		967.393	0.158053	0.99394	0.000762493
										1084.65	0.174323	0.992412	0.00193457		963.729	0.157452	0.994157	0.000425341
										1080.99	0.173734	0.992247	0.00244183		960.064	0.156851	0.99439	0.000254517
										1077.32	0.173145	0.991983	0.00288058		956.4	0.15625	0.99434	0.000264527
										1073.66	0.172556	0.99172	0.00340005		952.735	0.155649	0.994461	0.000424842
										1069.99	0.171967	0.991437	0.00389119		949.071	0.155048	0.994279	0.000378962
										1066.33	0.171378	0.991563	0.00357293		945.407	0.154447	0.994461	0.00042048
										1062.67	0.170789	0.990977	0.00402766		941.742	0.153846	0.994307	0.00043426
										1059	0.1702	0.990995	0.00402305		938.078	0.153245	0.99412	0.000907504
										1055.34	0.169611	0.991114	0.00411284		934.414	0.152644	0.993641	0.00128676
										1051.67	0.169022	0.991077	0.00380856		930.749	0.152043	0.992826	0.0023042
										1048.01	0.168433	0.991539	0.00333423		927.085	0.151442	0.992035	0.00384716
										1044.34	0.167844	0.992012	0.00328204		923.42	0.150841	0.991672	0.00462727
										1040.68	0.167256	0.991668	0.00319107		919.756	0.15024	0.991964	0.0041188
										1037.02	0.166667	0.991478	0.00296851		916.092	0.149639	0.99266	0.00295566
										1033.35	0.166078	0.99151	0.00295224		912.427	0.149038	0.992951	0.00242708
										1029.69	0.165489	0.992038	0.00285407		908.763	0.148438	0.993392	0.00201119
										1026.02	0.1649	0.992271	0.00321448		905.099	0.147836	0.993988	0.000850799
										1022.36	0.164311	0.992033	0.00340558		901.434	0.147236	0.994226	0.000415767
										1018.69	0.163722	0.992338	0.00305775		897.77	0.146635	0.994214	0.000242857
										1015.03	0.163133	0.991773	0.00371182		894.106	0.146034	0.99406	0.000545594
										1011.37	0.162544	0.992087	0.00380112		890.441	0.145433	0.993834	0.000972797
										1007.7	0.161955	0.991727	0.00423089		886.777	0.144832	0.993321	0.00117505
										1004.04	0.161366	0.991775	0.00386923		883.112	0.144231	0.993375	0.00110917
										1000.37	0.160777	0.991834	0.00402572		879.448	0.14363	0.993498	0.000749481
										996.708	0.160189	0.991415	0.00454393		875.784	0.143029	0.993451	0.000854079
										993.043	0.159599	0.991651	0.00450128		872.119	0.142428	0.993677	0.00117256
										989.379	0.159011	0.991311	0.00535496		868.455	0.141827	0.993833	0.00112878
										985.715	0.158422	0.991425	0.00467948		864.791	0.141226	0.994159	0.000554607
										982.05	0.157833	0.991118	0.00463873		861.126	0.140625	0.994522	0.000264576
										978.386	0.157244	0.991577	0.00415719		857.462	0.140024	0.994886	0.000585693
										974.721	0.156655	0.991287	0.00455176		853.798	0.139423	0.994644	0.000121421
										971.057	0.156066	0.991194	0.00522691		850.133	0.138822	0.994489	9.11134e-05
										967.393	0.155477	0.991082	0.00536452		846.469	0.138221	0.994522	0.000264576
										963.728	0.154888	0.991575	0.00462203		842.804	0.13762	0.994542	0.000404154
										960.064	0.154299	0.991734	0.00425276		839.14	0.137019	0.994347	0.000986891
										956.4	0.15371	0.991901	0.00352196		835.476	0.136418	0.993979	0.00125778
										952.735	0.153121	0.991898	0.00409892		831.811	0.135817	0.994017	0.00135573
										949.071	0.152532	0.991856	0.00353888		828.147	0.135216	0.99429	0.000671079
										945.407	0.151944	0.991597	0.00398063		824.483	0.134615	0.994604	0.000173282
										941.742	0.151355	0.99139	0.00453989		820.818	0.134014	0.994765	0.000598067
										938.078	0.150766	0.991385	0.00447545		817.154	0.133413	0.994522	0.000321181
										934.413	0.150177	0.990861	0.0045276		813.489	0.132812	0.994502	0.000404121
										930.749	0.149588	0.991664	0.00334807		809.825	0.132212	0.994684	0.000413219
										927.085	0.148999	0.991903	0.00269174		806.161	0.131611	0.994684	0.000455671
										923.42	0.14841	0.992017	0.00205682		802.496	0.13101	0.994663	3.50518e-05
										919.756	0.147821	0.991825	0.00207304		798.832	0.130409	0.994664	0.000447459
										916.092	0.147232	0.991958	0.00217451		795.168	0.129808	0.994502	0.000299406
										912.427	0.146643	0.991777	0.00239048		791.503	0.129207	0.994623	0.000311513
										908.763	0.146054	0.992015	0.00196083		787.839	0.128606	0.994481	0.000280337
										905.099	0.145465	0.992314	0.00192369		784.175	0.128005	0.994583	0.000315408
										901.434	0.144876	0.992232	0.00197839		780.51	0.127404	0.994502	0.000355643
										897.77	0.144287	0.992204	0.00195498		776.846	0.126803	0.994461	0.000369176
										894.105	0.143698	0.991736	0.00238737		773.181	0.126202	0.994583	0.000481781
										890.441	0.14311	0.991388	0.00284371		769.517	0.125601	0.994384	0.000420981
										886.777	0.142521	0.991644	0.00215722		765.853	0.125	0.994069	0.000805712
										883.112	0.141932	0.991994	0.00199974		762.188	0.124399	0.993615	0.00126876
										879.448	0.141343	0.992067	0.0020446		758.524	0.123798	0.993711	0.00119004
										875.784	0.140754	0.992374	0.00198906		754.86	0.123197	0.993809	0.00106817
										872.119	0.140165	0.992428	0.00203527		751.195	0.122596	0.993622	0.00146511
										868.455	0.139576	0.992313	0.00207162		747.531	0.121995	0.99366	0.00186138
										864.791	0.138987	0.99239	0.00261863		743.867	0.121394	0.993487	0.00189696
										861.126	0.138398	0.992047	0.00337297		740.202	0.120793	0.993156	0.0024888
										857.462	0.137809	0.991449	0.00410954		736.538	0.120192	0.99353	0.00165263
										853.797	0.13722	0.991386	0.00457092		732.873	0.119591	0.994041	0.000849421
										850.133	0.136631	0.991677	0.00412425		729.209	0.11899	0.994214	0.000753181
										846.469	0.136042	0.99163	0.00439638		725.545	0.118389	0.993806	0.00114049
										842.804	0.135453	0.991562	0.00516672		721.88	0.117788	0.993283	0.00225346
										839.14	0.134865	0.991149	0.00569442		718.216	0.117188	0.99331	0.00236641
										835.476	0.134276	0.99142	0.00495469		714.552	0.116587	0.993341	0.00199813
										831.811	0.133687	0.99212	0.00374134		710.887	0.115986	0.993184	0.00211044
										828.147	0.133098	0.99234	0.0032079		707.223	0.115385	0.993089	0.00224441
										824.482	0.132509	0.992407	0.00329631		703.558	0.114784	0.993006	0.00248367
										820.818	0.13192	0.992765	0.00337226		699.894	0.114183	0.993408	0.00188838
										817.154	0.131331	0.992523	0.00267494		696.23	0.113582	0.993785	0.00139306
										813.489	0.130742	0.992733	0.00278205		692.565	0.112981	0.993933	0.000970915
										809.825	0.130153	0.992229	0.0029877		688.901	0.11238	0.993734	0.000953746
										806.161	0.129564	0.991924	0.00299807		685.237	0.111779	0.993159	0.00139229
										802.496	0.128975	0.991677	0.00319894		681.572	0.111178	0.992884	0.00217782
										798.832	0.128386	0.991978	0.00315969		677.908	0.110577	0.992789	0.0026222
										795.168	0.127797	0.992018	0.00313567		674.244	0.109976	0.992801	0.00273413
										791.503	0.127208	0.991812	0.0028466		670.579	0.109375	0.992578	0.00341927
										787.839	0.12662	0.992143	0.00241448		666.915	0.108774	0.991773	0.00382092
										784.174	0.126031	0.992278	0.00245736		663.25	0.108173	0.991986	0.00326621
										780.51	0.125442	0.991649	0.00318988		659.586	0.107572	0.993176	0.00133207
										776.846	0.124853	0.991083	0.00352695		655.922	0.106971	0.993287	0.0013232
										773.181	0.124264	0.991297	0.00339879		652.257	0.10637	0.99304	0.00144919
										769.517	0.123675	0.991446	0.00319603		648.593	0.105769	0.992929	0.00171539
										765.853	0.123086	0.991773	0.00317383		644.929	0.105168	0.992345	0.00214069
										762.188	0.122497	0.991591	0.00390573		641.264	0.104567	0.993027	0.00100405
										758.524	0.121908	0.991591	0.00419118		637.6	0.103966	0.993293	0.00117728
										754.86	0.121319	0.991362	0.00384677		633.935	0.103365	0.993108	0.00137388
										751.195	0.12073	0.992397	0.00255986		630.271	0.102764	0.993086	0.00150015
										747.531	0.120141	0.992221	0.00286137		626.607	0.102163	0.993031	0.00133505
										743.866	0.119552	0.992781	0.00266138		622.942	0.101562	0.993734	0.00107413
										740.202	0.118963	0.992684	0.00243499		619.278	0.100962	0.994011	0.000818947
										736.538	0.118375	0.99266	0.00242106		615.614	0.100361	0.993797	0.00147754
										732.873	0.117786	0.992707	0.00267928		611.949	0.0997596	0.993392	0.00255732
										729.209	0.117197	0.992672	0.0031029		608.285	0.0991587	0.992436	0.00395564
										725.545	0.116608	0.99216	0.00331108		604.621	0.0985577	0.991553	0.00532024
										721.88	0.116019	0.992041	0.00413984		600.956	0.0979568	0.992187	0.00430746
										718.216	0.11543	0.991827	0.00398489		597.292	0.0973557	0.992972	0.00295107
										714.552	0.114841	0.991884	0.00388842		593.627	0.0967548	0.993249	0.00221246
										710.887	0.114252	0.991943	0.00441557		589.963	0.0961539	0.993078	0.00292231
										707.223	0.113663	0.991869	0.00448968		586.299	0.0955528	0.992871	0.00291624
										703.558	0.113074	0.991509	0.00527082		582.634	0.0949519	0.992071	0.00471922
										699.894	0.112485	0.991255	0.00526439		578.97	0.094351	0.991192	0.00598223
										696.23	0.111896	0.991221	0.0052349		575.306	0.09375	0.991469	0.00535118
										692.565	0.111307	0.991777	0.00416288		571.641	0.0931491	0.991571	0.00553146
										688.901	0.110719	0.991231	0.00539219		567.977	0.0925482	0.991079	0.00633264
										685.237	0.11013	0.991253	0.00487438		564.313	0.0919471	0.991418	0.00548494
										681.572	0.109541	0.991525	0.00454394		560.648	0.0913462	0.991316	0.00555437
										677.908	0.108952	0.991404	0.00452674		556.984	0.0907451	0.990785	0.00668254
										674.243	0.108363	0.990931	0.00529211		553.319	0.0901442	0.991404	0.00645937
										670.579	0.107774	0.991178	0.00446342		549.655	0.0895433	0.990859	0.00687304
										666.915	0.107185	0.991396	0.00395247		545.991	0.0889423	0.990497	0.00718185
										663.25	0.106596	0.99155	0.00372893		542.326	0.0883413	0.99009	0.00804579
										659.586	0.106007	0.99179	0.0039802		538.662	0.0877404	0.990168	0.00775409
										655.922	0.105418	0.991656	0.00441995		534.998	0.0871394	0.990234	0.00775063
										652.257	0.104829	0.991413	0.00445521		531.333	0.0865385	0.990539	0.00695595
										648.593	0.10424	0.991646	0.00424034		527.669	0.0859374	0.99006	0.00766106
										644.929	0.103651	0.991817	0.00355725		524.004	0.0853365	0.991596	0.00501733
										641.264	0.103062	0.992036	0.00331594		520.34	0.0847356	0.99268	0.00366421
										637.6	0.102474	0.991863	0.00368843		516.676	0.0841345	0.993134	0.00213926
										633.935	0.101885	0.991582	0.00352948		513.011	0.0835336	0.993085	0.00174429
										630.271	0.101296	0.990824	0.00404004		509.347	0.0829327	0.993333	0.00204432
										626.607	0.100707	0.990454	0.00428323		505.683	0.0823317	0.993312	0.00210894
										622.942	0.100118	0.990413	0.00502579		502.018	0.0817308	0.993529	0.00240368
										619.278	0.0995289	0.990661	0.0049275		498.354	0.0811299	0.992924	0.00270746
										615.614	0.09894	0.990425	0.00422789		494.69	0.0805288	0.992114	0.00307757
										611.949	0.098351	0.990579	0.00422766		491.025	0.0799279	0.992999	0.000945599
										608.285	0.0977621	0.990949	0.00424308		487.361	0.0793268	0.99325	0.000619068
										604.621	0.0971732	0.99083	0.00491449		483.696	0.0787259	0.99342	0.000551942
										600.956	0.0965842	0.990643	0.0050058		480.032	0.078125	0.992767	0.000573077
										597.292	0.0959953	0.990477	0.00506912		476.368	0.077524	0.991582	0.00235558
										593.627	0.0954063	0.991249	0.00437032		472.703	0.0769231	0.988511	0.00718821
										589.963	0.0948174	0.991233	0.0040883		469.039	0.0763222	0.987809	0.00933061
										586.299	0.0942286	0.991268	0.00442237		465.375	0.0757211	0.987221	0.0109052
										582.634	0.0936395	0.991361	0.00396777		461.71	0.0751202	0.987354	0.0120071
										578.97	0.0930507	0.991936	0.00389573		458.046	0.0745193	0.986978	0.0132066
										575.306	0.0924618	0.991664	0.00406569		454.382	0.0739182	0.987546	0.0116998
										571.641	0.0918728	0.991461	0.00438957		450.717	0.0733173	0.986316	0.0134151
										567.977	0.0912839	0.990881	0.00531225		447.053	0.0727163	0.985032	0.0152404
										564.313	0.090695	0.991127	0.00500986		443.388	0.0721154	0.983184	0.0174568
										560.648	0.090106	0.991225	0.00507275		439.724	0.0715145	0.981082	0.0206432
										556.984	0.0895171	0.991879	0.00388849		436.06	0.0709134	0.9794	0.0236907
										553.319	0.0889281	0.991591	0.0042588		432.395	0.0703125	0.979324	0.026
										549.655	0.0883392	0.991523	0.00425103		428.731	0.0697116	0.980367	0.0247275
										545.991	0.0877504	0.991374	0.00442307		425.067	0.0691105	0.980038	0.0253512
										542.326	0.0871613	0.991598	0.00453579		421.402	0.0685096	0.977984	0.0282976
										538.662	0.0865725	0.991587	0.00435962		417.738	0.0679086	0.975924	0.0310031
										534.998	0.0859836	0.991516	0.00476799		414.073	0.0673077	0.972181	0.0375943
										531.333	0.0853946	0.991651	0.00460907		410.409	0.0667068	0.9681	0.0439891
										527.669	0.0848057	0.992062	0.00415577		406.745	0.0661057	0.97638	0.0293159
										524.004	0.0842167	0.99219	0.00388135		403.08	0.0655048	0.979451	0.0235537
										520.34	0.0836278	0.991755	0.00423776		399.416	0.0649039	0.98027	0.0208896
										516.676	0.0830389	0.992059	0.00398528		395.752	0.0643028	0.981577	0.0189367
										513.011	0.0824499	0.992103	0.00344955		392.087	0.0637019	0.980114	0.0198637
										509.347	0.081861	0.991787	0.00375792		388.423	0.063101	0.975963	0.0242558
										505.683	0.0812722	0.991733	0.00365646		384.759	0.0625	0.972556	0.0288008
										502.018	0.0806831	0.99216	0.00420671		381.094	0.0618991	0.977431	0.0215863
										498.354	0.0800943	0.992163	0.0039534		377.43	0.061298	0.980494	0.0182076
										494.69	0.0795054	0.99188	0.00448164		373.765	0.0606971	0.978659	0.0226896
										491.025	0.0789164	0.991602	0.00453121		370.101	0.0600962	0.972388	0.0322913
										487.361	0.0783275	0.992209	0.00411776		366.437	0.0594951	0.966319	0.0423992
										483.696	0.0777385	0.991825	0.00462981		362.772	0.0588942	0.969364	0.0358992
										480.032	0.0771496	0.991818	0.00442315		359.108	0.0582933	0.970059	0.0351407
										476.368	0.0765607	0.991621	0.00437975		355.444	0.0576923	0.968873	0.0390658
										472.703	0.0759717	0.991555	0.00434045		351.779	0.0570914	0.967983	0.0390464
										469.039	0.0753828	0.991103	0.00518537		348.115	0.0564903	0.963828	0.0454635
										465.375	0.074794	0.990861	0.00494844		344.45	0.0558894	0.962514	0.0472147
										461.71	0.0742049	0.990732	0.00495825		340.786	0.0552885	0.95471	0.059121
										458.046	0.0736161	0.99025	0.00499737		337.122	0.0546874	0.94782	0.0719391
										454.382	0.0730272	0.990586	0.00511612		333.457	0.0540865	0.961922	0.0500988
										450.717	0.0724382	0.990883	0.00521914		329.793	0.0534856	0.956829	0.0619009
										447.053	0.0718493	0.991068	0.00526468		326.129	0.0528846	0.953181	0.0680959
										443.388	0.0712603	0.991545	0.00460507		322.464	0.0522837	0.951742	0.0699164
										439.724	0.0706714	0.991624	0.00448317		318.8	0.0516828	0.945814	0.0797031
										436.06	0.0700825	0.991895	0.00442693		315.136	0.0510817	0.946218	0.080538
										432.395	0.0694935	0.991833	0.0042753		311.471	0.0504808	0.93937	0.0935608
										428.731	0.0689046	0.991687	0.00432193		307.807	0.0498797	0.929768	0.109982
										425.067	0.0683157	0.991843	0.00399647		304.142	0.0492788	0.944189	0.0859254
										421.402	0.0677267	0.991668	0.00347998		300.478	0.0486779	0.953016	0.0696494
										417.738	0.0671378	0.991227	0.00421238		296.814	0.0480769	0.959594	0.0584949
										414.073	0.0665488	0.991081	0.0041588		293.149	0.047476	0.963161	0.0523299
										410.409	0.0659599	0.991015	0.00453786		289.485	0.0468751	0.966841	0.0446913
										406.745	0.0653711	0.990441	0.00441771		285.821	0.046274	0.96614	0.0449027
										403.08	0.064782	0.990803	0.00504123		282.156	0.0456731	0.965038	0.0441194
										399.416	0.0641932	0.990242	0.00576276		278.492	0.0450722	0.967344	0.0401935
										395.752	0.0636043	0.990392	0.00553329		274.828	0.0444711	0.963579	0.0449215
										392.087	0.0630153	0.989959	0.00584452		271.163	0.0438702	0.962338	0.0435801
										388.423	0.0624264	0.989896	0.00572259		267.499	0.0432692	0.959472	0.0453526
										384.759	0.0618375	0.990019	0.00576307		263.834	0.0426683	0.955077	0.0512599
										381.094	0.0612485	0.990217	0.00558942		260.17	0.0420674	0.959918	0.0390444
										377.43	0.0606596	0.989798	0.00523248		256.506	0.0414663	0.965794	0.028046
										373.765	0.0600706	0.989943	0.00547805		252.841	0.0408654	0.964443	0.0308947
										370.101	0.0594817	0.989917	0.00469383		249.177	0.0402645	0.966957	0.0269575
										366.437	0.0588929	0.989625	0.0049174		245.513	0.0396634	0.966604	0.0299655
										362.772	0.0583038	0.989307	0.00508777		241.848	0.0390625	0.963878	0.0335944
										359.108	0.057715	0.989763	0.00472573		238.184	0.0384615	0.960662	0.0389765
										355.444	0.0571261	0.989812	0.00530109		234.519	0.0378606	0.96583	0.0299147
										351.779	0.0565371	0.989642	0.0053166		230.855	0.0372597	0.969135	0.0267012
										348.115	0.0559482	0.989335	0.00502101		227.191	0.0366586	0.972375	0.0207185
										344.451	0.0553593	0.989546	0.0047453		223.526	0.0360577	0.97259	0.0222377
										340.786	0.0547703	0.990655	0.00372519		219.862	0.0354568	0.972695	0.0210365
										337.122	0.0541814	0.990519	0.00547234		216.198	0.0348557	0.972911	0.0191656
										333.457	0.0535924	0.990707	0.00681971		212.533	0.0342548	0.97163	0.0194048
										329.793	0.0530035	0.989806	0.00731953		208.869	0.0336539	0.970284	0.0232813
										326.129	0.0524147	0.989955	0.00707241		205.205	0.0330529	0.970311	0.023087
										322.464	0.0518256	0.98987	0.00746785		201.54	0.032452	0.964835	0.0298977
										318.8	0.0512368	0.989967	0.00705368		197.876	0.0318509	0.959238	0.0355722
										315.136	0.0506479	0.989975	0.00662222		194.211	0.03125	0.959625	0.0274747
										311.471	0.0500589	0.989855	0.00712935		190.547	0.0306491	0.951184	0.0299664
										307.807	0.04947	0.989307	0.00737262		186.883	0.030048	0.949088	0.0334896
										304.143	0.0488811	0.989481	0.00784939		183.218	0.0294471	0.945951	0.0234793
										300.478	0.0482921	0.988923	0.00829445		179.554	0.0288462	0.945365	0.0241616
										296.814	0.0477032	0.988952	0.00848274		175.89	0.0282452	0.95343	0.0206269
										293.149	0.0471142	0.989216	0.00793893		172.225	0.0276442	0.96095	0.0146079
										289.485	0.0465253	0.988739	0.00868588		168.561	0.0270433	0.970536	0.00279401
										285.821	0.0459365	0.988568	0.00849926		164.897	0.0264423	0.976621	0.00220864
										282.156	0.0453474	0.989296	0.00851686		161.232	0.0258414	0.980814	0.00270122
										278.492	0.0447586	0.988068	0.00791318		157.568	0.0252403	0.983138	0.00236671
										274.828	0.0441697	0.987862	0.00828811		153.903	0.0246394	0.984086	0.00164379
										271.163	0.0435807	0.98789	0.00754635		150.239	0.0240385	0.985202	0.00127493
										267.499	0.0429918	0.988646	0.00638031		146.575	0.0234374	0.985766	0.000378187
										263.834	0.0424028	0.988443	0.00681102		142.91	0.0228365	0.987706	0.00132183
										260.17	0.0418139	0.988421	0.00687748		139.246	0.0222356	0.98775	0.00372572
										256.506	0.041225	0.989089	0.00684957		135.582	0.0216346	0.987214	0.00653261
										252.841	0.040636	0.988713	0.00668371		131.917	0.0210337	0.98608	0.00791896
										249.177	0.0400471	0.988317	0.00587277		128.253	0.0204326	0.983945	0.00994037
										245.513	0.0394583	0.988546	0.00593382		124.588	0.0198317	0.979854	0.0148554
										241.848	0.0388692	0.988768	0.00557389		120.924	0.0192308	0.977284	0.0169297
										238.184	0.0382804	0.988524	0.00590511		117.26	0.0186297	0.980086	0.0131087
										234.52	0.0376915	0.988437	0.00597559		113.595	0.0180288	0.983404	0.010453
										230.855	0.0371025	0.989056	0.00515448		109.931	0.0174279	0.985176	0.00978654
										227.191	0.0365136	0.988971	0.00439151		106.267	0.0168269	0.985979	0.00950827
										223.526	0.0359246	0.989131	0.0051954		102.602	0.016226	0.985999	0.009689
										219.862	0.0353357	0.989714	0.00506492		98.938	0.0156251	0.985022	0.00995309
										216.198	0.0347468	0.989312	0.00530919		95.274	0.015024	0.983374	0.0104511
										212.533	0.0341578	0.98876	0.00609098		91.609	0.0144231	0.978307	0.0144006
										208.869	0.0335689	0.988091	0.00659994		87.945	0.013822	0.976833	0.0172103
										205.205	0.0329801	0.988032	0.0067376		84.28	0.0132211	0.973374	0.0187961
										201.54	0.032391	0.987954	0.0067067		80.616	0.0126202	0.970843	0.0210546
										197.876	0.0318022	0.987723	0.00675504		76.952	0.0120192	0.968398	0.0231544
										194.212	0.0312133	0.987613	0.00677708		73.287	0.0114183	0.964477	0.0265828
										190.547	0.0306243	0.98707	0.00708326		69.623	0.0108174	0.959628	0.0307162
										186.883	0.0300354	0.98774	0.00696978		65.959	0.0102163	0.954322	0.0354529
										183.218	0.0294464	0.987898	0.00732222		62.294	0.00961541	0.952815	0.0361016
										179.554	0.0288575	0.988117	0.00793473		58.63	0.0090145	0.950963	0.0367129
										175.89	0.0282686	0.987789	0.00848323		54.966	0.00841344	0.943802	0.0458054
										172.225	0.0276796	0.988718	0.00821338		51.301	0.00781254	0.94306	0.0468139
										168.561	0.0270907	0.988477	0.00879093		47.637	0.00721147	0.954307	0.0345661
										164.897	0.0265018	0.988518	0.00884258		43.972	0.00661057	0.96211	0.0270315
										161.232	0.0259128	0.988859	0.00822048		40.308	0.00600967	0.972793	0.0189295
										157.568	0.025324	0.98858	0.00908356		36.644	0.0054086	0.976392	0.0161346
										153.904	0.0247351	0.987979	0.0092212		32.979	0.0048077	0.97464	0.0172678
										150.239	0.0241461	0.98759	0.0100807		29.315	0.0042068	0.970209	0.0234339
										146.575	0.0235572	0.98806	0.0090956		25.651	0.00360574	0.969403	0.0266161
										142.91	0.0229682	0.987172	0.0101623		21.986	0.00300483	0.966314	0.030294
										139.246	0.0223793	0.986699	0.0109559		18.322	0.00240377	0.960747	0.0373647
										135.582	0.0217904	0.987791	0.010039		14.657	0.00180287	0.952602	0.0499201
										131.917	0.0212014	0.987185	0.0112084		10.993	0.00120197	0.943197	0.0606586
										128.253	0.0206125	0.987379	0.0105056		7.329	0.000600901	0.950081	0.0539086
										124.589	0.0200236	0.987588	0.011067		3.664	0	0.954294	0.0439499
										120.924	0.0194346	0.986656	0.0117666		0	0	0.960014	0.031766
										117.26	0.0188457	0.984801	0.0141589
										113.595	0.0182567	0.983585	0.0162207
										109.931	0.0176678	0.981246	0.0199458
										106.267	0.017079	0.980633	0.020652
										102.602	0.0164899	0.981242	0.0193436
										98.938	0.0159011	0.977895	0.0248323
										95.274	0.0153122	0.977313	0.0263987
										91.609	0.0147232	0.976236	0.0285904
										87.945	0.0141343	0.976856	0.0273033
										84.281	0.0135454	0.975329	0.0300097
										80.616	0.0129564	0.975667	0.028836
										76.952	0.0123675	0.976741	0.0260188
										73.287	0.0117785	0.976312	0.025856
										69.623	0.0111896	0.976911	0.0262509
										65.959	0.0106008	0.978094	0.0230963
										62.294	0.0100117	0.978506	0.0224637
										58.63	0.00942287	0.979163	0.0201043
										54.966	0.008834	0.978124	0.0209441
										51.301	0.00824497	0.977561	0.021339
										47.637	0.0076561	0.979104	0.0196043
										43.973	0.00706723	0.979648	0.0207352
										40.308	0.0064782	0.978915	0.0227327
										36.644	0.00588934	0.978836	0.0234672
										32.979	0.00530031	0.977034	0.0262867
										29.315	0.00471144	0.976623	0.0269577
										25.651	0.00412257	0.981785	0.0168482
										21.986	0.00353354	0.984055	0.0114217
										18.322	0.00294467	0.983633	0.0117706
										14.658	0.0023558	0.981205	0.0159622
										10.993	0.00176677	0.975073	0.0266767
										7.329	0.0011779	0.97682	0.021833
										3.665	0.00058903	0.975836	0.026284
										0	0	0.972978	0.0325711
