# Supplementary material for: EZ Clear for simple, rapid, and robust mouse whole organ clearing
Source: eLife. 2022 Oct 11;11:e77419. doi: 10.7554/eLife.77419 (PMC9555867; doi:10.7554/eLife.77419)
Supplement: Figure 4—source data 1. — Quantitative comparison of mean fluorescence intensity of To-Pro 3 and αSMA-Cy3 at different imaging depths (dorsal to ventral) between iDISCO and standard IHC processed samples. [file elife-77419-fig4-data1.xlsx]

## Sheet: To Pro3 Diffusion
		Region 1				Region 2
Distance_(pixels)	Distance (um)	IF	iDISCO		Distance (um)	IF	iDISCO
0	0	3	0		0	3	0
1	1.83	3	0		1.83	3	0
2	3.66	3	0		3.66	3	0
3	5.49	3	0		5.49	3	0
4	7.32	3	0		7.32	3	0
5	9.15	3	0		9.15	3	0
6	10.98	3	0		10.98	3	0
7	12.81	3	0		12.81	3	0
8	14.64	3	0		14.64	3	0
9	16.47	3	0		16.47	3	0
10	18.3	3	0		18.3	3	0
11	20.13	3	3		20.13	3	0
12	21.96	3	3		21.96	3	0
13	23.79	3	3		23.79	3	0
14	25.62	3	3		25.62	3	0
15	27.45	3	3		27.45	3	0
16	29.28	3	3		29.28	3	0
17	31.11	3	3		31.11	3	0
18	32.94	3	3		32.94	3	0
19	34.77	3	3		34.77	3	0
20	36.6	3	3		36.6	3	0
21	38.43	3	3		38.43	3	0
22	40.26	3	3		40.26	3	0
23	42.09	3	3		42.09	3	3
24	43.92	3	3		43.92	3	3
25	45.75	3	3		45.75	3	3
26	47.58	3	3		47.58	3	3
27	49.41	3	3		49.41	3	3
28	51.24	3	3		51.24	3	3
29	53.07	3	3		53.07	3	3
30	54.9	3	3		54.9	3	3
31	56.73	3	3		56.73	3	3
32	58.56	3	3		58.56	3	3
33	60.39	3	3		60.39	3	3
34	62.22	3	3		62.22	3	3
35	64.05	3	3		64.05	3	3
36	65.88	3	3		65.88	3	3
37	67.71	3	3		67.71	3	3
38	69.54	3	3		69.54	3	3
39	71.37	3	3		71.37	3	3
40	73.2	3	3		73.2	3	3
41	75.03	3	3		75.03	3	3
42	76.86	3	3		76.86	3	3
43	78.69	3	3		78.69	3	3
44	80.52	3	3		80.52	3	3
45	82.35	3	3		82.35	3	3
46	84.18	3	3		84.18	3	3
47	86.01	3	3		86.01	3	3
48	87.84	3	3		87.84	3	3
49	89.67	3	3		89.67	3	3
50	91.5	3	3		91.5	3	3
51	93.33	3	3		93.33	3	3
52	95.16	3	3		95.16	3	3
53	96.99	3	3		96.99	3	3
54	98.82	3	3		98.82	3	3
55	100.65	3	3		100.65	3	3
56	102.48	3	3		102.48	3	3
57	104.31	3	3		104.31	3	3
58	106.14	3	3		106.14	3	3
59	107.97	3	3		107.97	3	3
60	109.8	3	3		109.8	3	3
61	111.63	3	3		111.63	3	3
62	113.46	3	3		113.46	3	3
63	115.29	3	3		115.29	3	3
64	117.12	3	3		117.12	3	3
65	118.95	3	3		118.95	3	3
66	120.78	3	3		120.78	3	3
67	122.61	3	3		122.61	3	3
68	124.44	3	3		124.44	3	3
69	126.27	3	3		126.27	3	3
70	128.1	3	3		128.1	3	3
71	129.93	3	3		129.93	3	3
72	131.76	3	3		131.76	3	3
73	133.59	3	3		133.59	3	3
74	135.42	3	3		135.42	3	3
75	137.25	3	3		137.25	3	3
76	139.08	3	3		139.08	3	3
77	140.91	3	3		140.91	3	3
78	142.74	3	3		142.74	3	3
79	144.57	3	3		144.57	3	3
80	146.4	3	3		146.4	3	3
81	148.23	3	3		148.23	3	3
82	150.06	3	3		150.06	3	3
83	151.89	3	3		151.89	3	3
84	153.72	3	3		153.72	3	3
85	155.55	3	3		155.55	3	3
86	157.38	3	3		157.38	3	3
87	159.21	3	3		159.21	3	3
88	161.04	3	3		161.04	3	3
89	162.87	3	3		162.87	3	3
90	164.7	3	3		164.7	3	3
91	166.53	3	3		166.53	3	3
92	168.36	3	3		168.36	3	3
93	170.19	3	3		170.19	3	3
94	172.02	3	3		172.02	3	3
95	173.85	3	3		173.85	3	3
96	175.68	3	3		175.68	3	3
97	177.51	3	3		177.51	3	3
98	179.34	3	3		179.34	3	3
99	181.17	3	3		181.17	3	3
100	183	3	3		183	3	3
101	184.83	3	3		184.83	3	3
102	186.66	3	3		186.66	3	3
103	188.49	3	3		188.49	3	3
104	190.32	3	3		190.32	3	3
105	192.15	3	3		192.15	3	3
106	193.98	3	3		193.98	3	3
107	195.81	3	3		195.81	3	3
108	197.64	3	3		197.64	3	3
109	199.47	3	3		199.47	3	3
110	201.3	3	3		201.3	3	3
111	203.13	3	3		203.13	3	3
112	204.96	3	3		204.96	3	3
113	206.79	3	3		206.79	3	3
114	208.62	3	3		208.62	3	3
115	210.45	3	3		210.45	3	3
116	212.28	3	3		212.28	3	3
117	214.11	3	3		214.11	3	3
118	215.94	3	3		215.94	3	3
119	217.77	3	3		217.77	3	3
120	219.6	3	3		219.6	3	3
121	221.43	3	3		221.43	3	3
122	223.26	3	3		223.26	3	3
123	225.09	3	3		225.09	3	3
124	226.92	3	3		226.92	3	3
125	228.75	3	3		228.75	3	3
126	230.58	3	3		230.58	3	3
127	232.41	3	3		232.41	3	3
128	234.24	3	3		234.24	3	3
129	236.07	3	3		236.07	3	3
130	237.9	3	3		237.9	3	3
131	239.73	3	3		239.73	3	3
132	241.56	3	3		241.56	3	3
133	243.39	3	3		243.39	3	3
134	245.22	3	3		245.22	3	3
135	247.05	3	3		247.05	3	3
136	248.88	3	3		248.88	3	3
137	250.71	3	3		250.71	3	3
138	252.54	3	3		252.54	3	3
139	254.37	3	3		254.37	3	3
140	256.2	3	3		256.2	3	3
141	258.03	3	3		258.03	3	3
142	259.86	3	3		259.86	3	3
143	261.69	3	3		261.69	3	3
144	263.52	3	3		263.52	3	3
145	265.35	3	3		265.35	3	3
146	267.18	3	3		267.18	3	3
147	269.01	3	3		269.01	3	3
148	270.84	3	3		270.84	3	3
149	272.67	3	3		272.67	3	3
150	274.5	3	3		274.5	3	3
151	276.33	3	3		276.33	3	3
152	278.16	3	3		278.16	3	3
153	279.99	3	3		279.99	3	3
154	281.82	3	3		281.82	3	3
155	283.65	3	3		283.65	3	3
156	285.48	3	3		285.48	3	3
157	287.31	3	3		287.31	3	3
158	289.14	3	3		289.14	3	3
159	290.97	3	3		290.97	3	3
160	292.8	3	3		292.8	3	3
161	294.63	3	3		294.63	3	3
162	296.46	3	3		296.46	3	3
163	298.29	3	3		298.29	3	3
164	300.12	3	3		300.12	3	3
165	301.95	3	3		301.95	3	3
166	303.78	3	3		303.78	3	3
167	305.61	3	3		305.61	3	3
168	307.44	3	3		307.44	3	3
169	309.27	3	3		309.27	3	3
170	311.1	3	3		311.1	3	3
171	312.93	3	3		312.93	3	3
172	314.76	3	3		314.76	3	3
173	316.59	3	3		316.59	3	3
174	318.42	3	3		318.42	3	3
175	320.25	3	3		320.25	3	3
176	322.08	3	3		322.08	3	3
177	323.91	3	3		323.91	3	3
178	325.74	3	3		325.74	3	3
179	327.57	3	3		327.57	3	3
180	329.4	3	3		329.4	3	3
181	331.23	3	3		331.23	3	3
182	333.06	3	3		333.06	3	3
183	334.89	3	3		334.89	3	3
184	336.72	3	3		336.72	3	3
185	338.55	3	3		338.55	3	3
186	340.38	3	3		340.38	3	3
187	342.21	3	3		342.21	3	3
188	344.04	3	3		344.04	3	3
189	345.87	3	3		345.87	3	3
190	347.7	3	3		347.7	3	3
191	349.53	3	3		349.53	3	3
192	351.36	3	3		351.36	3	3
193	353.19	3	3		353.19	3	3
194	355.02	3	3		355.02	3	3
195	356.85	3	3		356.85	3	3
196	358.68	3	3		358.68	3	3
197	360.51	3	3		360.51	3	3
198	362.34	3	3		362.34	3	3
199	364.17	3	3		364.17	3	3
200	366	3	3		366	3	3
201	367.83	3	3		367.83	3	3
202	369.66	3	3		369.66	3	3
203	371.49	3	3		371.49	3	3
204	373.32	3	3		373.32	3	3
205	375.15	3	3		375.15	3	3
206	376.98	3	3		376.98	3	3
207	378.81	3	3		378.81	3	3
208	380.64	3	3		380.64	3	3
209	382.47	3	3		382.47	3	3
210	384.3	3	3		384.3	3	3
211	386.13	3	3		386.13	3	3
212	387.96	3	3		387.96	3	3
213	389.79	3	3		389.79	3	3
214	391.62	3	3		391.62	3	3
215	393.45	3	3		393.45	3	3
216	395.28	3	3		395.28	3	3
217	397.11	3	3		397.11	3	3
218	398.94	3	3		398.94	3	3
219	400.77	3	3		400.77	3	3
220	402.6	3	3		402.6	3	3
221	404.43	3	3		404.43	3	3
222	406.26	3	3		406.26	3	3
223	408.09	3	3		408.09	3	3
224	409.92	3	3		409.92	3	3
225	411.75	3	3		411.75	3	3
226	413.58	3	3		413.58	3	3
227	415.41	3	3		415.41	3	3
228	417.24	3	3		417.24	3	3
229	419.07	3	3		419.07	3	3
230	420.9	3	3		420.9	3	3
231	422.73	3	3		422.73	3	3
232	424.56	3	3		424.56	3	3
233	426.39	3	3		426.39	3	3
234	428.22	3	3		428.22	3	3
235	430.05	3	3		430.05	3	3
236	431.88	3	3		431.88	3	3
237	433.71	3	3		433.71	3	3
238	435.54	3	3		435.54	3	3
239	437.37	3	3		437.37	3	3
240	439.2	3	3		439.2	3	3
241	441.03	3	3		441.03	3	3
242	442.86	3	3		442.86	3	3
243	444.69	3	3		444.69	3	3
244	446.52	3	3		446.52	3	3
245	448.35	3	3		448.35	3	3
246	450.18	3	3		450.18	3	3
247	452.01	3	3		452.01	3	3
248	453.84	3	3		453.84	3	3
249	455.67	3	3		455.67	3	3
250	457.5	3	3		457.5	3	3
251	459.33	3	3		459.33	3	3
252	461.16	3	3		461.16	3	3
253	462.99	3	3		462.99	3	3
254	464.82	3	3		464.82	3	3
255	466.65	3	3		466.65	3	3
256	468.48	3	3		468.48	3	3
257	470.31	3	3		470.31	3	3
258	472.14	3	3		472.14	3	3
259	473.97	3	3		473.97	3	3
260	475.8	3	3		475.8	3	3
261	477.63	3	3		477.63	3	3
262	479.46	3	3		479.46	3	3
263	481.29	3	3		481.29	3	3
264	483.12	3	3		483.12	3	3
265	484.95	3	3		484.95	3	3
266	486.78	3	3		486.78	3	3
267	488.61	3	3		488.61	3	3
268	490.44	3	3		490.44	3	3
269	492.27	3	3		492.27	3	3
270	494.1	3	3		494.1	3	3
271	495.93	3	3		495.93	3	3
272	497.76	3	3		497.76	3	3
273	499.59	3	3		499.59	3	3
274	501.42	3	3		501.42	3	3
275	503.25	3	3		503.25	3	3
276	505.08	3	3		505.08	3	3
277	506.91	3	3		506.91	3	3
278	508.74	3	3		508.74	3	3
279	510.57	3	3		510.57	3	3
280	512.4	3	3		512.4	3	3
281	514.23	3	3		514.23	3	3
282	516.06	3	3		516.06	3	3
283	517.89	3	3		517.89	3	3
284	519.72	3	3		519.72	3	3
285	521.55	3	3		521.55	3	3
286	523.38	3	3		523.38	3	3
287	525.21	3	3		525.21	3	3
288	527.04	3	3		527.04	3	3
289	528.87	3	3		528.87	3	3
290	530.7	3	3		530.7	3	3
291	532.53	3	3		532.53	3	3
292	534.36	3	3		534.36	3	3
293	536.19	3	3		536.19	3	3
294	538.02	3	3		538.02	3	3
295	539.85	3	3		539.85	3	3
296	541.68	3	3		541.68	3	3
297	543.51	3	3		543.51	3	3
298	545.34	3	3		545.34	3	3
299	547.17	3	3		547.17	3	3
300	549	3	3		549	3	3
301	550.83	3	3		550.83	3	3
302	552.66	3	3		552.66	3	3
303	554.49	3	3		554.49	3	3
304	556.32	3	3		556.32	3	3
305	558.15	3	3		558.15	3	3
306	559.98	3	3		559.98	3	3
307	561.81	3	3		561.81	3	3
308	563.64	3	3		563.64	3	3
309	565.47	3	3		565.47	3	3
310	567.3	3	3		567.3	3	3
311	569.13	3	3		569.13	3	3
312	570.96	3	3		570.96	3	3
313	572.79	3	3		572.79	3	3
314	574.62	3	3		574.62	3	3
315	576.45	3	3		576.45	3	3
316	578.28	3	3		578.28	3	3
317	580.11	3	3		580.11	3	3
318	581.94	3	3		581.94	3	3
319	583.77	3	3		583.77	3	3
320	585.6	3	3		585.6	3	3
321	587.43	3	3		587.43	3	3
322	589.26	3	3		589.26	3	3
323	591.09	3	3		591.09	3	3
324	592.92	3	3		592.92	3	3
325	594.75	3	3		594.75	3	3
326	596.58	3	3		596.58	3	3
327	598.41	3	3		598.41	3	3
328	600.24	3	3		600.24	3	3
329	602.07	3	3		602.07	6	3
330	603.9	3	3		603.9	6	3
331	605.73	3	3		605.73	9	3
332	607.56	3	3		607.56	9	3
333	609.39	3	3		609.39	9	3
334	611.22	3	3		611.22	6	3
335	613.05	3	3		613.05	6	3
336	614.88	3	3		614.88	6	3
337	616.71	3	3		616.71	6	3
338	618.54	3	3		618.54	6	3
339	620.37	3	3		620.37	6	3
340	622.2	3	3		622.2	6	3
341	624.03	3	3		624.03	6	3
342	625.86	3	3		625.86	9	3
343	627.69	3	3		627.69	9	3
344	629.52	3	3		629.52	12	3
345	631.35	3	3		631.35	15	3
346	633.18	3	3		633.18	15	3
347	635.01	3	3		635.01	12	3
348	636.84	3	3		636.84	9	3
349	638.67	3	3		638.67	9	3
350	640.5	3	3		640.5	13	3
351	642.33	3	3		642.33	13	3
352	644.16	3	3		644.16	13	3
353	645.99	3	3		645.99	13	3
354	647.82	3	3		647.82	13	3
355	649.65	3	3		649.65	13	3
356	651.48	3	3		651.48	13	3
357	653.31	3	3		653.31	13	3
358	655.14	3	3		655.14	16	3
359	656.97	3	3		656.97	19	3
360	658.8	3	3		658.8	19	3
361	660.63	3	3		660.63	19	3
362	662.46	3	3		662.46	22.3333	3
363	664.29	3	3		664.29	22.3333	3
364	666.12	3	3		666.12	22.3333	3
365	667.95	3	3		667.95	22.3333	3
366	669.78	3	3		669.78	27.6667	3
367	671.61	3	3		671.61	27.6667	3
368	673.44	3	3		673.44	27.6667	3
369	675.27	3	3		675.27	27.6667	3
370	677.1	3	3		677.1	27.6667	3
371	678.93	3	3		678.93	27.6667	3
372	680.76	3	3		680.76	27.6667	3
373	682.59	3	3		682.59	27.6667	3
374	684.42	3	3		684.42	27.6667	3
375	686.25	3	3		686.25	27.6667	3
376	688.08	3	3		688.08	27.6667	3
377	689.91	3	3		689.91	27.6667	3
378	691.74	3	3		691.74	27.6667	3
379	693.57	3	3		693.57	27.6667	3
380	695.4	3	3		695.4	27.6667	3
381	697.23	3	3		697.23	27.6667	3
382	699.06	3	3		699.06	27.6667	3
383	700.89	3	3		700.89	27.6667	3
384	702.72	3	3		702.72	27.6667	3
385	704.55	3	3		704.55	27.6667	3
386	706.38	3	3		706.38	27.6667	3
387	708.21	3	3		708.21	27.6667	3
388	710.04	3	3		710.04	27.6667	3
389	711.87	3	3		711.87	27.6667	3
390	713.7	3	3		713.7	30.6667	3
391	715.53	3	3		715.53	30.6667	3
392	717.36	3	3		717.36	30.6667	3
393	719.19	3	3		719.19	30.6667	3
394	721.02	3	3		721.02	30.6667	3
395	722.85	3	3		722.85	30.6667	3
396	724.68	3	3		724.68	30.6667	3
397	726.51	3	3		726.51	30.6667	3
398	728.34	3	3		728.34	27.6667	3
399	730.17	3	3		730.17	30.6667	3
400	732	3	6		732	30.6667	3
401	733.83	3	6		733.83	33.6667	3
402	735.66	3	6		735.66	33.6667	3
403	737.49	3	6		737.49	30.6667	3
404	739.32	3	6		739.32	30.6667	3
405	741.15	3	6		741.15	27.6667	3
406	742.98	3	6		742.98	27.6667	3
407	744.81	3	6		744.81	27.6667	3
408	746.64	3	6		746.64	24.6667	3
409	748.47	3	6		748.47	24.6667	3
410	750.3	3	6		750.3	24.6667	3
411	752.13	3	6		752.13	21.3333	3
412	753.96	3	6		753.96	21.3333	3
413	755.79	3	6		755.79	21.3333	3
414	757.62	3	6		757.62	21.3333	3
415	759.45	3	6		759.45	21.3333	3
416	761.28	3	6		761.28	21.3333	3
417	763.11	3	6		763.11	21.3333	3
418	764.94	3	6		764.94	21.3333	3
419	766.77	3	10		766.77	21.3333	3
420	768.6	3	10		768.6	21.3333	3
421	770.43	3	13		770.43	21.3333	3
422	772.26	3	13		772.26	18	3
423	774.09	3	13		774.09	18	3
424	775.92	3	14.3333		775.92	18	3
425	777.75	3	16.3333		777.75	18	3
426	779.58	3	19.6667		779.58	18	3
427	781.41	3	23		781.41	18	3
428	783.24	3	23		783.24	18	3
429	785.07	3	23		785.07	18	3
430	786.9	3	23		786.9	16	3
431	788.73	3	19.6667		788.73	16	3
432	790.56	3	23		790.56	16	3
433	792.39	3	23		792.39	16	3
434	794.22	3	23		794.22	16	3
435	796.05	3	26.3333		796.05	16	3
436	797.88	3	26.3333		797.88	16	6.3333
437	799.71	3	30		799.71	16	6.3333
438	801.54	3	30		801.54	16	6.3333
439	803.37	3	30		803.37	16	6.3333
440	805.2	3	30		805.2	16	6.3333
441	807.03	3	30		807.03	16	6.3333
442	808.86	3	30		808.86	16	6.3333
443	810.69	3	33.3333		810.69	16	6.3333
444	812.52	3	33.3333		812.52	16	13
445	814.35	3	36.3333		814.35	16	13
446	816.18	3	36.3333		816.18	18	13
447	818.01	3	36.3333		818.01	15	16.3333
448	819.84	3	36.3333		819.84	15	16.3333
449	821.67	3	36.3333		821.67	15	19.6667
450	823.5	3	36.3333		823.5	15	19.6667
451	825.33	3	36.3333		825.33	18	19.6667
452	827.16	3	36.3333		827.16	21.3333	20.6667
453	828.99	3	36.3333		828.99	24.6667	20.6667
454	830.82	6	36.3333		830.82	24.6667	20.6667
455	832.65	6	36.3333		832.65	21.3333	17.3333
456	834.48	6	33.3333		834.48	21.3333	17.3333
457	836.31	6	33.3333		836.31	18	14.3333
458	838.14	6	33.3333		838.14	18	14.3333
459	839.97	6	33.3333		839.97	21.3333	14.3333
460	841.8	6	33.3333		841.8	21.3333	10.6667
461	843.63	6	33.3333		843.63	24.6667	10.6667
462	845.46	6	33.3333		845.46	24.6667	10.6667
463	847.29	6	33.3333		847.29	21.3333	10.6667
464	849.12	6	30		849.12	21.3333	10.6667
465	850.95	6	30		850.95	18	10.6667
466	852.78	6	30		852.78	18	10.6667
467	854.61	6	30		854.61	21.3333	10.6667
468	856.44	6	30		856.44	21.3333	6.3333
469	858.27	6	30		858.27	24.6667	6.3333
470	860.1	6	30		860.1	24.6667	6.3333
471	861.93	6	30		861.93	24.6667	6.3333
472	863.76	6	30		863.76	24.6667	6.3333
473	865.59	6	30		865.59	24.6667	6.3333
474	867.42	6	30		867.42	24.6667	6.3333
475	869.25	6	30		869.25	24.6667	6.3333
476	871.08	6	30		871.08	24.6667	9.6667
477	872.91	6	30		872.91	24.6667	9.6667
478	874.74	6	30		874.74	24.6667	9.6667
479	876.57	6	30		876.57	24.6667	9.6667
480	878.4	6	36.3333		878.4	24.6667	9.6667
481	880.23	6	36.3333		880.23	21.3333	9.6667
482	882.06	6	40		882.06	21.3333	9.6667
483	883.89	6	43.3333		883.89	18	9.6667
484	885.72	6	43.3333		885.72	18	15.3333
485	887.55	6	46.3333		887.55	18	12
486	889.38	6	50.3333		889.38	24.6667	12
487	891.21	6	49		891.21	24.6667	8.3333
488	893.04	6	54.6667		893.04	24.6667	8.3333
489	894.87	6	58		894.87	21.3333	12
490	896.7	6	61.3333		896.7	21.3333	10.6667
491	898.53	6	64.6667		898.53	18	14.3333
492	900.36	6	64.6667		900.36	18	17.3333
493	902.19	6	64.6667		902.19	18	17.3333
494	904.02	9	64.6667		904.02	18	19.6667
495	905.85	6	61.3333		905.85	18	26.3333
496	907.68	6	56		907.68	18	33.3333
497	909.51	6	52.3333		909.51	18	36.3333
498	911.34	6	45.3333		911.34	18	40
499	913.17	9	42		913.17	18	43.3333
500	915	12	40		915	18	45.3333
501	916.83	15	36.3333		916.83	18	45.3333
502	918.66	15	36.3333		918.66	18	49
503	920.49	12	36.3333		920.49	21.3333	52.3333
504	922.32	12	33.3333		922.32	21.3333	52.3333
505	924.15	9	33.3333		924.15	21.3333	49
506	925.98	9	33.3333		925.98	21.3333	45.3333
507	927.81	12	33.3333		927.81	21.3333	45.3333
508	929.64	12	33.3333		929.64	21.3333	45.3333
509	931.47	15	33.3333		931.47	21.3333	45.3333
510	933.3	16	33.3333		933.3	24.6667	45.3333
511	935.13	12	33.3333		935.13	24.6667	42
512	936.96	12	40		936.96	24.6667	42
513	938.79	12	36.3333		938.79	24.6667	39
514	940.62	15	36.3333		940.62	24.6667	39
515	942.45	21.3333	33.3333		942.45	21.3333	39
516	944.28	27.6667	33.3333		944.28	18	33.3333
517	946.11	30.6667	36.3333		946.11	15	33.3333
518	947.94	27.6667	36.3333		947.94	18	30
519	949.77	27.6667	40		949.77	18	33.3333
520	951.6	27.6667	40		951.6	18	35.3333
521	953.43	24.6667	40		953.43	21.3333	42
522	955.26	24.6667	40		955.26	21.3333	49
523	957.09	21.3333	40		957.09	24.6667	56
524	958.92	21.3333	40		958.92	24.6667	54.6667
525	960.75	21.3333	40		960.75	24.6667	58
526	962.58	24.6667	40		962.58	24.6667	61.3333
527	964.41	24.6667	40		964.41	21.3333	64.6667
528	966.24	24.6667	46.3333		966.24	21.3333	64.6667
529	968.07	24.6667	46.3333		968.07	18	64.6667
530	969.9	24.6667	43.3333		969.9	18	64.6667
531	971.73	24.6667	43.3333		971.73	21.3333	61.3333
532	973.56	24.6667	40		973.56	21.3333	66
533	975.39	24.6667	36.3333		975.39	24.6667	59
534	977.22	27.6667	36.3333		977.22	24.6667	49
535	979.05	27.6667	36.3333		979.05	24.6667	39
536	980.88	27.6667	40		980.88	24.6667	33.3333
537	982.71	27.6667	40		982.71	24.6667	30
538	984.54	27.6667	40		984.54	24.6667	26.3333
539	986.37	27.6667	40		986.37	24.6667	30
540	988.2	27.6667	40		988.2	24.6667	23
541	990.03	27.6667	40		990.03	24.6667	23
542	991.86	27.6667	40		991.86	27.6667	24.3333
543	993.69	27.6667	40		993.69	27.6667	24.3333
544	995.52	27.6667	36.3333		995.52	27.6667	24.3333
545	997.35	27.6667	36.3333		997.35	24.6667	24.3333
546	999.18	27.6667	40		999.18	24.6667	24.3333
547	1001.01	27.6667	43.3333		1001.01	21.3333	24.3333
548	1002.84	27.6667	43.3333		1002.84	21.3333	26.3333
549	1004.67	27.6667	43.3333		1004.67	21.3333	26.3333
550	1006.5	27.6667	40		1006.5	21.3333	26.3333
551	1008.33	30.6667	36.3333		1008.33	21.3333	26.3333
552	1010.16	30.6667	36.3333		1010.16	21.3333	26.3333
553	1011.99	33.6667	36.3333		1011.99	21.3333	26.3333
554	1013.82	33.6667	36.3333		1013.82	21.3333	26.3333
555	1015.65	30.6667	40		1015.65	21.3333	26.3333
556	1017.48	30.6667	40		1017.48	21.3333	30
557	1019.31	27.6667	43.3333		1019.31	21.3333	30
558	1021.14	27.6667	43.3333		1021.14	27.6667	30
559	1022.97	27.6667	43.3333		1022.97	27.6667	30
560	1024.8	27.6667	36.3333		1024.8	27.6667	30
561	1026.63	27.6667	36.3333		1026.63	27.6667	30
562	1028.46	27.6667	36.3333		1028.46	27.6667	30
563	1030.29	27.6667	36.3333		1030.29	27.6667	30
564	1032.12	27.6667	36.3333		1032.12	27.6667	26.3333
565	1033.95	27.6667	36.3333		1033.95	27.6667	26.3333
566	1035.78	24.6667	36.3333		1035.78	24.6667	26.3333
567	1037.61	27.6667	36.3333		1037.61	24.6667	26.3333
568	1039.44	27.6667	33.3333		1039.44	24.6667	26.3333
569	1041.27	30.6667	33.3333		1041.27	24.6667	26.3333
570	1043.1	30.6667	33.3333		1043.1	24.6667	26.3333
571	1044.93	27.6667	33.3333		1044.93	24.6667	26.3333
572	1046.76	27.6667	33.3333		1046.76	24.6667	26.3333
573	1048.59	24.6667	33.3333		1048.59	24.6667	26.3333
574	1050.42	27.6667	33.3333		1050.42	24.6667	26.3333
575	1052.25	27.6667	33.3333		1052.25	24.6667	26.3333
576	1054.08	30.6667	36.3333		1054.08	24.6667	26.3333
577	1055.91	33.6667	36.3333		1055.91	24.6667	26.3333
578	1057.74	33.6667	36.3333		1057.74	24.6667	26.3333
579	1059.57	36.6667	36.3333		1059.57	24.6667	26.3333
580	1061.4	40	36.3333		1061.4	24.6667	19.6667
581	1063.23	40	36.3333		1063.23	24.6667	19.6667
582	1065.06	36.6667	36.3333		1065.06	24.6667	19.6667
583	1066.89	36.6667	36.3333		1066.89	24.6667	23
584	1068.72	36.6667	36.3333		1068.72	24.6667	23
585	1070.55	36.6667	36.3333		1070.55	24.6667	23
586	1072.38	36.6667	40		1072.38	24.6667	26.3333
587	1074.21	36.6667	40		1074.21	24.6667	26.3333
588	1076.04	36.6667	40		1076.04	24.6667	30
589	1077.87	36.6667	43.3333		1077.87	24.6667	30
590	1079.7	33.6667	43.3333		1079.7	27.6667	30
591	1081.53	33.6667	43.3333		1081.53	27.6667	26.3333
592	1083.36	33.6667	40		1083.36	27.6667	26.3333
593	1085.19	30.6667	40		1085.19	27.6667	23
594	1087.02	30.6667	40		1087.02	27.6667	23
595	1088.85	27.6667	36.3333		1088.85	27.6667	23
596	1090.68	27.6667	36.3333		1090.68	27.6667	23
597	1092.51	27.6667	33.3333		1092.51	27.6667	26.3333
598	1094.34	33.6667	33.3333		1094.34	30.6667	26.3333
599	1096.17	33.6667	33.3333		1096.17	30.6667	26.3333
600	1098	33.6667	30		1098	30.6667	26.3333
601	1099.83	33.6667	30		1099.83	27.6667	30
602	1101.66	33.6667	30		1101.66	27.6667	30
603	1103.49	33.6667	30		1103.49	24.6667	30
604	1105.32	33.6667	30		1105.32	24.6667	33.3333
605	1107.15	33.6667	30		1107.15	24.6667	36.3333
606	1108.98	27.6667	30		1108.98	27.6667	40
607	1110.81	27.6667	30		1110.81	24.6667	43.3333
608	1112.64	27.6667	33.3333		1112.64	24.6667	40
609	1114.47	27.6667	36.3333		1114.47	24.6667	36.3333
610	1116.3	27.6667	36.3333		1116.3	24.6667	30
611	1118.13	27.6667	40		1118.13	27.6667	26.3333
612	1119.96	27.6667	40		1119.96	30.6667	30
613	1121.79	27.6667	36.3333		1121.79	33.6667	30
614	1123.62	30.6667	36.3333		1123.62	33.6667	30
615	1125.45	30.6667	33.3333		1125.45	33.6667	30
616	1127.28	30.6667	33.3333		1127.28	30.6667	30
617	1129.11	33.6667	33.3333		1129.11	30.6667	30
618	1130.94	33.6667	33.3333		1130.94	30.6667	30
619	1132.77	36.6667	33.3333		1132.77	30.6667	30
620	1134.6	36.6667	33.3333		1134.6	27.6667	30
621	1136.43	36.6667	33.3333		1136.43	27.6667	30
622	1138.26	40	33.3333		1138.26	27.6667	30
623	1140.09	40	33.3333		1140.09	27.6667	30
624	1141.92	40	33.3333		1141.92	27.6667	30
625	1143.75	40	33.3333		1143.75	27.6667	30
626	1145.58	40	33.3333		1145.58	27.6667	30
627	1147.41	40	33.3333		1147.41	27.6667	30
628	1149.24	40	33.3333		1149.24	27.6667	30
629	1151.07	40	33.3333		1151.07	27.6667	33.3333
630	1152.9	40	33.3333		1152.9	30.6667	33.3333
631	1154.73	40	30		1154.73	30.6667	33.3333
632	1156.56	40	36.3333		1156.56	30.6667	33.3333
633	1158.39	36.6667	33.3333		1158.39	30.6667	33.3333
634	1160.22	36.6667	30		1160.22	30.6667	33.3333
635	1162.05	33.6667	30		1162.05	30.6667	33.3333
636	1163.88	33.6667	30		1163.88	30.6667	33.3333
637	1165.71	33.6667	33.3333		1165.71	30.6667	33.3333
638	1167.54	33.6667	36.3333		1167.54	36.6667	33.3333
639	1169.37	33.6667	36.3333		1169.37	33.6667	30
640	1171.2	33.6667	40		1171.2	33.6667	30
641	1173.03	33.6667	40		1173.03	33.6667	26.3333
642	1174.86	33.6667	40		1174.86	33.6667	26.3333
643	1176.69	33.6667	40		1176.69	33.6667	26.3333
644	1178.52	33.6667	40		1178.52	33.6667	26.3333
645	1180.35	33.6667	40		1180.35	33.6667	26.3333
646	1182.18	33.6667	40		1182.18	40	26.3333
647	1184.01	30.6667	40		1184.01	40	26.3333
648	1185.84	30.6667	43.3333		1185.84	36.6667	26.3333
649	1187.67	27.6667	46.3333		1187.67	33.6667	26.3333
650	1189.5	27.6667	46.3333		1189.5	30.6667	26.3333
651	1191.33	30.6667	50.3333		1191.33	27.6667	26.3333
652	1193.16	30.6667	50.3333		1193.16	27.6667	26.3333
653	1194.99	33.6667	46.3333		1194.99	24.6667	26.3333
654	1196.82	33.6667	46.3333		1196.82	33.6667	26.3333
655	1198.65	33.6667	43.3333		1198.65	30.6667	30
656	1200.48	33.6667	40		1200.48	27.6667	30
657	1202.31	33.6667	40		1202.31	27.6667	33.3333
658	1204.14	33.6667	40		1204.14	27.6667	33.3333
659	1205.97	33.6667	36.3333		1205.97	27.6667	33.3333
660	1207.8	33.6667	36.3333		1207.8	30.6667	40
661	1209.63	33.6667	33.3333		1209.63	33.6667	40
662	1211.46	36.6667	33.3333		1211.46	30.6667	40
663	1213.29	36.6667	33.3333		1213.29	30.6667	36.3333
664	1215.12	33.6667	36.3333		1215.12	30.6667	36.3333
665	1216.95	33.6667	36.3333		1216.95	30.6667	36.3333
666	1218.78	33.6667	36.3333		1218.78	30.6667	33.3333
667	1220.61	36.6667	36.3333		1220.61	30.6667	33.3333
668	1222.44	40	36.3333		1222.44	30.6667	43.3333
669	1224.27	40	36.3333		1224.27	30.6667	43.3333
670	1226.1	52.6667	36.3333		1226.1	36.6667	43.3333
671	1227.93	49.6667	36.3333		1227.93	36.6667	43.3333
672	1229.76	49.6667	36.3333		1229.76	40	43.3333
673	1231.59	49.6667	36.3333		1231.59	40	43.3333
674	1233.42	46.6667	40		1233.42	40	43.3333
675	1235.25	43	40		1235.25	36.6667	43.3333
676	1237.08	43	40		1237.08	36.6667	43.3333
677	1238.91	43	43.3333		1238.91	33.6667	43.3333
678	1240.74	33.6667	43.3333		1240.74	30.6667	43.3333
679	1242.57	33.6667	43.3333		1242.57	30.6667	40
680	1244.4	33.6667	46.3333		1244.4	30.6667	40
681	1246.23	33.6667	43.3333		1246.23	30.6667	36.3333
682	1248.06	33.6667	43.3333		1248.06	30.6667	36.3333
683	1249.89	33.6667	43.3333		1249.89	30.6667	36.3333
684	1251.72	33.6667	40		1251.72	30.6667	43.3333
685	1253.55	33.6667	40		1253.55	27.6667	43.3333
686	1255.38	30.6667	36.3333		1255.38	27.6667	43.3333
687	1257.21	30.6667	36.3333		1257.21	27.6667	40
688	1259.04	30.6667	46.3333		1259.04	27.6667	40
689	1260.87	30.6667	43.3333		1260.87	30.6667	36.3333
690	1262.7	30.6667	43.3333		1262.7	30.6667	36.3333
691	1264.53	30.6667	40		1264.53	30.6667	36.3333
692	1266.36	30.6667	40		1266.36	33.6667	33.3333
693	1268.19	30.6667	36.3333		1268.19	33.6667	33.3333
694	1270.02	36.6667	36.3333		1270.02	27.6667	33.3333
695	1271.85	36.6667	33.3333		1271.85	30.6667	36.3333
696	1273.68	36.6667	36.3333		1273.68	30.6667	36.3333
697	1275.51	36.6667	36.3333		1275.51	30.6667	40
698	1277.34	36.6667	36.3333		1277.34	30.6667	40
699	1279.17	36.6667	36.3333		1279.17	30.6667	40
700	1281	36.6667	36.3333		1281	30.6667	36.3333
701	1282.83	36.6667	36.3333		1282.83	27.6667	36.3333
702	1284.66	36.6667	36.3333		1284.66	30.6667	36.3333
703	1286.49	36.6667	36.3333		1286.49	33.6667	36.3333
704	1288.32	36.6667	33.3333		1288.32	33.6667	36.3333
705	1290.15	36.6667	33.3333		1290.15	36.6667	36.3333
706	1291.98	36.6667	33.3333		1291.98	36.6667	36.3333
707	1293.81	36.6667	33.3333		1293.81	33.6667	36.3333
708	1295.64	36.6667	33.3333		1295.64	33.6667	43.3333
709	1297.47	36.6667	33.3333		1297.47	30.6667	43.3333
710	1299.3	36.6667	33.3333		1299.3	27.6667	40
711	1301.13	36.6667	33.3333		1301.13	27.6667	36.3333
712	1302.96	36.6667	43.3333		1302.96	27.6667	36.3333
713	1304.79	36.6667	43.3333		1304.79	30.6667	36.3333
714	1306.62	36.6667	43.3333		1306.62	30.6667	36.3333
715	1308.45	36.6667	43.3333		1308.45	33.6667	40
716	1310.28	36.6667	43.3333		1310.28	33.6667	43.3333
717	1312.11	36.6667	43.3333		1312.11	33.6667	43.3333
718	1313.94	36.6667	43.3333		1313.94	33.6667	40
719	1315.77	40	43.3333		1315.77	33.6667	40
720	1317.6	40	40		1317.6	33.6667	40
721	1319.43	43	40		1319.43	33.6667	40
722	1321.26	43	40		1321.26	33.6667	43.3333
723	1323.09	40	40		1323.09	33.6667	43.3333
724	1324.92	40	40		1324.92	33.6667	57
725	1326.75	36.6667	40		1326.75	33.6667	57
726	1328.58	36.6667	40		1328.58	33.6667	53.3333
727	1330.41	36.6667	40		1330.41	33.6667	50.3333
728	1332.24	36.6667	43.3333		1332.24	33.6667	46.3333
729	1334.07	36.6667	46.3333		1334.07	30.6667	43.3333
730	1335.9	36.6667	46.3333		1335.9	30.6667	40
731	1337.73	36.6667	50.3333		1337.73	27.6667	36.3333
732	1339.56	36.6667	50.3333		1339.56	27.6667	43.3333
733	1341.39	36.6667	46.3333		1341.39	27.6667	43.3333
734	1343.22	38.6667	46.3333		1343.22	30.6667	43.3333
735	1345.05	38.6667	43.3333		1345.05	30.6667	46.3333
736	1346.88	38.6667	43.3333		1346.88	30.6667	46.3333
737	1348.71	38.6667	43.3333		1348.71	30.6667	50.3333
738	1350.54	38.6667	43.3333		1350.54	30.6667	50.3333
739	1352.37	38.6667	43.3333		1352.37	30.6667	50.3333
740	1354.2	38.6667	43.3333		1354.2	30.6667	57
741	1356.03	38.6667	43.3333		1356.03	30.6667	57
742	1357.86	42	43.3333		1357.86	27.6667	57
743	1359.69	42	43.3333		1359.69	27.6667	53.3333
744	1361.52	42	46.3333		1361.52	27.6667	50.3333
745	1363.35	42	46.3333		1363.35	30.6667	50.3333
746	1365.18	42	46.3333		1365.18	30.6667	46.3333
747	1367.01	42	46.3333		1367.01	33.6667	43.3333
748	1368.84	42	46.3333		1368.84	33.6667	40
749	1370.67	42	46.3333		1370.67	33.6667	43.3333
750	1372.5	52.6667	46.3333		1372.5	30.6667	43.3333
751	1374.33	52.6667	46.3333		1374.33	30.6667	43.3333
752	1376.16	52.6667	46.3333		1376.16	30.6667	43.3333
753	1377.99	49.6667	46.3333		1377.99	33.6667	43.3333
754	1379.82	49.6667	46.3333		1379.82	33.6667	43.3333
755	1381.65	46.6667	46.3333		1381.65	33.6667	43.3333
756	1383.48	46.6667	46.3333		1383.48	36.6667	36.3333
757	1385.31	46.6667	46.3333		1385.31	36.6667	33.3333
758	1387.14	46.6667	46.3333		1387.14	33.6667	33.3333
759	1388.97	46.6667	46.3333		1388.97	33.6667	30
760	1390.8	46.6667	46.3333		1390.8	30.6667	30
761	1392.63	49.6667	46.3333		1392.63	27.6667	33.3333
762	1394.46	49.6667	46.3333		1394.46	27.6667	33.3333
763	1396.29	52.6667	46.3333		1396.29	30.6667	36.3333
764	1398.12	52.6667	46.3333		1398.12	33.6667	36.3333
765	1399.95	52.6667	46.3333		1399.95	33.6667	36.3333
766	1401.78	49.6667	46.3333		1401.78	33.6667	36.3333
767	1403.61	49.6667	46.3333		1403.61	33.6667	36.3333
768	1405.44	49.6667	57		1405.44	33.6667	36.3333
769	1407.27	46.6667	57		1407.27	33.6667	36.3333
770	1409.1	46.6667	60.3333		1409.1	33.6667	36.3333
771	1410.93	43	60.3333		1410.93	33.6667	36.3333
772	1412.76	43	60.3333		1412.76	33.6667	40
773	1414.59	43	60.3333		1414.59	33.6667	40
774	1416.42	40	57		1416.42	33.6667	40
775	1418.25	40	57		1418.25	33.6667	40
776	1420.08	40	50.3333		1420.08	30.6667	40
777	1421.91	43	50.3333		1421.91	27.6667	40
778	1423.74	43	50.3333		1423.74	27.6667	40
779	1425.57	43	50.3333		1425.57	30.6667	40
780	1427.4	46.6667	50.3333		1427.4	30.6667	36.3333
781	1429.23	46.6667	50.3333		1429.23	33.6667	36.3333
782	1431.06	49.6667	50.3333		1431.06	33.6667	36.3333
783	1432.89	49.3333	50.3333		1432.89	33.6667	36.3333
784	1434.72	49.6667	50.3333		1434.72	33.6667	36.3333
785	1436.55	49.3333	50.3333		1436.55	33.6667	36.3333
786	1438.38	49.6667	50.3333		1438.38	33.6667	36.3333
787	1440.21	49.3333	53.3333		1440.21	33.6667	36.3333
788	1442.04	49.6667	53.3333		1442.04	33.6667	36.3333
789	1443.87	49.3333	57		1443.87	33.6667	36.3333
790	1445.7	55.6667	57		1445.7	43	36.3333
791	1447.53	55.6667	57		1447.53	43	40
792	1449.36	55.6667	50.3333		1449.36	40	40
793	1451.19	58.6667	50.3333		1451.19	40	40
794	1453.02	58.6667	50.3333		1453.02	40	43.3333
795	1454.85	61.6667	50.3333		1454.85	40	43.3333
796	1456.68	61.6667	50.3333		1456.68	36.6667	40
797	1458.51	61.6667	50.3333		1458.51	36.6667	43.3333
798	1460.34	61.6667	50.3333		1460.34	36.6667	43.3333
799	1462.17	58.6667	50.3333		1462.17	36.6667	43.3333
800	1464	58.6667	50.3333		1464	33.6667	43.3333
801	1465.83	55.6667	53.3333		1465.83	30.6667	43.3333
802	1467.66	55.6667	53.3333		1467.66	30.6667	43.3333
803	1469.49	58.6667	57		1469.49	33.6667	46.3333
804	1471.32	58.6667	57		1471.32	36.6667	42
805	1473.15	61.6667	60.3333		1473.15	36.6667	42
806	1474.98	61.6667	60.3333		1474.98	30.6667	42
807	1476.81	61.6667	60.3333		1476.81	30.6667	45.3333
808	1478.64	61.6667	60.3333		1478.64	30.6667	45.3333
809	1480.47	61.6667	60.3333		1480.47	33.6667	45.3333
810	1482.3	61.6667	60.3333		1482.3	33.6667	45.3333
811	1484.13	61.6667	60.3333		1484.13	33.6667	49
812	1485.96	61.6667	60.3333		1485.96	36.6667	45.3333
813	1487.79	61.6667	60.3333		1487.79	36.6667	52.3333
814	1489.62	58.6667	60.3333		1489.62	40	52.3333
815	1491.45	58.6667	60.3333		1491.45	40	52.3333
816	1493.28	58.6667	60.3333		1493.28	43	45.3333
817	1495.11	58.6667	60.3333		1495.11	43	42
818	1496.94	58.6667	57		1496.94	40	45.3333
819	1498.77	58.6667	57		1498.77	36.6667	49
820	1500.6	58.6667	53.3333		1500.6	33.6667	50.3333
821	1502.43	58.6667	53.3333		1502.43	33.6667	50.3333
822	1504.26	58.6667	53.3333		1504.26	33.6667	46.3333
823	1506.09	58.6667	53.3333		1506.09	33.6667	46.3333
824	1507.92	58.6667	50.3333		1507.92	40	46.3333
825	1509.75	58.6667	50.3333		1509.75	43	43.3333
826	1511.58	58.6667	50.3333		1511.58	46.6667	43.3333
827	1513.41	58.6667	50.3333		1513.41	49.6667	43.3333
828	1515.24	58.6667	50.3333		1515.24	49.6667	46.3333
829	1517.07	58.6667	50.3333		1517.07	49.6667	46.3333
830	1518.9	55.6667	50.3333		1518.9	33.6667	40
831	1520.73	55.6667	50.3333		1520.73	33.6667	40
832	1522.56	55.6667	57		1522.56	36.6667	36.3333
833	1524.39	58.6667	57		1524.39	40	36.3333
834	1526.22	58.6667	53.3333		1526.22	40	36.3333
835	1528.05	61.6667	53.3333		1528.05	36.6667	40
836	1529.88	61.6667	53.3333		1529.88	33.6667	33.3333
837	1531.71	61.6667	57		1531.71	33.6667	33.3333
838	1533.54	61.6667	60.3333		1533.54	36.6667	33.3333
839	1535.37	61.6667	63.6667		1535.37	36.6667	33.3333
840	1537.2	61.6667	66.6667		1537.2	40	36.3333
841	1539.03	61.6667	66.6667		1539.03	40	36.3333
842	1540.86	61.6667	66.6667		1540.86	40	40
843	1542.69	61.6667	66.6667		1542.69	40	40
844	1544.52	61.6667	66.6667		1544.52	36.6667	40
845	1546.35	61.6667	66.6667		1546.35	36.6667	40
846	1548.18	61.6667	66.6667		1548.18	46.6667	43.3333
847	1550.01	61.6667	66.6667		1550.01	43	46.3333
848	1551.84	61.6667	63.6667		1551.84	43	46.3333
849	1553.67	61.6667	63.6667		1553.67	40	46.3333
850	1555.5	61.6667	63.6667		1555.5	40	43.3333
851	1557.33	61.6667	63.6667		1557.33	43	40
852	1559.16	61.6667	63.6667		1559.16	43	33.3333
853	1560.99	61.6667	63.6667		1560.99	46.6667	33.3333
854	1562.82	58.6667	63.6667		1562.82	46.6667	36.3333
855	1564.65	58.6667	63.6667		1564.65	40	40
856	1566.48	58.6667	56.6667		1566.48	33.6667	43.3333
857	1568.31	58.6667	56.6667		1568.31	33.6667	46.3333
858	1570.14	58.6667	53.3333		1570.14	36.6667	50.3333
859	1571.97	58.6667	50.3333		1571.97	40	50.3333
860	1573.8	58.6667	50.3333		1573.8	36.6667	57
861	1575.63	58.6667	53.3333		1575.63	33.6667	57
862	1577.46	55.6667	56.6667		1577.46	33.6667	57
863	1579.29	55.6667	56.6667		1579.29	33.6667	53.3333
864	1581.12	55.6667	60.3333		1581.12	33.6667	50.3333
865	1582.95	58.6667	60.3333		1582.95	30.6667	46.3333
866	1584.78	58.6667	60.3333		1584.78	30.6667	43.3333
867	1586.61	61.6667	60.3333		1586.61	27.6667	43.3333
868	1588.44	61.6667	60.3333		1588.44	27.6667	30
869	1590.27	61.6667	63.6667		1590.27	27.6667	30
870	1592.1	61.6667	63.6667		1592.1	27.6667	30
871	1593.93	61.6667	63.6667		1593.93	30.6667	33.3333
872	1595.76	61.6667	70.3333		1595.76	33.6667	33.3333
873	1597.59	61.6667	73.6667		1597.59	33.6667	36.3333
874	1599.42	61.6667	73.6667		1599.42	33.6667	36.3333
875	1601.25	61.6667	76.6667		1601.25	33.6667	40
876	1603.08	61.6667	76.6667		1603.08	30.6667	30
877	1604.91	61.6667	73.6667		1604.91	27.6667	33.3333
878	1606.74	68.3333	73.6667		1606.74	27.6667	33.3333
879	1608.57	68.3333	70.3333		1608.57	27.6667	36.3333
880	1610.4	68.3333	63.6667		1610.4	27.6667	36.3333
881	1612.23	68.3333	60.3333		1612.23	30.6667	33.3333
882	1614.06	68.3333	60.3333		1614.06	30.6667	33.3333
883	1615.89	68.3333	56.6667		1615.89	33.6667	30
884	1617.72	68.3333	56.6667		1617.72	33.6667	30
885	1619.55	68.3333	60.3333		1619.55	33.6667	30
886	1621.38	71.3333	60.3333		1621.38	30.6667	30
887	1623.21	74.3333	63.6667		1623.21	30.6667	33.3333
888	1625.04	77.6667	63.6667		1625.04	30.6667	33.3333
889	1626.87	80.6667	63.6667		1626.87	30.6667	36.3333
890	1628.7	80.6667	63.6667		1628.7	30.6667	36.3333
891	1630.53	77.6667	63.6667		1630.53	30.6667	36.3333
892	1632.36	74.3333	63.6667		1632.36	30.6667	40
893	1634.19	71.3333	63.6667		1634.19	30.6667	40
894	1636.02	77.6667	63.6667		1636.02	30.6667	40
895	1637.85	74.3333	63.6667		1637.85	30.6667	40
896	1639.68	71.3333	63.6667		1639.68	30.6667	40
897	1641.51	68.3333	63.6667		1641.51	30.6667	40
898	1643.34	65.3333	63.6667		1643.34	30.6667	40
899	1645.17	61.6667	63.6667		1645.17	30.6667	43.3333
900	1647	61.6667	63.6667		1647	30.6667	43.3333
901	1648.83	58.6667	63.6667		1648.83	30.6667	43.3333
902	1650.66	65.3333	63.6667		1650.66	24.6667	43.3333
903	1652.49	65.3333	63.6667		1652.49	27.6667	40
904	1654.32	65.3333	66.6667		1654.32	27.6667	40
905	1656.15	65.3333	66.6667		1656.15	30.6667	40
906	1657.98	65.3333	66.6667		1657.98	30.6667	36.3333
907	1659.81	65.3333	66.6667		1659.81	27.6667	36.3333
908	1661.64	65.3333	66.6667		1661.64	27.6667	36.3333
909	1663.47	65.3333	66.6667		1663.47	24.6667	36.3333
910	1665.3	63.3333	66.6667		1665.3	40	36.3333
911	1667.13	59.6667	66.6667		1667.13	40	36.3333
912	1668.96	59.6667	63.6667		1668.96	36.6667	33.3333
913	1670.79	59.6667	63.6667		1670.79	33.6667	33.3333
914	1672.62	59.6667	63.6667		1672.62	30.6667	33.3333
915	1674.45	63.3333	63.6667		1674.45	27.6667	33.3333
916	1676.28	66.3333	63.6667		1676.28	24.6667	43.3333
917	1678.11	69.3333	63.6667		1678.11	21.6667	43.3333
918	1679.94	63.3333	63.6667		1679.94	27.6667	43.3333
919	1681.77	63.3333	63.6667		1681.77	27.6667	43.3333
920	1683.6	66.3333	63.6667		1683.6	27.6667	43.3333
921	1685.43	69.3333	63.6667		1685.43	27.6667	43.3333
922	1687.26	69.3333	63.6667		1687.26	30.6667	43.3333
923	1689.09	69.3333	63.6667		1689.09	33.6667	43.3333
924	1690.92	66.3333	63.6667		1690.92	36.6667	50.3333
925	1692.75	66.3333	63.6667		1692.75	36.6667	50.3333
926	1694.58	72.3333	63.6667		1694.58	33.6667	53.3333
927	1696.41	72.3333	63.6667		1696.41	33.6667	53.3333
928	1698.24	72.3333	63.6667		1698.24	30.6667	50.3333
929	1700.07	72.3333	63.6667		1700.07	27.6667	46.3333
930	1701.9	72.3333	63.6667		1701.9	27.6667	43.3333
931	1703.73	72.3333	63.6667		1703.73	30.6667	43.3333
932	1705.56	72.3333	63.6667		1705.56	33.6667	36.3333
933	1707.39	72.3333	63.6667		1707.39	33.6667	36.3333
934	1709.22	69.3333	63.6667		1709.22	40	36.3333
935	1711.05	69.3333	63.6667		1711.05	40	36.3333
936	1712.88	69.3333	63.6667		1712.88	40	36.3333
937	1714.71	66.3333	63.6667		1714.71	40	36.3333
938	1716.54	66.3333	63.6667		1716.54	40	36.3333
939	1718.37	63.3333	63.6667		1718.37	36.6667	36.3333
940	1720.2	63.3333	63.6667		1720.2	33.6667	36.3333
941	1722.03	63.3333	63.6667		1722.03	30.6667	33.3333
942	1723.86	75.3333	63.6667		1723.86	30.6667	33.3333
943	1725.69	78.3333	63.6667		1725.69	30.6667	33.3333
944	1727.52	81.6667	63.6667		1727.52	30.6667	33.3333
945	1729.35	84.6667	63.6667		1729.35	30.6667	36.3333
946	1731.18	84.6667	63.6667		1731.18	30.6667	40
947	1733.01	84.6667	63.6667		1733.01	30.6667	43.3333
948	1734.84	84.6667	63.6667		1734.84	30.6667	36.3333
949	1736.67	84.6667	63.6667		1736.67	30.6667	33.3333
950	1738.5	78.3333	63.6667		1738.5	30.6667	33.3333
951	1740.33	78.3333	63.6667		1740.33	30.6667	33.3333
952	1742.16	78.3333	64.3333		1742.16	30.6667	33.3333
953	1743.99	78.3333	64.3333		1743.99	30.6667	30
954	1745.82	78.3333	64.3333		1745.82	30.6667	30
955	1747.65	78.3333	64.3333		1747.65	30.6667	30
956	1749.48	78.3333	64.3333		1749.48	30.6667	26.3333
957	1751.31	78.3333	64.3333		1751.31	30.6667	26.3333
958	1753.14	66.3333	64.3333		1753.14	30.6667	30
959	1754.97	66.3333	64.3333		1754.97	30.6667	33.3333
960	1756.8	66.3333	64.3333		1756.8	30.6667	33.3333
961	1758.63	66.3333	64.3333		1758.63	30.6667	36.3333
962	1760.46	66.3333	64.3333		1760.46	30.6667	40
963	1762.29	66.3333	64.3333		1762.29	30.6667	40
964	1764.12	66.3333	64.3333		1764.12	30.6667	43.3333
965	1765.95	66.3333	64.3333		1765.95	30.6667	43.3333
966	1767.78	69.3333	64.3333		1767.78	40	43.3333
967	1769.61	69.3333	64.3333		1769.61	37	40
968	1771.44	66.3333	63.6667		1771.44	33.6667	40
969	1773.27	63.3333	63.6667		1773.27	30.6667	43.3333
970	1775.1	59.6667	63.6667		1775.1	27.6667	43.3333
971	1776.93	59.6667	63.6667		1776.93	27.6667	43.3333
972	1778.76	56.6667	63.6667		1778.76	27.6667	43.3333
973	1780.59	56.6667	63.6667		1780.59	27.6667	40
974	1782.42	59.6667	63.6667		1782.42	33.6667	36.3333
975	1784.25	63.3333	63.6667		1784.25	33.6667	36.3333
976	1786.08	66.3333	66.6667		1786.08	30.6667	36.3333
977	1787.91	69.3333	63.6667		1787.91	27.6667	40
978	1789.74	72.3333	63.6667		1789.74	27.6667	43.3333
979	1791.57	72.3333	60.3333		1791.57	30.6667	43.3333
980	1793.4	72.3333	60.3333		1793.4	30.6667	43.3333
981	1795.23	72.3333	63.6667		1795.23	33.6667	40
982	1797.06	56.6667	63.6667		1797.06	33.6667	36.3333
983	1798.89	59.6667	66.6667		1798.89	33.6667	33.3333
984	1800.72	59.6667	60.3333		1800.72	33.6667	33.3333
985	1802.55	63.3333	60.3333		1802.55	36.6667	33.3333
986	1804.38	63.3333	63.6667		1804.38	36.6667	33.3333
987	1806.21	66.3333	63.6667		1806.21	33.6667	33.3333
988	1808.04	66.3333	66.6667		1808.04	33.6667	40
989	1809.87	66.3333	70.3333		1809.87	33.6667	40
990	1811.7	78.3333	70.3333		1811.7	30.6667	43.3333
991	1813.53	78.3333	73.6667		1813.53	30.6667	43.3333
992	1815.36	78.3333	80.3333		1815.36	30.6667	43.3333
993	1817.19	75.3333	80.3333		1817.19	30.6667	46.3333
994	1819.02	75.3333	80.3333		1819.02	30.6667	46.3333
995	1820.85	72.3333	80.3333		1820.85	30.6667	46.3333
996	1822.68	72.3333	80.3333		1822.68	30.6667	30
997	1824.51	72.3333	80.3333		1824.51	30.6667	30
998	1826.34	66.3333	80.3333		1826.34	43	33.3333
999	1828.17	69.3333	80.3333		1828.17	40	33.3333
1000	1830	69.3333	73.6667		1830	36.6667	36.3333
1001	1831.83	72.3333	73.6667		1831.83	36.6667	36.3333
1002	1833.66	72.3333	73.6667		1833.66	33.6667	36.3333
1003	1835.49	69.3333	73.6667		1835.49	33.6667	36.3333
1004	1837.32	69.3333	73.6667		1837.32	36.6667	36.3333
1005	1839.15	66.3333	73.6667		1839.15	36.6667	36.3333
1006	1840.98	59.6667	73.6667		1840.98	33.6667	36.3333
1007	1842.81	63.3333	73.6667		1842.81	33.6667	36.3333
1008	1844.64	63.3333	66.6667		1844.64	33.6667	36.3333
1009	1846.47	66.3333	66.6667		1846.47	33.6667	36.3333
1010	1848.3	69.3333	66.6667		1848.3	33.6667	36.3333
1011	1850.13	72.3333	66.6667		1850.13	33.6667	36.3333
1012	1851.96	75.3333	70.3333		1851.96	33.6667	33.3333
1013	1853.79	75.3333	70.3333		1853.79	33.6667	33.3333
1014	1855.62	75.3333	70.3333		1855.62	33.6667	33.3333
1015	1857.45	78.3333	70.3333		1857.45	33.6667	30
1016	1859.28	78.3333	64.3333		1859.28	33.6667	30
1017	1861.11	81.6667	64.3333		1861.11	33.6667	30
1018	1862.94	81.6667	68.3333		1862.94	33.6667	33.3333
1019	1864.77	78.3333	71.3333		1864.77	33.6667	33.3333
1020	1866.6	78.3333	71.3333		1866.6	33.6667	33.3333
1021	1868.43	75.3333	71.3333		1868.43	33.6667	33.3333
1022	1870.26	79.3333	68.3333		1870.26	40	33.3333
1023	1872.09	79.3333	68.3333		1872.09	36.6667	33.3333
1024	1873.92	76.3333	68.3333		1873.92	36.6667	33.3333
1025	1875.75	76.3333	71.3333		1875.75	33.6667	33.3333
1026	1877.58	76.3333	71.3333		1877.58	33.6667	33.3333
1027	1879.41	79.3333	74.3333		1879.41	36.6667	33.3333
1028	1881.24	79.3333	78.3333		1881.24	36.6667	33.3333
1029	1883.07	82.3333	81.3333		1883.07	40	33.3333
1030	1884.9	95.3333	85		1884.9	43	33.3333
1031	1886.73	92.3333	85		1886.73	43	33.3333
1032	1888.56	89.3333	88.3333		1888.56	43	33.3333
1033	1890.39	86.3333	88.3333		1890.39	43	33.3333
1034	1892.22	86.3333	88.3333		1892.22	43	33.3333
1035	1894.05	86.3333	88.3333		1894.05	40	33.3333
1036	1895.88	86.3333	85		1895.88	36.6667	30
1037	1897.71	89.3333	85		1897.71	33.6667	30
1038	1899.54	95.3333	85		1899.54	27.6667	30
1039	1901.37	95.3333	81.3333		1901.37	27.6667	30
1040	1903.2	95.3333	74.3333		1903.2	24.6667	30
1041	1905.03	95.3333	74.3333		1905.03	27.6667	30
1042	1906.86	92.3333	71.3333		1906.86	30.6667	30
1043	1908.69	89.3333	68.3333		1908.69	33.6667	30
1044	1910.52	86.3333	68.3333		1910.52	36.6667	36.3333
1045	1912.35	86.3333	64.3333		1912.35	40	36.3333
1046	1914.18	76.3333	61.3333		1914.18	49.6667	36.3333
1047	1916.01	76.3333	61.3333		1916.01	43	36.3333
1048	1917.84	76.3333	74.3333		1917.84	40	36.3333
1049	1919.67	76.3333	74.3333		1919.67	33.6667	36.3333
1050	1921.5	76.3333	74.3333		1921.5	27.6667	36.3333
1051	1923.33	82.3333	74.3333		1923.33	27.6667	36.3333
1052	1925.16	86.3333	74.3333		1925.16	24.6667	36.3333
1053	1926.99	89.3333	74.3333		1926.99	24.6667	36.3333
1054	1928.82	81.6667	74.3333		1928.82	30.6667	36.3333
1055	1930.65	83.6667	74.3333		1930.65	30.6667	40
1056	1932.48	83.6667	71.3333		1932.48	30.6667	40
1057	1934.31	80.6667	71.3333		1934.31	30.6667	43.3333
1058	1936.14	80.6667	71.3333		1936.14	30.6667	43.3333
1059	1937.97	77.6667	71.3333		1937.97	30.6667	43.3333
1060	1939.8	77.6667	71.3333		1939.8	30.6667	36.3333
1061	1941.63	77.6667	71.3333		1941.63	30.6667	40
1062	1943.46	71.3333	71.3333		1943.46	30.6667	40
1063	1945.29	71.3333	71.3333		1945.29	30.6667	43.3333
1064	1947.12	71.3333	76.6667		1947.12	30.6667	43.3333
1065	1948.95	68.3333	76.6667		1948.95	30.6667	46.3333
1066	1950.78	65.3333	76.6667		1950.78	30.6667	46.3333
1067	1952.61	65.3333	73.6667		1952.61	30.6667	46.3333
1068	1954.44	65.3333	73.6667		1954.44	30.6667	46.3333
1069	1956.27	59.6667	73.6667		1956.27	30.6667	46.3333
1070	1958.1	63.3333	70.3333		1958.1	36.6667	46.3333
1071	1959.93	63.3333	70.3333		1959.93	43	46.3333
1072	1961.76	66.3333	63.6667		1961.76	46.6667	46.3333
1073	1963.59	69.3333	66.6667		1963.59	43	46.3333
1074	1965.42	69.3333	70.3333		1965.42	36.6667	46.3333
1075	1967.25	66.3333	70.3333		1967.25	36.6667	46.3333
1076	1969.08	63.3333	70.3333		1969.08	40	50.3333
1077	1970.91	63.3333	70.3333		1970.91	43	50.3333
1078	1972.74	66.3333	66.6667		1972.74	36.6667	50.3333
1079	1974.57	66.3333	63.6667		1974.57	36.6667	50.3333
1080	1976.4	66.3333	64.3333		1976.4	36.6667	50.3333
1081	1978.23	66.3333	64.3333		1978.23	33.6667	46.3333
1082	1980.06	69.3333	64.3333		1980.06	33.6667	43.3333
1083	1981.89	72.3333	64.3333		1981.89	33.6667	40
1084	1983.72	75.3333	64.3333		1983.72	30.6667	40
1085	1985.55	75.3333	64.3333		1985.55	30.6667	40
1086	1987.38	75.3333	64.3333		1987.38	27.6667	36.3333
1087	1989.21	78.3333	64.3333		1989.21	30.6667	36.3333
1088	1991.04	78.3333	64.3333		1991.04	33.6667	36.3333
1089	1992.87	81.3333	61.3333		1992.87	36.6667	40
1090	1994.7	81.3333	61.3333		1994.7	36.6667	40
1091	1996.53	78.3333	61.3333		1996.53	36.6667	43.3333
1092	1998.36	78.3333	61.3333		1998.36	36.6667	33.3333
1093	2000.19	75.3333	64.3333		2000.19	33.6667	36.3333
1094	2002.02	88.3333	68.3333		2002.02	33.6667	36.3333
1095	2003.85	85	71.3333		2003.85	33.6667	40
1096	2005.68	78.3333	81.3333		2005.68	33.6667	40
1097	2007.51	75.3333	81.3333		2007.51	33.6667	43.3333
1098	2009.34	75.3333	81.3333		2009.34	33.6667	43.3333
1099	2011.17	78.3333	81.3333		2011.17	33.6667	46.3333
1100	2013	85	81.3333		2013	33.6667	50.3333
1101	2014.83	91.3333	81.3333		2014.83	33.6667	50.3333
1102	2016.66	88.3333	81.3333		2016.66	33.6667	50.3333
1103	2018.49	85	81.3333		2018.49	33.6667	46.3333
1104	2020.32	81.3333	81.3333		2020.32	33.6667	46.3333
1105	2022.15	78.3333	81.3333		2022.15	33.6667	43.3333
1106	2023.98	72.3333	85		2023.98	33.6667	43.3333
1107	2025.81	66.3333	85		2025.81	33.6667	43.3333
1108	2027.64	63.3333	85		2027.64	33.6667	43.3333
1109	2029.47	63.3333	88.3333		2029.47	33.6667	43.3333
1110	2031.3	63.3333	88.3333		2031.3	40	43.3333
1111	2033.13	63.3333	88.3333		2033.13	40	43.3333
1112	2034.96	60	91.6667		2034.96	36.6667	43.3333
1113	2036.79	60	91.6667		2036.79	36.6667	43.3333
1114	2038.62	60	91.6667		2038.62	33.6667	43.3333
1115	2040.45	60	91.6667		2040.45	30.6667	43.3333
1116	2042.28	63.3333	91.6667		2042.28	30.6667	43.3333
1117	2044.11	63.3333	91.6667		2044.11	30.6667	40
1118	2045.94	61.3333	91.6667		2045.94	33.6667	36.3333
1119	2047.77	64.3333	91.6667		2047.77	33.6667	30
1120	2049.6	70.3333	95		2049.6	30.6667	30
1121	2051.43	76.3333	95		2051.43	30.6667	26.3333
1122	2053.26	82.3333	91.6667		2053.26	33.6667	26.3333
1123	2055.09	86.3333	91.6667		2055.09	36.6667	26.3333
1124	2056.92	86.3333	91.6667		2056.92	40	36.3333
1125	2058.75	86.3333	95		2058.75	40	36.3333
1126	2060.58	89.3333	98.3333		2060.58	36.6667	36.3333
1127	2062.41	89.3333	98.3333		2062.41	36.6667	36.3333
1128	2064.24	92.3333	98.3333		2064.24	36.6667	36.3333
1129	2066.07	95.3333	95.3333		2066.07	36.6667	36.3333
1130	2067.9	98.3333	88.3333		2067.9	36.6667	36.3333
1131	2069.73	101.333	85		2069.73	36.6667	36.3333
1132	2071.56	101.333	81.3333		2071.56	36.6667	30
1133	2073.39	104.333	78.3333		2073.39	36.6667	30
1134	2075.22	84.6667	78.3333		2075.22	43	33.3333
1135	2077.05	81.6667	78.3333		2077.05	40	33.3333
1136	2078.88	78.3333	85		2078.88	36.6667	36.3333
1137	2080.71	75.3333	81.3333		2080.71	33.6667	40
1138	2082.54	72.3333	78.3333		2082.54	33.6667	40
1139	2084.37	69.3333	74.3333		2084.37	33.6667	43.3333
1140	2086.2	69.3333	71.3333		2086.2	33.6667	40
1141	2088.03	69.3333	71.3333		2088.03	33.6667	43.3333
1142	2089.86	69.3333	71.3333		2089.86	40	43.3333
1143	2091.69	72.3333	71.3333		2091.69	40	46.3333
1144	2093.52	72.3333	64.3333		2093.52	36.6667	46.3333
1145	2095.35	75.3333	64.3333		2095.35	36.6667	46.3333
1146	2097.18	75.3333	64.3333		2097.18	36.6667	43.3333
1147	2099.01	72.3333	64.3333		2099.01	36.6667	43.3333
1148	2100.84	72.3333	64.3333		2100.84	33.6667	43.3333
1149	2102.67	69.3333	64.3333		2102.67	33.6667	43.3333
1150	2104.5	72.3333	64.3333		2104.5	36.6667	40
1151	2106.33	72.3333	64.3333		2106.33	36.6667	40
1152	2108.16	75.3333	64.3333		2108.16	36.6667	43.3333
1153	2109.99	75.3333	64.3333		2109.99	36.6667	46.3333
1154	2111.82	75.3333	64.3333		2111.82	33.6667	50.3333
1155	2113.65	78.3333	68.3333		2113.65	30.6667	50.3333
1156	2115.48	78.3333	68.3333		2115.48	27.6667	43.3333
1157	2117.31	78.3333	71.3333		2117.31	24.6667	43.3333
1158	2119.14	75.3333	71.3333		2119.14	30.6667	40
1159	2120.97	75.3333	71.3333		2120.97	27.6667	40
1160	2122.8	75.3333	68.3333		2122.8	27.6667	36.3333
1161	2124.63	75.3333	68.3333		2124.63	24.6667	36.3333
1162	2126.46	75.3333	64.3333		2126.46	24.6667	36.3333
1163	2128.29	72.3333	64.3333		2128.29	27.6667	36.3333
1164	2130.12	66.3333	61.3333		2130.12	27.6667	36.3333
1165	2131.95	66.3333	64.3333		2131.95	30.6667	36.3333
1166	2133.78	59.6667	64.3333		2133.78	30.6667	36.3333
1167	2135.61	59.6667	68.3333		2135.61	30.6667	36.3333
1168	2137.44	59.6667	61.3333		2137.44	33.6667	36.3333
1169	2139.27	59.6667	64.3333		2139.27	36.6667	36.3333
1170	2141.1	59.6667	64.3333		2141.1	40	36.3333
1171	2142.93	56.6667	64.3333		2142.93	43	36.3333
1172	2144.76	56.6667	68.3333		2144.76	43	46.3333
1173	2146.59	56.6667	68.3333		2146.59	46.6667	46.3333
1174	2148.42	53.3333	68.3333		2148.42	33.6667	40
1175	2150.25	53.3333	68.3333		2150.25	33.6667	36.3333
1176	2152.08	56.6667	76.6667		2152.08	36.6667	33.3333
1177	2153.91	63.3333	76.6667		2153.91	36.6667	30
1178	2155.74	69.3333	76.6667		2155.74	40	30
1179	2157.57	72.3333	76.6667		2157.57	40	30
1180	2159.4	75.3333	76.6667		2159.4	40	36.3333
1181	2161.23	78.3333	76.6667		2161.23	40	36.3333
1182	2163.06	69.3333	76.6667		2163.06	40	36.3333
1183	2164.89	66.3333	76.6667		2164.89	36.6667	36.3333
1184	2166.72	59.6667	76.6667		2166.72	33.6667	36.3333
1185	2168.55	56.6667	73.6667		2168.55	30.6667	36.3333
1186	2170.38	56.6667	70.3333		2170.38	30.6667	36.3333
1187	2172.21	59.6667	70.3333		2172.21	30.6667	36.3333
1188	2174.04	63.3333	66.6667		2174.04	30.6667	46.3333
1189	2175.87	66.3333	66.6667		2175.87	33.6667	46.3333
1190	2177.7	66.3333	70.3333		2177.7	30.6667	46.3333
1191	2179.53	66.3333	70.3333		2179.53	30.6667	46.3333
1192	2181.36	66.3333	64.3333		2181.36	30.6667	46.3333
1193	2183.19	66.3333	64.3333		2183.19	30.6667	46.3333
1194	2185.02	66.3333	68.3333		2185.02	30.6667	46.3333
1195	2186.85	66.3333	71.3333		2186.85	30.6667	46.3333
1196	2188.68	66.3333	71.3333		2188.68	30.6667	40
1197	2190.51	66.3333	74.3333		2190.51	30.6667	40
1198	2192.34	74.3333	78.3333		2192.34	30.6667	36.3333
1199	2194.17	74.3333	78.3333		2194.17	30.6667	33.3333
1200	2196	74.3333	81.3333		2196	30.6667	33.3333
1201	2197.83	74.3333	81.3333		2197.83	33.6667	36.3333
1202	2199.66	74.3333	81.3333		2199.66	33.6667	36.3333
1203	2201.49	74.3333	81.3333		2201.49	36.6667	40
1204	2203.32	74.3333	81.3333		2203.32	36.6667	33.3333
1205	2205.15	74.3333	81.3333		2205.15	36.6667	36.3333
1206	2206.98	71.3333	81.3333		2206.98	40	36.3333
1207	2208.81	71.3333	81.3333		2208.81	43	36.3333
1208	2210.64	71.3333	85		2210.64	49.6667	36.3333
1209	2212.47	71.3333	81.3333		2212.47	55.6667	36.3333
1210	2214.3	71.3333	81.3333		2214.3	58.6667	36.3333
1211	2216.13	71.3333	81.3333		2216.13	61.6667	36.3333
1212	2217.96	71.3333	78.3333		2217.96	61.6667	36.3333
1213	2219.79	71.3333	78.3333		2219.79	61.6667	36.3333
1214	2221.62	74.3333	78.3333		2221.62	49.6667	40
1215	2223.45	71.3333	74.3333		2223.45	49.6667	43.3333
1216	2225.28	68.3333	64.3333		2225.28	46.6667	46.3333
1217	2227.11	65.3333	64.3333		2227.11	43	50.3333
1218	2228.94	65.3333	64.3333		2228.94	43	50.3333
1219	2230.77	65.3333	64.3333		2230.77	46.6667	53.3333
1220	2232.6	68.3333	61.3333		2232.6	46.6667	46.3333
1221	2234.43	68.3333	61.3333		2234.43	49.6667	43.3333
1222	2236.26	80.6667	61.3333		2236.26	46.6667	40
1223	2238.09	80.6667	61.3333		2238.09	46.6667	40
1224	2239.92	77.6667	66.6667		2239.92	43	36.3333
1225	2241.75	77.6667	66.6667		2241.75	43	36.3333
1226	2243.58	77.6667	70.3333		2243.58	43	40
1227	2245.41	77.6667	70.3333		2245.41	40	40
1228	2247.24	77.6667	70.3333		2247.24	40	43.3333
1229	2249.07	77.6667	70.3333		2249.07	40	43.3333
1230	2250.9	75.3333	66.6667		2250.9	38.6667	43.3333
1231	2252.73	75.3333	66.6667		2252.73	42	43.3333
1232	2254.56	75.3333	66.6667		2254.56	45.6667	43.3333
1233	2256.39	78.3333	66.6667		2256.39	45.6667	43.3333
1234	2258.22	78.3333	66.6667		2258.22	45.6667	43.3333
1235	2260.05	81.6667	66.6667		2260.05	45.6667	40
1236	2261.88	81.6667	66.6667		2261.88	42	36.3333
1237	2263.71	81.6667	66.6667		2263.71	38.6667	40
1238	2265.54	72.3333	66.6667		2265.54	35.6667	40
1239	2267.37	69.3333	66.6667		2267.37	35.6667	40
1240	2269.2	63.3333	66.6667		2269.2	32.6667	40
1241	2271.03	56.6667	66.6667		2271.03	29.6667	40
1242	2272.86	59.6667	66.6667		2272.86	29.6667	40
1243	2274.69	63.3333	66.6667		2274.69	32.6667	40
1244	2276.52	69.3333	66.6667		2276.52	35.6667	40
1245	2278.35	77.6667	66.6667		2278.35	35.6667	40
1246	2280.18	65.3333	66.6667		2280.18	30.6667	43.3333
1247	2282.01	65.3333	66.6667		2282.01	30.6667	46.3333
1248	2283.84	61.6667	63.6667		2283.84	30.6667	50.3333
1249	2285.67	61.6667	63.6667		2285.67	30.6667	57
1250	2287.5	61.6667	63.6667		2287.5	30.6667	57
1251	2289.33	58.6667	63.6667		2289.33	30.6667	60.3333
1252	2291.16	58.6667	63.6667		2291.16	30.6667	57
1253	2292.99	58.6667	63.6667		2292.99	30.6667	57
1254	2294.82	61.6667	63.6667		2294.82	33.6667	60.3333
1255	2296.65	61.6667	63.6667		2296.65	36.6667	60.3333
1256	2298.48	68.3333	60.3333		2298.48	36.6667	60.3333
1257	2300.31	71.3333	60.3333		2300.31	36.6667	60.3333
1258	2302.14	71.3333	60.3333		2302.14	36.6667	57
1259	2303.97	68.3333	60.3333		2303.97	33.6667	57
1260	2305.8	61.6667	60.3333		2305.8	30.6667	50.3333
1261	2307.63	58.6667	60.3333		2307.63	27.6667	50.3333
1262	2309.46	53.3333	60.3333		2309.46	30.6667	50.3333
1263	2311.29	56.6667	60.3333		2311.29	30.6667	46.3333
1264	2313.12	56.6667	63.6667		2313.12	33.6667	46.3333
1265	2314.95	59.6667	63.6667		2314.95	33.6667	43.3333
1266	2316.78	59.6667	63.6667		2316.78	36.6667	43.3333
1267	2318.61	63.3333	63.6667		2318.61	36.6667	43.3333
1268	2320.44	63.3333	63.6667		2320.44	36.6667	30
1269	2322.27	66.3333	63.6667		2322.27	36.6667	30
1270	2324.1	72.3333	63.6667		2324.1	33.6667	26.3333
1271	2325.93	69.3333	63.6667		2325.93	33.6667	26.3333
1272	2327.76	66.3333	63.6667		2327.76	33.6667	26.3333
1273	2329.59	59.6667	66.6667		2329.59	33.6667	26.3333
1274	2331.42	59.6667	70.3333		2331.42	33.6667	30
1275	2333.25	63.3333	70.3333		2333.25	33.6667	30
1276	2335.08	66.3333	70.3333		2335.08	33.6667	40
1277	2336.91	69.3333	70.3333		2336.91	33.6667	40
1278	2338.74	74.3333	66.6667		2338.74	36.6667	40
1279	2340.57	74.3333	63.6667		2340.57	36.6667	40
1280	2342.4	71.3333	63.6667		2342.4	36.6667	40
1281	2344.23	68.3333	63.6667		2344.23	36.6667	40
1282	2346.06	68.3333	66.6667		2346.06	36.6667	40
1283	2347.89	65.3333	70.3333		2347.89	36.6667	40
1284	2349.72	61.6667	73.6667		2349.72	36.6667	40
1285	2351.55	61.6667	80.3333		2351.55	36.6667	40
1286	2353.38	61.6667	87.3333		2353.38	40	40
1287	2355.21	61.6667	90.6667		2355.21	36.6667	40
1288	2357.04	61.6667	91.3333		2357.04	36.6667	40
1289	2358.87	61.6667	91.3333		2358.87	33.6667	40
1290	2360.7	61.6667	88.3333		2360.7	33.6667	40
1291	2362.53	61.6667	88.3333		2362.53	36.6667	40
1292	2364.36	61.6667	85		2364.36	36.6667	40
1293	2366.19	61.6667	81.3333		2366.19	40	40
1294	2368.02	58.6667	81.3333		2368.02	36.6667	40
1295	2369.85	58.6667	81.3333		2369.85	36.6667	40
1296	2371.68	58.6667	85		2371.68	36.6667	40
1297	2373.51	58.6667	85		2373.51	36.6667	40
1298	2375.34	58.6667	81.3333		2375.34	36.6667	40
1299	2377.17	58.6667	81.3333		2377.17	36.6667	40
1300	2379	58.6667	74.3333		2379	36.6667	43.3333
1301	2380.83	58.6667	71.3333		2380.83	36.6667	40
1302	2382.66	68.3333	64.3333		2382.66	33.6667	40
1303	2384.49	71.3333	61.3333		2384.49	33.6667	36.3333
1304	2386.32	71.3333	63.6667		2386.32	33.6667	36.3333
1305	2388.15	74.3333	63.6667		2388.15	33.6667	40
1306	2389.98	74.3333	63.6667		2389.98	33.6667	43.3333
1307	2391.81	71.3333	63.6667		2391.81	33.6667	43.3333
1308	2393.64	71.3333	63.6667		2393.64	33.6667	33.3333
1309	2395.47	68.3333	63.6667		2395.47	33.6667	33.3333
1310	2397.3	66.3333	63.6667		2397.3	40	33.3333
1311	2399.13	66.3333	63.6667		2399.13	43	36.3333
1312	2400.96	66.3333	56.6667		2400.96	43	36.3333
1313	2402.79	69.3333	56.6667		2402.79	46.6667	40
1314	2404.62	69.3333	56.6667		2404.62	46.6667	40
1315	2406.45	72.3333	53.3333		2406.45	43	43.3333
1316	2408.28	72.3333	53.3333		2408.28	43	36.3333
1317	2410.11	72.3333	53.3333		2410.11	40	36.3333
1318	2411.94	78.3333	56.6667		2411.94	43	36.3333
1319	2413.77	78.3333	56.6667		2413.77	46.6667	36.3333
1320	2415.6	81.6667	60.3333		2415.6	49.6667	36.3333
1321	2417.43	78.3333	60.3333		2417.43	49.6667	36.3333
1322	2419.26	75.3333	60.3333		2419.26	49.6667	36.3333
1323	2421.09	72.3333	60.3333		2421.09	49.6667	36.3333
1324	2422.92	69.3333	60.3333		2422.92	46.6667	36.3333
1325	2424.75	66.3333	60.3333		2424.75	43	40
1326	2426.58	65.3333	60.3333		2426.58	43	43.3333
1327	2428.41	65.3333	60.3333		2428.41	43	43.3333
1328	2430.24	65.3333	60.3333		2430.24	43	43.3333
1329	2432.07	65.3333	60.3333		2432.07	40	43.3333
1330	2433.9	65.3333	60.3333		2433.9	40	40
1331	2435.73	65.3333	60.3333		2435.73	40	36.3333
1332	2437.56	65.3333	60.3333		2437.56	36.6667	43.3333
1333	2439.39	65.3333	60.3333		2439.39	36.6667	40
1334	2441.22	68.3333	60.3333		2441.22	36.6667	36.3333
1335	2443.05	65.3333	60.3333		2443.05	36.6667	36.3333
1336	2444.88	65.3333	60.3333		2444.88	36.6667	36.3333
1337	2446.71	61.6667	56.6667		2446.71	36.6667	36.3333
1338	2448.54	61.6667	56.6667		2448.54	36.6667	40
1339	2450.37	65.3333	53.3333		2450.37	36.6667	43.3333
1340	2452.2	65.3333	53.3333		2452.2	36.6667	40
1341	2454.03	68.3333	56.6667		2454.03	36.6667	40
1342	2455.86	69.3333	56.6667		2455.86	36.6667	40
1343	2457.69	72.3333	60.3333		2457.69	36.6667	40
1344	2459.52	72.3333	63.6667		2459.52	36.6667	40
1345	2461.35	72.3333	63.6667		2461.35	40	40
1346	2463.18	72.3333	63.6667		2463.18	40	40
1347	2465.01	69.3333	63.6667		2465.01	43	40
1348	2466.84	66.3333	63.6667		2466.84	43	36.3333
1349	2468.67	63.3333	63.6667		2468.67	46.6667	36.3333
1350	2470.5	63.3333	63.6667		2470.5	40	36.3333
1351	2472.33	63.3333	63.6667		2472.33	40	40
1352	2474.16	63.3333	63.6667		2474.16	40	40
1353	2475.99	63.3333	63.6667		2475.99	40	40
1354	2477.82	63.3333	63.6667		2477.82	40	40
1355	2479.65	63.3333	63.6667		2479.65	40	43.3333
1356	2481.48	63.3333	63.6667		2481.48	40	43.3333
1357	2483.31	63.3333	63.6667		2483.31	40	43.3333
1358	2485.14	66.3333	63.6667		2485.14	40	43.3333
1359	2486.97	66.3333	63.6667		2486.97	40	43.3333
1360	2488.8	66.3333	66.6667		2488.8	40	43.3333
1361	2490.63	66.3333	66.6667		2490.63	36.6667	43.3333
1362	2492.46	66.3333	66.6667		2492.46	36.6667	43.3333
1363	2494.29	66.3333	66.6667		2494.29	33.6667	43.3333
1364	2496.12	66.3333	66.6667		2496.12	33.6667	43.3333
1365	2497.95	66.3333	66.6667		2497.95	33.6667	43.3333
1366	2499.78	75.3333	66.6667		2499.78	40	43.3333
1367	2501.61	75.3333	66.6667		2501.61	40	43.3333
1368	2503.44	75.3333	63.6667		2503.44	43	43.3333
1369	2505.27	75.3333	63.6667		2505.27	43	43.3333
1370	2507.1	72.3333	63.6667		2507.1	43	43.3333
1371	2508.93	69.3333	63.6667		2508.93	46.6667	43.3333
1372	2510.76	66.3333	63.6667		2510.76	46.6667	43.3333
1373	2512.59	66.3333	63.6667		2512.59	46.6667	40
1374	2514.42	72.3333	63.6667		2514.42	45.6667	40
1375	2516.25	72.3333	63.6667		2516.25	45.6667	36.3333
1376	2518.08	72.3333	63.6667		2518.08	45.6667	36.3333
1377	2519.91	69.3333	63.6667		2519.91	42	40
1378	2521.74	69.3333	63.6667		2521.74	42	40
1379	2523.57	66.3333	63.6667		2523.57	42	43.3333
1380	2525.4	66.3333	63.6667		2525.4	38.6667	46.3333
1381	2527.23	66.3333	63.6667		2527.23	38.6667	46.3333
1382	2529.06	72.3333	63.6667		2529.06	38.6667	46.3333
1383	2530.89	72.3333	63.6667		2530.89	38.6667	43.3333
1384	2532.72	72.3333	63.6667		2532.72	38.6667	43.3333
1385	2534.55	69.3333	63.6667		2534.55	42	40
1386	2536.38	69.3333	63.6667		2536.38	42	40
1387	2538.21	66.3333	63.6667		2538.21	45.6667	40
1388	2540.04	66.3333	63.6667		2540.04	45.6667	40
1389	2541.87	66.3333	63.6667		2541.87	45.6667	40
1390	2543.7	66.3333	63.6667		2543.7	51.6667	40
1391	2545.53	69.3333	63.6667		2545.53	51.6667	40
1392	2547.36	75.3333	60.3333		2547.36	51.6667	40
1393	2549.19	78.3333	60.3333		2549.19	48.6667	40
1394	2551.02	78.3333	60.3333		2551.02	48.6667	40
1395	2552.85	75.3333	60.3333		2552.85	48.6667	40
1396	2554.68	69.3333	60.3333		2554.68	48.6667	40
1397	2556.51	66.3333	60.3333		2556.51	45.6667	43.3333
1398	2558.34	69.3333	60.3333		2558.34	45.6667	43.3333
1399	2560.17	69.3333	60.3333		2560.17	45.6667	46.3333
1400	2562	69.3333	60.3333		2562	45.6667	46.3333
1401	2563.83	69.3333	60.3333		2563.83	45.6667	43.3333
1402	2565.66	69.3333	60.3333		2565.66	42	43.3333
1403	2567.49	69.3333	60.3333		2567.49	42	40
1404	2569.32	69.3333	60.3333		2569.32	42	40
1405	2571.15	69.3333	60.3333		2571.15	38.6667	40
1406	2572.98	63.3333	60.3333		2572.98	40	40
1407	2574.81	63.3333	60.3333		2574.81	40	40
1408	2576.64	66.3333	63.6667		2576.64	40	40
1409	2578.47	66.3333	63.6667		2578.47	40	40
1410	2580.3	66.3333	63.6667		2580.3	40	40
1411	2582.13	66.3333	63.6667		2582.13	40	40
1412	2583.96	66.3333	63.6667		2583.96	40	40
1413	2585.79	66.3333	63.6667		2585.79	40	40
1414	2587.62	69.3333	63.6667		2587.62	36.6667	40
1415	2589.45	69.3333	63.6667		2589.45	36.6667	40
1416	2591.28	69.3333	60.3333		2591.28	36.6667	40
1417	2593.11	69.3333	60.3333		2593.11	40	40
1418	2594.94	69.3333	60.3333		2594.94	40	40
1419	2596.77	69.3333	60.3333		2596.77	40	40
1420	2598.6	69.3333	60.3333		2598.6	40	43.3333
1421	2600.43	69.3333	60.3333		2600.43	40	43.3333
1422	2602.26	66.3333	60.3333		2602.26	45.6667	43.3333
1423	2604.09	66.3333	60.3333		2604.09	45.6667	43.3333
1424	2605.92	66.3333	60.3333		2605.92	48.6667	43.3333
1425	2607.75	66.3333	60.3333		2607.75	48.6667	43.3333
1426	2609.58	66.3333	60.3333		2609.58	48.6667	43.3333
1427	2611.41	66.3333	57		2611.41	48.6667	43.3333
1428	2613.24	66.3333	57		2613.24	45.6667	43.3333
1429	2615.07	66.3333	53.3333		2615.07	45.6667	43.3333
1430	2616.9	66.3333	53.3333		2616.9	45.6667	43.3333
1431	2618.73	69.3333	53.3333		2618.73	42	43.3333
1432	2620.56	69.3333	53.3333		2620.56	42	43.3333
1433	2622.39	72.3333	53.3333		2622.39	38.6667	43.3333
1434	2624.22	72.3333	53.3333		2624.22	38.6667	43.3333
1435	2626.05	75.3333	53.3333		2626.05	35.6667	43.3333
1436	2627.88	75.3333	53.3333		2627.88	35.6667	43.3333
1437	2629.71	78.3333	53.3333		2629.71	35.6667	40
1438	2631.54	72.3333	53.3333		2631.54	36.6667	40
1439	2633.37	72.3333	53.3333		2633.37	40	40
1440	2635.2	72.3333	57		2635.2	40	40
1441	2637.03	75.3333	57		2637.03	43	36.3333
1442	2638.86	75.3333	60.3333		2638.86	43	36.3333
1443	2640.69	78.3333	60.3333		2640.69	40	36.3333
1444	2642.52	78.3333	60.3333		2642.52	40	40
1445	2644.35	78.3333	63.3333		2644.35	36.6667	40
1446	2646.18	75.3333	63.3333		2646.18	40	40
1447	2648.01	72.3333	63.3333		2648.01	40	40
1448	2649.84	69.3333	60.3333		2649.84	40	40
1449	2651.67	66.3333	60.3333		2651.67	40	40
1450	2653.5	66.3333	60.3333		2653.5	40	40
1451	2655.33	66.3333	60.3333		2655.33	40	40
1452	2657.16	66.3333	60.3333		2657.16	40	40
1453	2658.99	69.3333	60.3333		2658.99	40	40
1454	2660.82	56.6667	60.3333		2660.82	40	40
1455	2662.65	56.6667	60.3333		2662.65	40	40
1456	2664.48	59.6667	53.3333		2664.48	40	40
1457	2666.31	59.6667	53.3333		2666.31	40	40
1458	2668.14	59.6667	53.3333		2668.14	40	40
1459	2669.97	59.6667	53.3333		2669.97	40	40
1460	2671.8	59.6667	53.3333		2671.8	40	40
1461	2673.63	59.6667	53.3333		2673.63	40	40
1462	2675.46	63.3333	53.3333		2675.46	33.6667	40
1463	2677.29	63.3333	53.3333		2677.29	33.6667	40
1464	2679.12	63.3333	53.3333		2679.12	33.6667	40
1465	2680.95	63.3333	53.3333		2680.95	33.6667	40
1466	2682.78	63.3333	53.3333		2682.78	33.6667	40
1467	2684.61	63.3333	53.3333		2684.61	33.6667	40
1468	2686.44	63.3333	53.3333		2686.44	33.6667	43.3333
1469	2688.27	63.3333	53.3333		2688.27	33.6667	40
1470	2690.1	58.6667	53.3333		2690.1	36.6667	40
1471	2691.93	61.6667	53.3333		2691.93	36.6667	36.3333
1472	2693.76	61.6667	53.3333		2693.76	36.6667	36.3333
1473	2695.59	65.3333	53.3333		2695.59	36.6667	40
1474	2697.42	65.3333	53.3333		2697.42	36.6667	40
1475	2699.25	61.6667	53.3333		2699.25	36.6667	43.3333
1476	2701.08	61.6667	53.3333		2701.08	36.6667	43.3333
1477	2702.91	58.6667	53.3333		2702.91	36.6667	46.3333
1478	2704.74	58.6667	53.3333		2704.74	30.6667	46.3333
1479	2706.57	58.6667	53.3333		2706.57	30.6667	50.3333
1480	2708.4	58.6667	53.3333		2708.4	33.6667	50.3333
1481	2710.23	61.6667	53.3333		2710.23	33.6667	46.3333
1482	2712.06	61.6667	53.3333		2712.06	33.6667	46.3333
1483	2713.89	65.3333	53.3333		2713.89	33.6667	43.3333
1484	2715.72	65.3333	53.3333		2715.72	30.6667	40
1485	2717.55	65.3333	53.3333		2717.55	30.6667	43.3333
1486	2719.38	61.6667	53.3333		2719.38	40	43.3333
1487	2721.21	61.6667	53.3333		2721.21	40	46.3333
1488	2723.04	65.3333	57		2723.04	40	46.3333
1489	2724.87	68.3333	57		2724.87	40	43.3333
1490	2726.7	68.3333	57		2726.7	40	43.3333
1491	2728.53	71.3333	57		2728.53	40	40
1492	2730.36	74.3333	57		2730.36	40	40
1493	2732.19	74.3333	57		2732.19	40	40
1494	2734.02	80.6667	57		2734.02	40	40
1495	2735.85	77.6667	57		2735.85	40	40
1496	2737.68	74.3333	53.3333		2737.68	40	40
1497	2739.51	74.3333	53.3333		2739.51	40	40
1498	2741.34	71.3333	53.3333		2741.34	40	40
1499	2743.17	68.3333	53.3333		2743.17	40	40
1500	2745	65.3333	53.3333		2745	40	36.3333
1501	2746.83	65.3333	53.3333		2746.83	40	36.3333
1502	2748.66	65.3333	53.3333		2748.66	43	36.3333
1503	2750.49	65.3333	53.3333		2750.49	43	40
1504	2752.32	65.3333	53.3333		2752.32	43	40
1505	2754.15	65.3333	53.3333		2754.15	43	43.3333
1506	2755.98	65.3333	53.3333		2755.98	43	43.3333
1507	2757.81	65.3333	53.3333		2757.81	43	43.3333
1508	2759.64	65.3333	53.3333		2759.64	43	40
1509	2761.47	65.3333	53.3333		2761.47	43	40
1510	2763.3	65.3333	53.3333		2763.3	36.6667	36.3333
1511	2765.13	65.3333	53.3333		2765.13	36.6667	36.3333
1512	2766.96	65.3333	50.3333		2766.96	36.6667	36.3333
1513	2768.79	61.6667	50.3333		2768.79	36.6667	33.3333
1514	2770.62	61.6667	50.3333		2770.62	36.6667	33.3333
1515	2772.45	58.6667	50.3333		2772.45	36.6667	33.3333
1516	2774.28	58.6667	50.3333		2774.28	36.6667	40
1517	2776.11	58.6667	50.3333		2776.11	36.6667	43.3333
1518	2777.94	55.6667	50.3333		2777.94	33.6667	46.3333
1519	2779.77	55.6667	50.3333		2779.77	33.6667	46.3333
1520	2781.6	55.6667	57		2781.6	30.6667	46.3333
1521	2783.43	58.6667	57		2783.43	30.6667	46.3333
1522	2785.26	58.6667	57		2785.26	30.6667	43.3333
1523	2787.09	61.6667	57		2787.09	27.6667	40
1524	2788.92	61.6667	57		2788.92	27.6667	40
1525	2790.75	61.6667	57		2790.75	27.6667	40
1526	2792.58	58.6667	57		2792.58	36.6667	40
1527	2794.41	58.6667	57		2794.41	36.6667	40
1528	2796.24	58.6667	50.3333		2796.24	33.6667	40
1529	2798.07	58.6667	50.3333		2798.07	33.6667	40
1530	2799.9	58.6667	50.3333		2799.9	36.6667	40
1531	2801.73	58.6667	50.3333		2801.73	36.6667	40
1532	2803.56	58.6667	50.3333		2803.56	40	40
1533	2805.39	58.6667	50.3333		2805.39	43	40
1534	2807.22	52.6667	50.3333		2807.22	49.6667	40
1535	2809.05	52.6667	50.3333		2809.05	49.6667	40
1536	2810.88	52.6667	53.3333		2810.88	49.6667	40
1537	2812.71	52.6667	53.3333		2812.71	46.6667	40
1538	2814.54	52.6667	53.3333		2814.54	46.6667	40
1539	2816.37	52.6667	53.3333		2816.37	46.6667	40
1540	2818.2	52.6667	53.3333		2818.2	43	36.3333
1541	2820.03	52.6667	53.3333		2820.03	43	36.3333
1542	2821.86	58.6667	53.3333		2821.86	40	36.3333
1543	2823.69	58.6667	53.3333		2823.69	40	40
1544	2825.52	58.6667	53.3333		2825.52	40	40
1545	2827.35	58.6667	53.3333		2827.35	40	40
1546	2829.18	58.6667	53.3333		2829.18	43	43.3333
1547	2831.01	58.6667	50.3333		2831.01	43	43.3333
1548	2832.84	58.6667	50.3333		2832.84	46.6667	46.3333
1549	2834.67	58.6667	46.3333		2834.67	46.6667	46.3333
1550	2836.5	55.6667	46.3333		2836.5	46.6667	46.3333
1551	2838.33	55.6667	46.3333		2838.33	46.6667	46.3333
1552	2840.16	55.6667	46.3333		2840.16	46.6667	46.3333
1553	2841.99	55.6667	46.3333		2841.99	43	46.3333
1554	2843.82	55.6667	46.3333		2843.82	43	46.3333
1555	2845.65	55.6667	46.3333		2845.65	40	46.3333
1556	2847.48	55.6667	46.3333		2847.48	40	40
1557	2849.31	55.6667	46.3333		2849.31	40	40
1558	2851.14	55.6667	46.3333		2851.14	36.6667	40
1559	2852.97	55.6667	46.3333		2852.97	36.6667	40
1560	2854.8	55.6667	46.3333		2854.8	36.6667	40
1561	2856.63	55.6667	46.3333		2856.63	40	40
1562	2858.46	55.6667	46.3333		2858.46	40	40
1563	2860.29	55.6667	46.3333		2860.29	43	40
1564	2862.12	55.6667	46.3333		2862.12	43	36.3333
1565	2863.95	55.6667	46.3333		2863.95	43	36.3333
1566	2865.78	58.6667	46.3333		2865.78	36.6667	36.3333
1567	2867.61	58.6667	46.3333		2867.61	36.6667	36.3333
1568	2869.44	58.6667	46.3333		2869.44	36.6667	36.3333
1569	2871.27	58.6667	46.3333		2871.27	40	36.3333
1570	2873.1	58.6667	46.3333		2873.1	40	36.3333
1571	2874.93	58.6667	46.3333		2874.93	43	36.3333
1572	2876.76	58.6667	46.3333		2876.76	43	40
1573	2878.59	58.6667	46.3333		2878.59	43	40
1574	2880.42	58.6667	46.3333		2880.42	43	40
1575	2882.25	58.6667	46.3333		2882.25	40	40
1576	2884.08	58.6667	45.3333		2884.08	40	40
1577	2885.91	55.6667	45.3333		2885.91	36.6667	40
1578	2887.74	55.6667	45.3333		2887.74	36.6667	40
1579	2889.57	52.6667	45.3333		2889.57	40	40
1580	2891.4	52.6667	45.3333		2891.4	40	40
1581	2893.23	52.6667	45.3333		2893.23	43	43.3333
1582	2895.06	55.6667	45.3333		2895.06	40	43.3333
1583	2896.89	55.6667	45.3333		2896.89	40	46.3333
1584	2898.72	55.6667	45.3333		2898.72	40	46.3333
1585	2900.55	52.6667	45.3333		2900.55	40	43.3333
1586	2902.38	52.6667	45.3333		2902.38	40	43.3333
1587	2904.21	49.6667	45.3333		2904.21	40	40
1588	2906.04	49.6667	45.3333		2906.04	40	43.3333
1589	2907.87	49.6667	45.3333		2907.87	40	43.3333
1590	2909.7	52.6667	45.3333		2909.7	40	40
1591	2911.53	52.6667	45.3333		2911.53	40	40
1592	2913.36	52.6667	45.3333		2913.36	40	40
1593	2915.19	52.6667	45.3333		2915.19	40	36.3333
1594	2917.02	52.6667	45.3333		2917.02	40	36.3333
1595	2918.85	52.6667	45.3333		2918.85	40	36.3333
1596	2920.68	52.6667	45.3333		2920.68	40	36.3333
1597	2922.51	52.6667	45.3333		2922.51	40	36.3333
1598	2924.34	52.6667	45.3333		2924.34	36.6667	36.3333
1599	2926.17	52.6667	45.3333		2926.17	40	36.3333
1600	2928	52.6667	45.3333		2928	40	36.3333
1601	2929.83	55.6667	45.3333		2929.83	43	36.3333
1602	2931.66	55.6667	45.3333		2931.66	43	36.3333
1603	2933.49	58.6667	45.3333		2933.49	40	36.3333
1604	2935.32	58.6667	45.3333		2935.32	40	40
1605	2937.15	58.6667	45.3333		2937.15	36.6667	40
1606	2938.98	58.6667	45.3333		2938.98	40	40
1607	2940.81	58.6667	45.3333		2940.81	40	40
1608	2942.64	58.6667	45.3333		2942.64	40	40
1609	2944.47	55.6667	45.3333		2944.47	40	40
1610	2946.3	55.6667	45.3333		2946.3	40	40
1611	2948.13	52.6667	45.3333		2948.13	40	43.3333
1612	2949.96	52.6667	45.3333		2949.96	40	40
1613	2951.79	52.6667	45.3333		2951.79	40	40
1614	2953.62	52.6667	45.3333		2953.62	43	40
1615	2955.45	52.6667	45.3333		2955.45	43	40
1616	2957.28	52.6667	45.3333		2957.28	43	40
1617	2959.11	52.6667	45.3333		2959.11	43	40
1618	2960.94	52.6667	45.3333		2960.94	43	40
1619	2962.77	52.6667	45.3333		2962.77	43	40
1620	2964.6	52.6667	45.3333		2964.6	43	40
1621	2966.43	52.6667	45.3333		2966.43	43	40
1622	2968.26	55.6667	45.3333		2968.26	40	40
1623	2970.09	55.6667	45.3333		2970.09	40	40
1624	2971.92	55.6667	45.3333		2971.92	40	40
1625	2973.75	55.6667	45.3333		2973.75	36.6667	40
1626	2975.58	55.6667	45.3333		2975.58	36.6667	40
1627	2977.41	55.6667	45.3333		2977.41	33.6667	40
1628	2979.24	55.6667	45.3333		2979.24	33.6667	43.3333
1629	2981.07	55.6667	45.3333		2981.07	33.6667	43.3333
1630	2982.9	55.6667	45.3333		2982.9	36.6667	43.3333
1631	2984.73	55.6667	45.3333		2984.73	36.6667	43.3333
1632	2986.56	55.6667	45.3333		2986.56	36.6667	43.3333
1633	2988.39	55.6667	45.3333		2988.39	36.6667	43.3333
1634	2990.22	55.6667	45.3333		2990.22	36.6667	43.3333
1635	2992.05	55.6667	45.3333		2992.05	36.6667	43.3333
1636	2993.88	55.6667	45.3333		2993.88	36.6667	40
1637	2995.71	55.6667	45.3333		2995.71	36.6667	40
1638	2997.54	55.6667	45.3333		2997.54	36.6667	40
1639	2999.37	55.6667	45.3333		2999.37	36.6667	40
1640	3001.2	55.6667	45.3333		3001.2	36.6667	40
1641	3003.03	55.6667	45.3333		3003.03	36.6667	40
1642	3004.86	55.6667	45.3333		3004.86	36.6667	40
1643	3006.69	55.6667	45.3333		3006.69	36.6667	40
1644	3008.52	55.6667	45.3333		3008.52	36.6667	36.3333
1645	3010.35	55.6667	45.3333		3010.35	36.6667	36.3333
1646	3012.18	52.6667	45.3333		3012.18	36.6667	36.3333
1647	3014.01	52.6667	45.3333		3014.01	36.6667	36.3333
1648	3015.84	52.6667	45.3333		3015.84	36.6667	36.3333
1649	3017.67	52.6667	45.3333		3017.67	36.6667	36.3333
1650	3019.5	52.6667	45.3333		3019.5	36.6667	36.3333
1651	3021.33	52.6667	45.3333		3021.33	36.6667	36.3333
1652	3023.16	52.6667	45.3333		3023.16	36.6667	33.3333
1653	3024.99	52.6667	45.3333		3024.99	36.6667	33.3333
1654	3026.82	55.6667	45.3333		3026.82	36.6667	33.3333
1655	3028.65	55.6667	45.3333		3028.65	36.6667	36.3333
1656	3030.48	55.6667	45.3333		3030.48	36.6667	36.3333
1657	3032.31	55.6667	45.3333		3032.31	36.6667	40
1658	3034.14	55.6667	45.3333		3034.14	36.6667	40
1659	3035.97	55.6667	45.3333		3035.97	36.6667	40
1660	3037.8	55.6667	45.3333		3037.8	36.6667	36.3333
1661	3039.63	55.6667	45.3333		3039.63	36.6667	36.3333
1662	3041.46	55.6667	45.3333		3041.46	36.6667	40
1663	3043.29	55.6667	45.3333		3043.29	36.6667	40
1664	3045.12	55.6667	45.3333		3045.12	36.6667	40
1665	3046.95	55.6667	45.3333		3046.95	36.6667	43.3333
1666	3048.78	55.6667	45.3333		3048.78	36.6667	43.3333
1667	3050.61	55.6667	45.3333		3050.61	36.6667	43.3333
1668	3052.44	55.6667	45.3333		3052.44	36.6667	43.3333
1669	3054.27	55.6667	45.3333		3054.27	36.6667	43.3333
1670	3056.1	55.6667	45.3333		3056.1	36.6667	43.3333
1671	3057.93	55.6667	45.3333		3057.93	36.6667	40
1672	3059.76	55.6667	45.3333		3059.76	36.6667	40
1673	3061.59	55.6667	45.3333		3061.59	36.6667	36.3333
1674	3063.42	55.6667	45.3333		3063.42	36.6667	36.3333
1675	3065.25	55.6667	45.3333		3065.25	36.6667	36.3333
1676	3067.08	55.6667	45.3333		3067.08	36.6667	40
1677	3068.91	55.6667	45.3333		3068.91	36.6667	40
1678	3070.74	55.6667	45.3333		3070.74	36.6667	40
1679	3072.57	55.6667	45.3333		3072.57	36.6667	40
1680	3074.4	55.6667	45.3333		3074.4	36.6667	40
1681	3076.23	55.6667	45.3333		3076.23	36.6667	40
1682	3078.06	55.6667	45.3333		3078.06	36.6667	40
1683	3079.89	55.6667	45.3333		3079.89	36.6667	40
1684	3081.72	55.6667	45.3333		3081.72	36.6667	40
1685	3083.55	55.6667	45.3333		3083.55	36.6667	40
1686	3085.38	55.6667	45.3333		3085.38	43	40
1687	3087.21	55.6667	45.3333		3087.21	43	40
1688	3089.04	55.6667	45.3333		3089.04	43	40
1689	3090.87	55.6667	45.3333		3090.87	43	40
1690	3092.7	55.6667	45.3333		3092.7	43	40
1691	3094.53	55.6667	45.3333		3094.53	43	40
1692	3096.36	55.6667	45.3333		3096.36	43	43.3333
1693	3098.19	55.6667	45.3333		3098.19	43	43.3333
1694	3100.02	55.6667	45.3333		3100.02	43	43.3333
1695	3101.85	55.6667	45.3333		3101.85	40	40
1696	3103.68	55.6667	45.3333		3103.68	36.6667	40
1697	3105.51	55.6667	45.3333		3105.51	36.6667	36.3333
1698	3107.34	55.6667	45.3333		3107.34	33.6667	36.3333
1699	3109.17	55.6667	45.3333		3109.17	33.6667	36.3333
1700	3111	55.6667	45.3333		3111	36.6667	36.3333
1701	3112.83	55.6667	45.3333		3112.83	36.6667	36.3333
1702	3114.66	55.6667	45.3333		3114.66	30.6667	36.3333
1703	3116.49	55.6667	45.3333		3116.49	30.6667	36.3333
1704	3118.32	55.6667	45.3333		3118.32	30.6667	36.3333
1705	3120.15	55.6667	45.3333		3120.15	33.6667	36.3333
1706	3121.98	55.6667	45.3333		3121.98	33.6667	36.3333
1707	3123.81	55.6667	45.3333		3123.81	36.6667	36.3333
1708	3125.64	55.6667	45.3333		3125.64	36.6667	36.3333
1709	3127.47	55.6667	45.3333		3127.47	36.6667	36.3333
1710	3129.3	58.6667	45.3333		3129.3	33.6667	40
1711	3131.13	58.6667	45.3333		3131.13	33.6667	40
1712	3132.96	58.6667	45.3333		3132.96	33.6667	40
1713	3134.79	58.6667	45.3333		3134.79	33.6667	43.3333
1714	3136.62	58.6667	45.3333		3136.62	33.6667	43.3333
1715	3138.45	58.6667	45.3333		3138.45	33.6667	43.3333
1716	3140.28	58.6667	45.3333		3140.28	33.6667	43.3333
1717	3142.11	58.6667	45.3333		3142.11	33.6667	40
1718	3143.94	58.6667	45.3333		3143.94	33.6667	40
1719	3145.77	58.6667	45.3333		3145.77	33.6667	36.3333
1720	3147.6	58.6667	45.3333		3147.6	33.6667	36.3333
1721	3149.43	58.6667	45.3333		3149.43	33.6667	40
1722	3151.26	58.6667	45.3333		3151.26	33.6667	40
1723	3153.09	58.6667	45.3333		3153.09	33.6667	43.3333
1724	3154.92	58.6667	45.3333		3154.92	33.6667	43.3333
1725	3156.75	58.6667	45.3333		3156.75	33.6667	43.3333
1726	3158.58	58.6667	45.3333		3158.58	30.6667	43.3333
1727	3160.41	58.6667	45.3333		3160.41	30.6667	40
1728	3162.24	58.6667	45.3333		3162.24	30.6667	40
1729	3164.07	58.6667	45.3333		3164.07	30.6667	36.3333
1730	3165.9	58.6667	45.3333		3165.9	30.6667	36.3333
1731	3167.73	58.6667	45.3333		3167.73	30.6667	36.3333
1732	3169.56	58.6667	45.3333		3169.56	30.6667	36.3333
1733	3171.39	58.6667	45.3333		3171.39	30.6667	36.3333
1734	3173.22	58.6667	45.3333		3173.22	36.6667	36.3333
1735	3175.05	58.6667	45.3333		3175.05	36.6667	36.3333
1736	3176.88	58.6667	45.3333		3176.88	36.6667	36.3333
1737	3178.71	58.6667	45.3333		3178.71	36.6667	36.3333
1738	3180.54	58.6667	45.3333		3180.54	36.6667	36.3333
1739	3182.37	58.6667	45.3333		3182.37	36.6667	36.3333
1740	3184.2	58.6667	45.3333		3184.2	36.6667	36.3333
1741	3186.03	58.6667	45.3333		3186.03	36.6667	36.3333
1742	3187.86	58.6667	45.3333		3187.86	33.6667	36.3333
1743	3189.69	58.6667	45.3333		3189.69	33.6667	40
1744	3191.52	58.6667	45.3333		3191.52	33.6667	40
1745	3193.35	58.6667	45.3333		3193.35	33.6667	43.3333
1746	3195.18	58.6667	45.3333		3195.18	33.6667	43.3333
1747	3197.01	58.6667	45.3333		3197.01	33.6667	43.3333
1748	3198.84	58.6667	45.3333		3198.84	33.6667	46.3333
1749	3200.67	58.6667	45.3333		3200.67	33.6667	46.3333
1750	3202.5	55.6667	45.3333		3202.5	36.6667	46.3333
1751	3204.33	52.6667	45.3333		3204.33	33.6667	46.3333
1752	3206.16	49.6667	45.3333		3206.16	33.6667	46.3333
1753	3207.99	46.6667	45.3333		3207.99	33.6667	46.3333
1754	3209.82	46.6667	45.3333		3209.82	33.6667	46.3333
1755	3211.65	46.6667	45.3333		3211.65	36.6667	46.3333
1756	3213.48	46.6667	45.3333		3213.48	40	46.3333
1757	3215.31	49.6667	45.3333		3215.31	42	46.3333
1758	3217.14	52.6667	45.3333		3217.14	46.3333	46.3333
1759	3218.97	52.6667	45.3333		3218.97	49.3333	46.3333
1760	3220.8	52.6667	45.3333		3220.8	52.6667	46.3333
1761	3222.63	52.6667	45.3333		3222.63	58.6667	46.3333
1762	3224.46	52.6667	45.3333		3224.46	61.6667	46.3333
1763	3226.29	52.6667	45.3333		3226.29	61.6667	46.3333
1764	3228.12	52.6667	45.3333		3228.12	61.6667	36.3333
1765	3229.95	52.6667	45.3333		3229.95	61.6667	36.3333
1766	3231.78	52.6667	45.3333		3231.78	61.6667	36.3333
1767	3233.61	52.6667	45.3333		3233.61	65.3333	36.3333
1768	3235.44	52.6667	45.3333		3235.44	65.3333	36.3333
1769	3237.27	55.6667	45.3333		3237.27	68.3333	36.3333
1770	3239.1	55.6667	45.3333		3239.1	71.3333	36.3333
1771	3240.93	58.6667	45.3333		3240.93	74.3333	36.3333
1772	3242.76	58.6667	45.3333		3242.76	74.3333	33.3333
1773	3244.59	58.6667	45.3333		3244.59	74.3333	33.3333
1774	3246.42	58.6667	45.3333		3246.42	82.6667	33.3333
1775	3248.25	58.6667	45.3333		3248.25	82.3333	33.3333
1776	3250.08	58.6667	45.3333		3250.08	82.3333	33.3333
1777	3251.91	58.6667	45.3333		3251.91	82.3333	33.3333
1778	3253.74	58.6667	45.3333		3253.74	86.3333	33.3333
1779	3255.57	58.6667	45.3333		3255.57	86.3333	33.3333
1780	3257.4	58.6667	45.3333		3257.4	86.3333	36.3333
1781	3259.23	58.6667	45.3333		3259.23	89.3333	36.3333
1782	3261.06	58.6667	45.3333		3261.06	82.3333	36.3333
1783	3262.89	58.6667	45.3333		3262.89	82.3333	36.3333
1784	3264.72	58.6667	45.3333		3264.72	82.3333	36.3333
1785	3266.55	58.6667	45.3333		3266.55	82.3333	36.3333
1786	3268.38	58.6667	45.3333		3268.38	82.3333	36.3333
1787	3270.21	58.6667	45.3333		3270.21	82.3333	36.3333
1788	3272.04	58.6667	45.3333		3272.04	82.3333	36.3333
1789	3273.87	58.6667	45.3333		3273.87	82.3333	36.3333
1790	3275.7	58.6667	45.3333		3275.7	87	36.3333
1791	3277.53	58.6667	45.3333		3277.53	83.6667	36.3333
1792	3279.36	58.6667	45.3333		3279.36	82.6667	36.3333
1793	3281.19	58.6667	45.3333		3281.19	82.6667	36.3333
1794	3283.02	58.6667	45.3333		3283.02	82.6667	36.3333
1795	3284.85	58.6667	45.3333		3284.85	86	36.3333
1796	3286.68	58.6667	45.3333		3286.68	89.3333	36.3333
1797	3288.51	58.6667	45.3333		3288.51	92.3333	36.3333
1798	3290.34	61.6667	45.3333		3290.34	95.3333	36.3333
1799	3292.17	61.6667	45.3333		3292.17	95.3333	40
1800	3294	61.6667	43.3333		3294	93.3333	40
1801	3295.83	61.6667	43.3333		3295.83	96.3333	43.3333
1802	3297.66	61.6667	43.3333		3297.66	96.3333	43.3333
1803	3299.49	61.6667	43.3333		3299.49	96.3333	43.3333
1804	3301.32	61.6667	43.3333		3301.32	99.3333	43.3333
1805	3303.15	61.6667	43.3333		3303.15	99.3333	43.3333
1806	3304.98	61.6667	43.3333		3304.98	102.667	43.3333
1807	3306.81	61.6667	43.3333		3306.81	102.667	43.3333
1808	3308.64	61.6667	46.3333		3308.64	102.667	43.3333
1809	3310.47	61.6667	46.3333		3310.47	102.667	43.3333
1810	3312.3	61.6667	46.3333		3312.3	102.667	43.3333
1811	3314.13	61.6667	46.3333		3314.13	102.667	43.3333
1812	3315.96	61.6667	46.3333		3315.96	102.333	40
1813	3317.79	61.6667	46.3333		3317.79	102.333	40
1814	3319.62	61.6667	46.3333		3319.62	93.3333	40
1815	3321.45	61.6667	46.3333		3321.45	93.3333	40
1816	3323.28	61.6667	45.3333		3323.28	96.3333	40
1817	3325.11	61.6667	45.3333		3325.11	96.3333	40
1818	3326.94	61.6667	45.3333		3326.94	93.3333	40
1819	3328.77	61.6667	45.3333		3328.77	90.3333	40
1820	3330.6	61.6667	45.3333		3330.6	89.3333	46.3333
1821	3332.43	61.6667	45.3333		3332.43	86.3333	46.3333
1822	3334.26	61.6667	45.3333		3334.26	78.3333	46.3333
1823	3336.09	61.6667	45.3333		3336.09	78.3333	46.3333
1824	3337.92	61.6667	45.3333		3337.92	75.3333	46.3333
1825	3339.75	61.6667	45.3333		3339.75	72.3333	46.3333
1826	3341.58	61.6667	45.3333		3341.58	66.3333	46.3333
1827	3343.41	61.6667	45.3333		3343.41	63.3333	46.3333
1828	3345.24	61.6667	45.3333		3345.24	59.6667	43.3333
1829	3347.07	61.6667	45.3333		3347.07	59.6667	43.3333
1830	3348.9	58.6667	45.3333		3348.9	61.6667	43.3333
1831	3350.73	58.6667	45.3333		3350.73	61.6667	43.3333
1832	3352.56	58.6667	46.3333		3352.56	58.6667	43.3333
1833	3354.39	58.6667	46.3333		3354.39	58.6667	43.3333
1834	3356.22	58.6667	46.3333		3356.22	55.6667	43.3333
1835	3358.05	58.6667	46.3333		3358.05	52.6667	43.3333
1836	3359.88	58.6667	46.3333		3359.88	49.6667	43.3333
1837	3361.71	58.6667	46.3333		3361.71	49.6667	43.3333
1838	3363.54	58.6667	46.3333		3363.54	42	43.3333
1839	3365.37	58.6667	46.3333		3365.37	42	40
1840	3367.2	58.6667	40		3367.2	42	40
1841	3369.03	58.6667	40		3369.03	42	36.3333
1842	3370.86	58.6667	40		3370.86	38.6667	36.3333
1843	3372.69	58.6667	40		3372.69	38.6667	36.3333
1844	3374.52	58.6667	40		3374.52	38.6667	36.3333
1845	3376.35	58.6667	40		3376.35	35.6667	36.3333
1846	3378.18	58.6667	40		3378.18	38.6667	36.3333
1847	3380.01	58.6667	40		3380.01	42	40
1848	3381.84	58.6667	40		3381.84	42	40
1849	3383.67	58.6667	40		3383.67	42	43.3333
1850	3385.5	58.6667	40		3385.5	42	43.3333
1851	3387.33	58.6667	40		3387.33	42	43.3333
1852	3389.16	58.6667	40		3389.16	42	46.3333
1853	3390.99	58.6667	40		3390.99	42	46.3333
1854	3392.82	52.6667	40		3392.82	36.6667	46.3333
1855	3394.65	52.6667	40		3394.65	33.6667	46.3333
1856	3396.48	52.6667	46.3333		3396.48	33.6667	46.3333
1857	3398.31	52.6667	46.3333		3398.31	33.6667	46.3333
1858	3400.14	52.6667	46.3333		3400.14	33.6667	46.3333
1859	3401.97	52.6667	43.3333		3401.97	36.6667	46.3333
1860	3403.8	52.6667	43.3333		3403.8	40	46.3333
1861	3405.63	52.6667	40		3405.63	43	46.3333
1862	3407.46	52.6667	40		3407.46	43	46.3333
1863	3409.29	52.6667	40		3409.29	46.6667	46.3333
1864	3411.12	52.6667	40		3411.12	46.6667	46.3333
1865	3412.95	52.6667	40		3412.95	46.6667	46.3333
1866	3414.78	52.6667	40		3414.78	46.6667	46.3333
1867	3416.61	52.6667	40		3416.61	43	46.3333
1868	3418.44	52.6667	40		3418.44	40	46.3333
1869	3420.27	52.6667	40		3420.27	36.6667	46.3333
1870	3422.1	52.6667	40		3422.1	36.6667	46.3333
1871	3423.93	52.6667	40		3423.93	33.6667	46.3333
1872	3425.76	52.6667	40		3425.76	33.6667	46.3333
1873	3427.59	52.6667	40		3427.59	30.6667	46.3333
1874	3429.42	52.6667	40		3429.42	30.6667	46.3333
1875	3431.25	52.6667	40		3431.25	33.6667	46.3333
1876	3433.08	52.6667	40		3433.08	33.6667	46.3333
1877	3434.91	52.6667	40		3434.91	36.6667	46.3333
1878	3436.74	52.6667	40		3436.74	36.6667	46.3333
1879	3438.57	52.6667	40		3438.57	36.6667	46.3333
1880	3440.4	52.6667	43.3333		3440.4	36.6667	46.3333
1881	3442.23	52.6667	43.3333		3442.23	36.6667	46.3333
1882	3444.06	52.6667	43.3333		3444.06	36.6667	46.3333
1883	3445.89	52.6667	43.3333		3445.89	36.6667	46.3333
1884	3447.72	52.6667	43.3333		3447.72	36.6667	46.3333
1885	3449.55	52.6667	43.3333		3449.55	36.6667	46.3333
1886	3451.38	55.6667	43.3333		3451.38	36.6667	46.3333
1887	3453.21	55.6667	43.3333		3453.21	36.6667	46.3333
1888	3455.04	55.6667	46.3333		3455.04	36.6667	46.3333
1889	3456.87	55.6667	46.3333		3456.87	36.6667	46.3333
1890	3458.7	55.6667	46.3333		3458.7	36.6667	46.3333
1891	3460.53	55.6667	46.3333		3460.53	36.6667	46.3333
1892	3462.36	55.6667	46.3333		3462.36	36.6667	45.3333
1893	3464.19	55.6667	46.3333		3464.19	36.6667	45.3333
1894	3466.02	52.6667	46.3333		3466.02	40	45.3333
1895	3467.85	52.6667	46.3333		3467.85	40	45.3333
1896	3469.68	52.6667	45.3333		3469.68	40	45.3333
1897	3471.51	52.6667	45.3333		3471.51	40	45.3333
1898	3473.34	52.6667	45.3333		3473.34	40	45.3333
1899	3475.17	52.6667	45.3333		3475.17	40	45.3333
1900	3477	52.6667	45.3333		3477	40	45.3333
1901	3478.83	52.6667	45.3333		3478.83	40	45.3333
1902	3480.66	55.6667	45.3333		3480.66	43	45.3333
1903	3482.49	55.6667	45.3333		3482.49	43	45.3333
1904	3484.32	55.6667	45.3333		3484.32	43	45.3333
1905	3486.15	52.6667	45.3333		3486.15	43	45.3333
1906	3487.98	52.6667	45.3333		3487.98	43	45.3333
1907	3489.81	49.6667	45.3333		3489.81	43	45.3333
1908	3491.64	49.6667	45.3333		3491.64	43	46.3333
1909	3493.47	49.6667	45.3333		3493.47	43	46.3333
1910	3495.3	52.6667	45.3333		3495.3	40	46.3333
1911	3497.13	52.6667	45.3333		3497.13	40	46.3333
1912	3498.96	52.6667	45.3333		3498.96	40	46.3333
1913	3500.79	52.6667	45.3333		3500.79	40	46.3333
1914	3502.62	52.6667	45.3333		3502.62	40	46.3333
1915	3504.45	52.6667	45.3333		3504.45	40	46.3333
1916	3506.28	52.6667	45.3333		3506.28	40	43.3333
1917	3508.11	52.6667	45.3333		3508.11	40	43.3333
1918	3509.94	52.6667	45.3333		3509.94	40	43.3333
1919	3511.77	52.6667	45.3333		3511.77	40	43.3333
1920	3513.6	52.6667	45.3333		3513.6	40	43.3333
1921	3515.43	52.6667	45.3333		3515.43	40	43.3333
1922	3517.26	52.6667	45.3333		3517.26	40	43.3333
1923	3519.09	52.6667	45.3333		3519.09	40	43.3333
1924	3520.92	52.6667	45.3333		3520.92	40	40
1925	3522.75	52.6667	45.3333		3522.75	40	40
1926	3524.58	49.6667	45.3333		3524.58	36.6667	40
1927	3526.41	49.6667	45.3333		3526.41	36.6667	40
1928	3528.24	49.6667	45.3333		3528.24	36.6667	40
1929	3530.07	49.6667	45.3333		3530.07	36.6667	40
1930	3531.9	49.6667	45.3333		3531.9	36.6667	40
1931	3533.73	49.6667	45.3333		3533.73	36.6667	40
1932	3535.56	49.6667	45.3333		3535.56	36.6667	43.3333
1933	3537.39	49.6667	45.3333		3537.39	36.6667	43.3333
1934	3539.22	49.6667	45.3333		3539.22	36.6667	43.3333
1935	3541.05	49.6667	45.3333		3541.05	36.6667	43.3333
1936	3542.88	49.6667	45.3333		3542.88	36.6667	43.3333
1937	3544.71	49.6667	45.3333		3544.71	36.6667	43.3333
1938	3546.54	49.6667	45.3333		3546.54	36.6667	43.3333
1939	3548.37	49.6667	45.3333		3548.37	36.6667	43.3333
1940	3550.2	49.6667	45.3333		3550.2	36.6667	46.3333
1941	3552.03	49.6667	45.3333		3552.03	36.6667	46.3333
1942	3553.86	49.6667	45.3333		3553.86	36.6667	46.3333
1943	3555.69	49.6667	45.3333		3555.69	36.6667	46.3333
1944	3557.52	49.6667	46.3333		3557.52	36.6667	46.3333
1945	3559.35	49.6667	46.3333		3559.35	36.6667	46.3333
1946	3561.18	49.6667	46.3333		3561.18	36.6667	46.3333
1947	3563.01	49.6667	46.3333		3563.01	36.6667	46.3333
1948	3564.84	49.6667	46.3333		3564.84	36.6667	46.3333
1949	3566.67	49.6667	46.3333		3566.67	36.6667	46.3333
1950	3568.5	46.6667	46.3333		3568.5	36.6667	46.3333
1951	3570.33	46.6667	46.3333		3570.33	36.6667	46.3333
1952	3572.16	46.6667	46.3333		3572.16	36.6667	46.3333
1953	3573.99	46.6667	46.3333		3573.99	36.6667	46.3333
1954	3575.82	46.6667	46.3333		3575.82	36.6667	46.3333
1955	3577.65	46.6667	46.3333		3577.65	36.6667	46.3333
1956	3579.48	46.6667	46.3333		3579.48	36.6667	40
1957	3581.31	46.6667	46.3333		3581.31	36.6667	43.3333
1958	3583.14	46.6667	46.3333		3583.14	33.6667	43.3333
1959	3584.97	46.6667	46.3333		3584.97	33.6667	46.3333
1960	3586.8	46.6667	49		3586.8	33.6667	46.3333
1961	3588.63	46.6667	49		3588.63	33.6667	43.3333
1962	3590.46	46.6667	49		3590.46	33.6667	43.3333
1963	3592.29	46.6667	49		3592.29	33.6667	40
1964	3594.12	46.6667	49		3594.12	33.6667	40
1965	3595.95	46.6667	49		3595.95	33.6667	40
1966	3597.78	46.6667	49		3597.78	40	40
1967	3599.61	46.6667	49		3599.61	40	40
1968	3601.44	46.6667	45.3333		3601.44	40	40
1969	3603.27	46.6667	45.3333		3603.27	40	40
1970	3605.1	46.6667	45.3333		3605.1	40	40
1971	3606.93	46.6667	45.3333		3606.93	40	40
1972	3608.76	46.6667	45.3333		3608.76	40	36.3333
1973	3610.59	46.6667	45.3333		3610.59	40	36.3333
1974	3612.42	49.6667	45.3333		3612.42	36.6667	36.3333
1975	3614.25	49.6667	45.3333		3614.25	36.6667	36.3333
1976	3616.08	49.6667	46.3333		3616.08	36.6667	36.3333
1977	3617.91	46.6667	46.3333		3617.91	36.6667	36.3333
1978	3619.74	46.6667	46.3333		3619.74	36.6667	36.3333
1979	3621.57	43	46.3333		3621.57	36.6667	36.3333
1980	3623.4	43	46.3333		3623.4	36.6667	43.3333
1981	3625.23	43	46.3333		3625.23	36.6667	43.3333
1982	3627.06	46.6667	46.3333		3627.06	40	43.3333
1983	3628.89	46.6667	46.3333		3628.89	40	43.3333
1984	3630.72	46.6667	46.3333		3630.72	40	43.3333
1985	3632.55	46.6667	46.3333		3632.55	40	43.3333
1986	3634.38	46.6667	46.3333		3634.38	40	43.3333
1987	3636.21	46.6667	46.3333		3636.21	40	43.3333
1988	3638.04	46.6667	46.3333		3638.04	40	45.3333
1989	3639.87	46.6667	46.3333		3639.87	40	45.3333
1990	3641.7	46.6667	46.3333		3641.7	43	45.3333
1991	3643.53	46.6667	46.3333		3643.53	43	45.3333
1992	3645.36	46.6667	45.3333		3645.36	43	45.3333
1993	3647.19	46.6667	45.3333		3647.19	40	45.3333
1994	3649.02	46.6667	45.3333		3649.02	40	45.3333
1995	3650.85	46.6667	45.3333		3650.85	40	45.3333
1996	3652.68	46.6667	45.3333		3652.68	36.6667	45.3333
1997	3654.51	46.6667	45.3333		3654.51	36.6667	45.3333
[truncated: 4,122 more rows]

## Sheet: IHC vs iDISCO - ToPro3
Mean fluoorescence intensity (Raw)
Th: 1000	iDISCO			IF					iDISCO		IF
Imaging depth (um)	9	12	15	D1	E1	F1		Imaging depth (um)	Average	SD	Average	SD
1000	2484.45	2324.82	1814.52	2197.8	1655.7	1910.51		1000	2207.93	349.927	1921.34	271.212
2000	2758.36	2621.24	2509.43	2411.13	2400.82	2778.18		2000	2629.68	124.679	2530.04	214.954
3000	2704.16	2490.47	2763.73	2786.96	2578.94	3160.3		3000	2652.79	143.691	2842.07	294.572
4000	2714.61	2411.91	2769.05	2600.72	2521.92	2698.54		4000	2631.86	192.414	2607.06	88.4805
5000	2103.71	2030.05	2144.56	2071.45	1966.99	2669.17		5000	2092.77	58.0331	2235.87	378.866

## Sheet: IHC vs iDISCO - SMACy3
Mean fluoorescence intensity (Raw)
Th: 1000	iDISCO			IF					iDISCO		IF
Imaging depth (um)	9	12	15	D1	E1	F1		Imaging depth (um)	Average	SD	Average	SD
1000	2151.95	2267.97	2635.11	1882.67	2080.35	2679.19		1000	2351.68	252.222	2214.07	414.755
2000	1638.91	1820.58	1495.42	1596.1	1676.33	1972.63		2000	1651.64	162.953	1748.35	198.329
3000	1716.19	1713.04	1401.79	1342.28	1654.55	1455.46		3000	1610.34	180.616	1484.1	158.092
4000	1851.03	2033.94	1506.23	1439.21	1701.2	1578.97		4000	1797.07	267.962	1573.13	131.093
5000	1689.35	1724.44	2238.58	1531.29	1565.24	1710.82		5000	1884.12	307.469	1602.45	95.374
